# Supplementary material
Source: PubMed Central journal article supplement (PMC4872317)
Supplement: supp_JCO.2015.64.3817_Protocol_2015.643817.pdf [file supp_JCO.2015.64.3817_Protocol_2015.643817.pdf]

## Efficacy and biomarker study of bevacizumab for hearing loss due to neurofibromatosis type 2 associated vestibular schwannomas

Jaishri O. Blakeley<sup>1,\*,+</sup>, Xiaobu Ye<sup>2\*</sup>, Dan G. Duda<sup>3</sup>, Chris Halpin<sup>4</sup>, Amanda L. Bergner<sup>5</sup>, Alona Muzikansky<sup>6</sup>, Vanessa L. Merker<sup>7</sup>, Elizabeth R. Gerstner<sup>7</sup>, Laura Fayad<sup>8</sup>, Shivani Ahlawat<sup>8</sup>, Michael Jacobs<sup>8</sup>, Rakesh K. Jain<sup>3</sup>, Christopher Zalewski<sup>9</sup>, Eva Dombi<sup>10</sup>, Brigitte Widemann<sup>10</sup>, Scott R. Plotkin<sup>7</sup>

(\*These authors contributed equally)

- 1 Johns Hopkins University, Departments of Neurology, Neurosurgery and Oncology, Baltimore, MD, USA
- 2 Johns Hopkins University, Department of Neurosurgery, Baltimore, MD, USA
- 3 Steele Laboratories, Radiation Oncology, Massachusetts General Hospital, Boston, MA, USA
- 4 Department of Audiology, Massachusetts Eye and Ear Infirmary, Boston, MA, USA
- 5 Johns Hopkins University, Departments of Neurology and Genetics, Baltimore, MD, USA
- 6 Biostatistics Center, Massachusetts General Hospital, Boston, MA, USA
- 7 Department of Neurology and Cancer Center, Massachusetts General Hospital, Boston, MA, USA
- 8 Johns Hopkins University, Department of Radiology, Baltimore, MD, USA
- 9 National Institutes of Health, National Institute on Deafness and Other Communication Disorders (NIDCD), Otolaryngology Branch, Audiology Unit, Bethesda, MD, USA
- 10 National Institutes of Health, National Cancer Institute, CCR, Pediatric Oncology Branch, Bethesda, MD, USA

Research support for this manuscript was provided by the Cancer Therapy Evaluation Program, the Galloway Family Foundation, by the NCI, CCR intramural research program, and by the Intramural Research Program of the National Institute on Deafness and Other Communication Disorders, National Institutes of Health (Bethesda, Maryland, USA).

### +Corresponding author:

Jaishri O. Blakeley, MD  
Johns Hopkins Comprehensive Neurofibromatosis Center  
Johns Hopkins University, Baltimore, MD  
Email: jblakel3@jhmi.edu  
Fax: 410-614-9335

Running head: Bevacizumab for NF2-related vestibular schwannoma

Presented in part at the Children's Tumor Foundation Neurofibromatosis Conference, Monterey, CA, June 8-11, 2013; and the European Association of Neurosurgical Societies, Tel Aviv, Israel, November 11-14, 2013

## ABSTRACT

**PURPOSE:** Neurofibromatosis type 2 (NF2) is a tumor predisposition syndrome characterized by bilateral vestibular schwannomas (VS) resulting in deafness and brainstem compression. This study evaluated efficacy and biomarkers of bevacizumab activity for NF2-associated progressive and symptomatic VS.

**METHODS:** Bevacizumab (7.5mg/kg) was given every 3 weeks for 46 weeks, followed by 24-weeks of surveillance off drug. The primary endpoint was hearing response defined by word recognition score (WRS). Secondary endpoints included toxicity, tolerability, imaging response using volumetric MRI analysis, durability of response, and imaging and blood biomarkers.

**RESULTS:** Fourteen patients (estimated to yield >90% power to detect an alternative response rate of 50% at alpha level of 0.05) with NF2, median age 30 (range, 14-79 years) with progressive hearing loss in the target ear (median baseline WRS 60%, range 13-82%) were enrolled. The primary endpoint, confirmed hearing response (improvement maintained  $\geq 3$  months), occurred in 5/14 patients (36%; 95%CI, 13-65%,  $p < 0.0001$ ). 8/14 patients (57%) had transient hearing improvement above the 95%CI for WRS. No patients experienced hearing decline. Radiographic response was seen in 6/14 (43%) target VS. Three grade 3 adverse events, hypertension (N=2) and immune-mediated thrombocytopenic purpura (N=1), were possibly related to bevacizumab. Bevacizumab treatment was associated with decreased free VEGF (not bound to bevacizumab) and increased PIGF in plasma. Hearing responses were inversely associated with baseline plasma HGF ( $p = 0.019$ ). Imaging responses were associated

with high baseline tumor vessel permeability and elevated blood levels of VEGF-D and SDF1 $\alpha$  ( $p=0.037$  and  $p=0.025$ , respectively).

CONCLUSION: Bevacizumab treatment resulted in durable hearing response in 36% of patients with NF2 and confirmed progressive VS-associated hearing loss. Imaging and plasma biomarkers showed promising associations with response that should be validated in larger studies.

Funding: Galloway Family Foundation, the Cancer Therapy Evaluation Program, NCI, NIDCD, CCR intramural research program.

## Introduction

Vestibular schwannomas (VS) are histologically benign tumors of the eighth nerve resulting in hearing loss, imbalance and brainstem compression. VS are common with roughly 3,000 new cases per year in the United States.<sup>1</sup> Surgery and radiation therapy (RT) achieve sustained control in >95% of sporadic, unilateral VS.<sup>2-4</sup> Germline inactivation of the gene *NF2* results in the rare tumor syndrome Neurofibromatosis type 2 (NF2) characterized by bilateral VS and multiple additional schwannomas, meningiomas and ependymomas.<sup>5-7</sup> NF2 associated VS cause higher morbidity as they are bilateral,<sup>8-10</sup> multi-lobular<sup>11, 12</sup> and have poor outcomes with standard therapies.<sup>13-16</sup> As a result, most people with NF2 develop significant hearing loss in young adulthood.<sup>5,8</sup>

Nearly 100% of VS express vascular endothelial growth factor (VEGF-A or VEGF).<sup>17-19</sup> Pharmacologic inhibition of VEGF in VS murine xenograft models decreases permeability and increases pericyte coverage consistent with vascular normalization.<sup>20-22</sup> Bevacizumab is a humanized IgG1 monoclonal blocking antibody specific for VEGF. Anecdotal experience with 31 individuals with NF2-associated VS treated with bevacizumab showed hearing improvement in 57% of people, making bevacizumab the first therapy to demonstrate functional and imaging responses in people with NF2.<sup>17, 23</sup> However, it also requires long-term administration and is associated with chronic toxicity.<sup>24</sup>

This study was conducted to: (1) prospectively confirm the hearing response (HR) rate in a well-defined patient population with NF2-associated VS hearing loss, (2)

define the duration of benefit on and off drug, and (3) identify biomarkers that may predict which individuals are most likely to benefit from bevacizumab.

## Patients and Methods

This multi-institution, open label phase II trial enrolled subjects with NF2 and documented VS-associated hearing loss. The primary endpoint was the proportion of subjects with confirmed HR in the target ear. Secondary endpoints included the durability of HR, HR in non-target evaluable ears, change in VS volumetric MRI measures compared to baseline, safety, and the relationship between imaging and blood biomarkers and HR or radiographic response (RR). The trial was approved by site Institutional Review Boards and the NCI Cancer Therapy Evaluation Program (CTEP). Bevacizumab was supplied by Genentech through a Clinical Research and Development Agreement (CRADA) with CTEP. All subjects or their legal guardians provided informed consent.

Subjects  $\geq 12$  years old meeting National Institute of Health (NIH) or Manchester clinical criteria for NF2<sup>25-27</sup>, with documented VS-associated hearing loss on serial audiograms over 24 months pre-enrollment, and a target ear baseline word recognition score (WRS) of  $< 90\%$  were eligible. Exclusion criteria included: prior anti-angiogenesis therapy, medical conditions incompatible with bevacizumab, and tumors not amenable to volumetric MRI analysis (Supplementary Data, Protocol).

Bevacizumab was given intravenously at 7.5 mg/kg every three weeks for 16 doses. Subjects were then assessed for 24 weeks off drug (Figure 1).

The target tumor was the VS with documented active, progressive hearing loss. Audiology examinations were performed at baseline, weeks 13, 25, 49, 60, and off study. WRS was assessed with a 100-word list of monosyllable words delivered via standardized methodology at a sound level determined to yield the optimal score for each participant.<sup>28, 29</sup> The 95% ( $p=0.05$ ) critical difference table defined statistically significant increased WRS (HR) or decreased WRS (hearing decline) (Supplementary Table 1).<sup>14,28,30</sup> Confirmed HR was defined as an increase in WRS exceeding the 95% critical difference referenced to baseline and maintained across 2 evaluations over 3 months.

MRI brain was performed at baseline, weeks 13, 25, 49, and off study. Anatomical and functional imaging protocols were standardized across all sites on a Siemens 3T Verio with published protocols.<sup>30, 31</sup> Volumetric analysis was performed centrally using the anatomical sequences by independent radiologists blinded to treatment.<sup>31</sup> Enhancing tumor volume was outlined on post-contrast images. Median values of each parameter within enhancing tumor were computed. Double baseline MRI was performed to establish the test-retest variability in volumetric analysis of VS. Changes in VS volumes compared with baseline were determined for target and, when feasible, contralateral VS. RR definitions are: partial response (PR)  $\geq 20\%$  decrease in tumor volume, minor response (MR) 5% to 19% decrease in volume, progressive disease (PD)  $\geq 20\%$  increase in tumor volume and stable disease (SD) for all others. RR was confirmed at 3 months. Functional MRI sequences, dynamic contrast enhanced (DCE)-MRI to calculate  $K^{trans}$  (a measure of vascular permeability) and apparent

diffusion coefficient (ADC), were processed using custom-made software in Matlab (The MathWorks, Natick, Massachusetts), using published approaches.<sup>32, 33</sup>

Adverse events (AEs) were graded and attributed to bevacizumab according the Common Terminology Criteria for Adverse Events (CTCAE) v4.0 prior to infusion (every 3 weeks); physical examination every 6 weeks. Blood pressure was assessed weekly for the first six weeks and pre-infusion thereafter. For subjects <18 years old, bone toxicity was monitored with laboratory and imaging studies. (Supplemental Data, Protocol).

Circulating biomarkers were evaluated in peripheral blood pre-treatment, on treatment (weeks 25 and 49) and off treatment (week 72). Plasma samples were obtained from fresh blood, aliquoted, frozen, and analyzed for circulating VEGF, placental growth factor (PlGF), VEGF-C, VEGF-D, soluble VEGF receptor 1 (sVEGFR1 or sFLT1), basic fibroblast growth factor (bFGF), sTie-2, interleukin (IL)-1 $\beta$ , IL-6, IL-8, and tumor necrosis factor- $\alpha$  (TNF- $\alpha$ ), using multiplex enzyme-linked immunosorbent assay (ELISA) plates from Meso-Scale Discovery (Gaithersburg, MD). Hepatocyte growth factor (HGF), s-cMET, sVEGFR2, stromal cell-derived factor 1 $\alpha$  (SDF1 $\alpha$ ), angiopoietins 1 and 2 (Ang1, Ang2) and carbonic anhydrase IX (CAIX) were measured using single analyte ELISA kits from R&D Systems (Minneapolis, MN). All samples were run in duplicate.

### Statistical analysis

The primary endpoint was HR defined as increased WRS above the 95% critical threshold and maintained across at least two time points compared to baseline WRS.



Using a one-stage design based on a null hypothesis of response rate at 5%, a total of 14 subjects with confirmed progressive hearing loss were estimated to yield above 90% power to detect an alternative response rate of 50% at alpha level of 0.05. The trial requires 4 or more responders of 14 to reject the null hypothesis. Baseline patient and disease characteristics are presented with standard descriptive summaries. Proportion of HR was estimated using binomial distribution along with 95% confidence interval. The binomial exact test was used for testing proportions. Pearson correlation coefficient was used to estimate a correlation between continuous variables. All p-values are reported as 2-sided. All analyses were conducted using SAS software (version 9.2, SAS Institute).

Percent changes in the blood and imaging biomarkers from pre-, during and post-treatment were summarized using descriptive statistics. Blood biomarker analysis is reported per-patient and imaging biomarker analysis per-tumor. The differences before and during treatment in blood and imaging biomarkers were assessed with paired statistics. Signed Rank test was used to assess the significance of the change over time and Wilcoxon Sign-Rank test was used to test the difference between HR group and RR groups. Tumor reduction was calculated based on the percent change in volume from baseline to week 25 for all tumors. Correlation between RR for target VS and median ADC and  $K^{trans}$  at baseline was determined using the Spearman correlation test.

## Results

Fourteen subjects (10 female), median age of 30 years (range, 14-79) were enrolled between November 2010 and August 2011 (Table 1). Eight participants had prior surgery, 6 on the non-target ear, two bilaterally. Three participants had prior RT, one to target and two to non-target VS, 15-120 months prior to BEV (Supplementary Table 2). All subjects were evaluable for response and toxicity. Median baseline target ear WRS was 60% (range, 13-82%). Only 4/14 (28%) target ears had “serviceable” hearing (class A or B) per the American Academy of Otolaryngology-Head and Neck Society Hearing Committee guidelines (Supplementary Figure 1).<sup>34</sup> Nine of fourteen subjects (64%) were anacusic in the non-target ear.

Five of 14 subjects (36%; 95% CI: 13, 65%,  $p < 0.0001$ ) achieved the primary endpoint of confirmed HR in the target ear. This was achieved by week 13 in 4/5 subjects and maintained continuously throughout treatment. No subject had hearing decline while on bevacizumab, despite progressive hearing loss being required for enrolment. Of the five subjects evaluable for HR in the non-target ear, 4 had confirmed HR (80%, 95%CI: 28, 99%; Table 2). In total, 9/19 evaluable ears (47%, 95%CI: 24, 71%) achieved confirmed HR (Table 2). Pre- and post-treatment hearing scattergrams are presented in Supplementary Figure 1.

Bevacizumab was stopped after 12 months to assess durability of response. Three of five subjects (60%) with confirmed HR in the target ear maintained this 6 months off drug (Figure 2a). Similarly, 2/4 subjects with confirmed HR in the non-target ear maintained HR 6 months off drug. In total, 5/9 (target and non-target) ears with confirmed HR maintained this for 6 months off drug.

The median baseline target VS volume was 3.0cc (range 0.7-23cc). The mean difference in volume across the two baseline assessments was 0.02 cc ( $p=0.83$ ), confirming the reproducibility of volumetric measurements. A total of 28 VS (14 target and 14 contralateral) were evaluable for RR. PR at any time point was achieved in 6/14 (43%) of target and 6/14 (43%) non-target ears (Table 2). Confirmed PR (imaging response maintained across two evaluation time points) was seen in 2/14 target VS (14%, 95%CI: 2, 43%). Maximal reduction was 39.7% at week 49. Confirmed MR occurred in 7/14 target VS (50%, 95%CI: 23, 77%). One person with confirmed MR had RT to the target ear 10 years earlier and theoretically, late recovery from RT could influence RR (Supplementary Table 2). No VS achieving MR or PR at any time point developed PD on treatment, but two VS with best response of SD developed PD at week 49 (Figure 2b). In the non-target VS, 3/14 tumors (21%, 95%CI: 5-51%) had confirmed PR and 6/14 (43%, 95%CI: 18, 71%) had confirmed MR. Of note, 2 non-target VS achieving PR had prior RT 15 and 48 months prior to enrolment that could potentially influence RR. In total, 5/28 (18%, 95%CI: 6, 37%) VS achieved confirmed PR and 13/28 VS (46%, 95%CI: 28, 66%) had confirmed MR. Of the 18/28 VS with confirmed PR or MR, 9 (50%) maintained durability of RR 6 months off of drug (Figure 2b).

There was no significant correlation between HR and RR when analyzed by subject or by target VS ( $r=0.34$ , 95%CI: -0.14, 0.82,  $p=0.23$ ). There was also no significant correlation between WRS and tumor volume over time ( $R=0.287$ , 95%CI: -0.29, 0.71;  $p=0.32$ ). Finally, there was no significant relationship between HR and baseline factors including age, gender or baseline WRS (Table 1).

There were 124 AEs possibly related to bevacizumab. Of these, 121 were classified as grade 1-2 (Table 3). The three grade 3 AEs were 2 episodes of hypertension that responded to monotherapy and one episode of idiopathic thrombocytopenia purpura (ITP) that required treatment termination at week 16, but resolved 6 months off drug. A second subject discontinued treatment after 13/16 planned doses due to required surgery for another tumor. No bone toxicity occurred in the 2 subjects <18 years old. Three of seven females with normal menstruation at baseline developed grade 1-2 irregular menstruation that resolved off treatment. There were 11 additional episodes of grade 1-2 bleeding (Table 3).

We explored potential associations between baseline functional imaging markers, ADC and  $K^{\text{trans}}$ , as well as changes in ADC and  $K^{\text{trans}}$  during treatment, with HR and RR. ADC and  $K^{\text{trans}}$  values were evaluable for 12 target VS and 9 contralateral VS. Baseline ADC values were not associated with HR or RR in target ears. However, dynamic changes in ADC from baseline to week 25 were associated with HR in target ears ( $p=0.019$ ) with a median decrease in ADC of 9% in subjects with HR.  $K^{\text{trans}}$  was not significantly associated with HR, but baseline  $K^{\text{trans}}$  values were associated with RR at week 25 across all evaluable tumors ( $p=0.037$ ,  $n = 21$ ) and target VS achieving RR had higher baseline  $K^{\text{trans}}$  than non-responders (0.30 vs. 0.07, respectively,  $p=0.051$ ).

Bevacizumab was associated with decreased plasma levels of free VEGF across all time points, in all subjects. At weeks 25 and 49, this was accompanied by increased levels of total VEGF, which significantly dropped post treatment (Figure 3 and Supplementary Table 3). Bevacizumab was also associated with increased plasma levels of PIGF (at all-time points), and VEGF-D and SDF1 $\alpha$  at week 49 (Figure 3 and

Supplementary Table 3). Finally, bevacizumab was associated with a transient decrease in Ang2 levels at week 25 (Figure 3 and Supplementary Table 3). HR was associated with lower baseline HGF ( $p=0.019$ ), decreased plasma CAIX at weeks 25 and 49 ( $p=0.010$  and  $p=0.035$ , respectively), and an increase in plasma sVEGFR2 at week 25 ( $p=0.004$ , Supplementary Figure 2, Supplementary Table 4). RR was associated with higher baseline levels of VEGF-D and SDF1 $\alpha$  ( $p=0.037$  and  $p=0.025$ , respectively); decreased s-cKIT at week 25 ( $p=0.023$ ); and a decrease in sTie2 at week 49 ( $p=0.034$ ) (Supplementary Table 5).

## Discussion

The most common and universally life-altering consequence of NF2 is hearing loss, with the majority of affected individuals progressing to deafness in their third decade.<sup>5, 6, 8, 10</sup> Bevacizumab given on a compassionate-use basis to people with NF2 resulted in HR in 57% of evaluable patients.<sup>17, 23</sup> This outcome was unprecedented, heralding the possibility of effective therapy for these tumors. However, it left much uncertainty about the optimal patient population, dosing strategy and long-term durability. The results of this prospective efficacy study confirm the proportion of NF2 patients with symptomatic VS who achieve durable HR with bevacizumab (36%, 95% CI 13-65%,  $p<0.0001$ ), the durability of response on and off drug and present several candidate biomarkers that may ultimately allow rational selection of patients for therapy.

HR was selected as the primary endpoint as it is clinically meaningful and provides evidence of drug activity given that durable hearing improvement with NF2-associated VS is improbable either spontaneously or with RT or resection.<sup>8, 15, 16</sup> HR

assessed by WRS is quantifiable, reliable and feasible for measuring hearing function over time.<sup>28, 29</sup> We required that statistically significant HR be maintained for at least 3 months to both overcome concerns about spurious HR and with the awareness that NF2-associated VS are chronic tumors for which short-term efficacy would have little value. Natural history data shows that only 16% of people with NF2 have spontaneous HR if baseline WRS is <90%.<sup>8</sup> The finding of a 36% (95% CI 13-65%) confirmed HR in people with NF2, documented progressive hearing loss and a median baseline WRS of 60% represents noteworthy therapeutic benefit. Moreover, the unconfirmed HR rate of 57% in this prospective study is identical to large retrospective series<sup>17, 23</sup> and far superior to spontaneous HR in natural history studies.<sup>8</sup>

Although bevacizumab was well tolerated in this study, there were 3 serious AEs and 3/7 females who had normal menstruation at baseline developed menstrual irregularities. However, all women recovered baseline menstrual function off bevacizumab. This experience echoes recent reports of ovarian failure in women with breast cancer treated with bevacizumab. Given the age of people with NF2 considered for treatment, this AE should be expressly discussed with women considering bevacizumab therapy and monitored during treatment.

An important finding is that 55% of subjects who achieved HR in any ear maintained this response for up to 6 months *off* of drug. Similar durability was seen with RR. These results suggest that after HR is achieved, multi-week dosing intervals or drug holidays capitalizing on the long half-life of bevacizumab may be feasible. Interestingly, analysis of antiangiogenic therapies across a variety of cancers also suggest alternative dosing strategies may be more efficacious based on markers of

vessel normalization and oxygenation.<sup>35</sup> Analysis of blood markers in this study is also consistent with this hypothesis. Specifically, we saw unexpectedly high baseline VEGF levels, comparable to those in brain cancer.<sup>32, 33</sup> Secondly, there was a sustained decrease in the circulating levels of free VEGF (with a corresponding increase in total VEGF) and a transient decrease in Ang2 during bevacizumab therapy; a pattern reminiscent of biologic response to anti-VEGF therapy in cancer,<sup>35</sup> but not previously recognized in non-malignant tumor syndromes like NF2. Thirdly, bevacizumab treatment was associated with increased plasma levels of PlGF, VEGF-D and SDF1 $\alpha$  over time. These have been proposed as markers of resistance to anti-VEGF therapy in brain cancer,<sup>20, 35</sup> and may hold similar value as potential biomarkers for antiangiogenic therapy for benign nerve sheath tumors. Together these data indicate that circulating markers of vessel normalization and oxygenation may support alternative dosing strategies in both cancers and benign tumor syndromes.

Finally, the frequently observed absence of a significant correlation between hearing and tumor size in NF2-associated VS was borne out in this study. However, there were interesting associations between HR and dynamic changes in ADC from baseline to week 25 as well as lower absolute levels of HGF at baseline in patients achieving HR. These findings suggest that HR may be related to reduced tumor-associated edema and improved oxygenation rather than direct impact on tumor volume.<sup>22</sup> RR was associated with baseline  $K^{trans}$  and the degree of reduction in plasma free VEGF, VEGF-D and sTie-2 suggesting a pharmacodynamic relationship between targeting circulating VEGF and reducing hyperpermeable blood vessels.<sup>20, 36</sup> Lastly, the preliminary findings of Ang2 and sTie-2 changing in response to bevacizumab in people

with NF2 is notable since (a) similar patterns are observed with antiangiogenesis therapy in brain cancer, (b) Ang-2/Tie-2 is an important factor in proangiogenic pathways in general and (c) both proteins have been implicated in schwannomas.<sup>20, 32,</sup>

37

In conclusion, this prospective study confirms the efficacy and safety of bevacizumab in the subset of people with NF2 and progressive, symptomatic VS. The data, although from a small, single arm study, expand the understanding of required dosing intervals to maintain HR, potentially allowing lower doses over time, and identified several potential blood and imaging biomarkers that, if validated, will allow targeting therapy to the people with the highest likelihood of benefit. The ongoing subsequent study of bevacizumab for children and young adults with hearing loss due to NF2-associated VS (NCT01767792) will further investigate the findings from this study.



## References

1. Stangerup SE, Tos M, Thomsen J, et al: True incidence of vestibular schwannoma? *Neurosurgery* 67:1335-40; discussion 1340, 2010
2. Carlson ML, Link MJ, Wanna GB, et al: Management of sporadic vestibular schwannoma. *Otolaryngol Clin North Am* 48:407-422, 2015
3. Flickinger JC, Kondziolka D, Niranjan A, et al: Results of acoustic neuroma radiosurgery: An analysis of 5 years' experience using current methods. *J Neurosurg* 119 Suppl:1-6, 2013
4. Lunsford LD, Niranjan A, Flickinger JC, et al: Radiosurgery of vestibular schwannomas: Summary of experience in 829 cases. *J Neurosurg* 119 Suppl:195-199, 2013
5. Asthagiri AR, Parry DM, Butman JA, et al: Neurofibromatosis type 2. *Lancet* 373:1974-1986, 2009
6. Evans DG: Neurofibromatosis type 2 (NF2): A clinical and molecular review. *Orphanet J Rare Dis* 4:16, 2009
7. Ferner RE: Neurofibromatosis 1 and neurofibromatosis 2: A twenty first century perspective. *Lancet Neurol* 6:340-351, 2007
8. Plotkin SR, Merker VL, Muzikansky A, et al: Natural history of vestibular schwannoma growth and hearing decline in newly diagnosed neurofibromatosis type 2 patients. *Otol Neurotol* 35:e50-6, 2014
9. Blakeley JO, Evans DG, Adler J, et al: Consensus recommendations for current treatments and accelerating clinical trials for patients with neurofibromatosis type 2. *Am J Med Genet A* 158A:24-41, 2012

10. Fisher LM, Doherty JK, Lev MH, et al: Concordance of bilateral vestibular schwannoma growth and hearing changes in neurofibromatosis 2: Neurofibromatosis 2 natural history consortium. *Otol Neurotol* 30:835-841, 2009
11. Dewan R, Pemov A, Kim HJ, et al: Evidence of polyclonality in neurofibromatosis type 2-associated multilobulated vestibular schwannomas. *Neuro Oncol* 17:566-573, 2015
12. Stivaros SM, Stemmer-Rachamimov AO, Alston R, et al: Multiple synchronous sites of origin of vestibular schwannomas in neurofibromatosis type 2. *J Med Genet* 52:557-562, 2015
13. Sun S, Liu A: Long-term follow-up studies of gamma knife surgery for patients with neurofibromatosis type 2. *J Neurosurg* 121 Suppl:143-149, 2014
14. Plotkin SR, Ardern-Holmes SL, Barker FG, 2nd, et al: Hearing and facial function outcomes for neurofibromatosis 2 clinical trials. *Neurology* 81:S25-32, 2013
15. Rowe JG, Radatz MW, Walton L, et al: Clinical experience with gamma knife stereotactic radiosurgery in the management of vestibular schwannomas secondary to type 2 neurofibromatosis. *J Neurol Neurosurg Psychiatry* 74:1288-1293, 2003
16. Samii M, Matthies C, Tatagiba M: Management of vestibular schwannomas (acoustic neuromas): Auditory and facial nerve function after resection of 120 vestibular schwannomas in patients with neurofibromatosis 2. *Neurosurgery* 40:696-705; discussion 705-6, 1997
17. Plotkin SR, Stemmer-Rachamimov AO, Barker FG, 2nd, et al: Hearing improvement after bevacizumab in patients with neurofibromatosis type 2. *N Engl J Med* 361:358-367, 2009

18. Dalgorf DM, Rowsell C, Bilbao JM, et al: Immunohistochemical investigation of hormone receptors and vascular endothelial growth factor concentration in vestibular schwannoma. *Skull Base* 18:377-384, 2008
19. Koutsimpelas D, Stripf T, Heinrich UR, et al: Expression of vascular endothelial growth factor and basic fibroblast growth factor in sporadic vestibular schwannomas correlates to growth characteristics. *Otol Neurotol* 28:1094-1099, 2007
20. Jain RK: Antiangiogenesis strategies revisited: From starving tumors to alleviating hypoxia. *Cancer Cell* 26:605-622, 2014
21. Wong HK, Lahdenranta J, Kamoun WS, et al: Anti-vascular endothelial growth factor therapies as a novel therapeutic approach to treating neurofibromatosis-related tumors. *Cancer Res* 70:3483-3493, 2010
22. Jain RK, di Tomaso E, Duda DG, et al: Angiogenesis in brain tumours. *Nat Rev Neurosci* 8:610-622, 2007
23. Plotkin SR, Merker VL, Halpin C, et al: Bevacizumab for progressive vestibular schwannoma in neurofibromatosis type 2: A retrospective review of 31 patients. *Otol Neurotol* 33:1046-1052, 2012
24. Slusarz KM, Merker VL, Muzikansky A, et al: Long-term toxicity of bevacizumab therapy in neurofibromatosis 2 patients. *Cancer Chemother Pharmacol* 73:1197-1204, 2014
25. Consensus Development Panel. National Institutes of Health Consensus Development Conference Statement on Acoustic Neuroma, December 11–13, 1991. *Arch Neurol* 1994;51:201–207.

26. Evans D, Huson S, Donnai D, et al. A clinical study of type 2 neurofibromatosis. *Q J Med* 1992;84:603– 618.
27. Baser ME, Friedman JM, Wallace AJ, et al: Evaluation of clinical diagnostic criteria for neurofibromatosis 2 *Neurology* 59:1759-1765, 2002
28. Halpin C, Rauch SD: Using audiometric thresholds and word recognition in a treatment study. *Otol Neurotol* 27:110-116, 2006
29. Thornton AR, Raffin MJ: Speech-discrimination scores modeled as a binomial variable. *J Speech Hear Res* 21:507-518, 1978
30. Plotkin SR, Halpin C, Blakeley JO, et al: Suggested response criteria for phase II antitumor drug studies for neurofibromatosis type 2 related vestibular schwannoma. *J Neurooncol* 93:61-77, 2009
31. Harris GJ, Plotkin SR, Maccollin M, et al: Three-dimensional volumetrics for tracking vestibular schwannoma growth in neurofibromatosis type II. *Neurosurgery* 62:1314-9; discussion 1319-20, 2008
32. Batchelor TT, Gerstner ER, Emblem KE, et al: Improved tumor oxygenation and survival in glioblastoma patients who show increased blood perfusion after cediranib and chemoradiation. *Proc Natl Acad Sci U S A* 110:19059-19064, 2013
33. Batchelor TT, Duda DG, di Tomaso E, et al: Phase II study of cediranib, an oral pan-vascular endothelial growth factor receptor tyrosine kinase inhibitor, in patients with recurrent glioblastoma. *J Clin Oncol* 28:2817-2823, 2010
34. Gurgel RK, Jackler RK, Dobie RA, et al: A new standardized format for reporting hearing outcome in clinical trials. *Otolaryngol Head Neck Surg* 147:803-807, 2012

35. Jain RK, Duda DG, Willett CG, et al: Biomarkers of response and resistance to antiangiogenic therapy. *Nat Rev Clin Oncol* 6:327-338, 2009
36. Li KL, Djoukhadar I, Zhu X, et al: Vascular biomarkers derived from dynamic contrast-enhanced MRI predict response of vestibular schwannoma to antiangiogenic therapy in type 2 neurofibromatosis. *Neuro Oncol*, 2015
37. Boin A, Couvelard A, Couderc C, et al: Proteomic screening identifies a YAP-driven signaling network linked to tumor cell proliferation in human schwannomas. *Neuro Oncol* 16:1196-1209, 2014

## Figure Legends:

**Figure 1.** Trial Schema.

**Figure 2.** (A) Change in word recognition score during treatment (through week 49) and off treatment (weeks 60 and 72) for target ears. Color-coded by best confirmed response (HR—green, SD—black). (B) Change in tumor volume during treatment (through week 49) and off treatment (weeks 60 and 72) for target ears, Color-coded by best confirmed response (PR—blue, MR—green, SD—black, PD—red)

**Figure 3.** Line graphs showing changes over time in plasma total VEGF (free + bound), free VEGF, PIGF and SDF1 $\alpha$  for all participants (n=14). Anti-VEGF therapy with bevacizumab decreased the plasma levels of free VEGF, and increased the levels of antibody-bound VEGF, PIGF and SDF1 $\alpha$  in people with NF2.

## **Supplementary Figures:**

**Supplementary Figure 1.** (A) Scattergram of baseline hearing function for all target ears, as recommended by the Hearing Committee of the American Academy of Otolaryngology-Head and Neck Society (AAO-HNS). Color code: green—class A, yellow—class B, red—class C, blue—class D. (B) Scattergram of best change in hearing for all target ears after treatment with bevacizumab. Class A and B hearing are considered serviceable and class C and D are considered unserviceable.<sup>34</sup>

**Supplementary Figure 2.** Line graphs showing changes over time in relative free VEGF, total VEGF (free + bound), sVEGFR2, and CAIX in subjects with confirmed HR and confirmed RR versus non-responders. Panels A-D depict subjects with confirmed HR (n=5) vs. hearing non-responders (n=9). Panels E-H depict confirmed radiographic responders (n=9) vs. radiographic non-responders (n=5). Data are presented as median values with interquartile ranges; \* indicates a significant difference between relative biomarker concentrations in responders and non-responders ( $p < 0.05$ ).

**Table 1: Baseline patient demographics and clinical characteristics.**

|                                                     | <b>Total<br/>N=14</b> | <b>Confirmed<br/>Hearing<br/>Response<br/>N=5</b> | <b>No<br/>Confirmed<br/>Hearing<br/>Response<br/>N=9</b> | <b>P-value</b> |
|-----------------------------------------------------|-----------------------|---------------------------------------------------|----------------------------------------------------------|----------------|
| <b>Age – year</b>                                   |                       |                                                   |                                                          | 0.2            |
| Median                                              | 30.5                  | 26.0                                              | 32.0                                                     |                |
| Range                                               | 14-79                 | 14-33                                             | 14-79                                                    |                |
| <b>Sex – no .(%)</b>                                |                       |                                                   |                                                          | 0.6            |
| Male                                                | 4 (29)                | 1 (20)                                            | 3 (33)                                                   |                |
| Female                                              | 10 (71)               | 4 (80)                                            | 6 (67)                                                   |                |
| <b>Race - no .(%)</b>                               |                       |                                                   |                                                          |                |
| White                                               | 12 (87)               | 3 (60)                                            | 9 (100)                                                  | 0.1            |
| <b>Karnofsky<br/>Performance Status no.<br/>(%)</b> |                       |                                                   |                                                          | 0.7            |
| 90                                                  | 7 (50)                | 3 (60)                                            | 4 (44)                                                   |                |
| 70- 80                                              | 7 (50)                | 2 (40)                                            | 5 (56)                                                   |                |
| <b>% Word Recognition<br/>Score Target Ear</b>      |                       |                                                   |                                                          | 0.7            |
| Median                                              | 60.5                  | 72.0                                              | 56.0                                                     |                |
| Range                                               | 13-82                 | 20-78                                             | 13--82                                                   |                |
| <b>Tumor Volume (cc)<br/>Target Ear</b>             |                       |                                                   |                                                          | 0.9            |
| Median                                              | 3.0                   | 2.3                                               | 3.4                                                      |                |
| Range                                               | 0.7-23                | 1.2-22                                            | 0.7-23                                                   |                |



**Table 2. Hearing and imaging response data during 12 months of bevacizumab treatment**

|                                             | Overall response |     | Confirmed response* |     |
|---------------------------------------------|------------------|-----|---------------------|-----|
|                                             | No.              | %   | No.                 | %   |
| <b>Hearing Response</b>                     |                  |     |                     |     |
| Target ear                                  | 8/14             | 57% | 5/14                | 36% |
| Contralateral ear                           | 4/5              | 80% | 4/5                 | 80% |
| All ears                                    | 12/19            | 63% | 9/19                | 47% |
|                                             |                  |     |                     |     |
| <b>Imaging response</b>                     |                  |     |                     |     |
| <b>Target vestibular schwannoma</b>         |                  |     |                     |     |
| Partial response ( $\geq 20\%$ decrease)    | 6/14             | 43% | 2/14                | 14% |
| Minor response (5-19% decrease)             | 4/14             | 29% | 7/14                | 50% |
| Stable disease                              | 4/14             | 29% | 5/14                | 36% |
| Progressive disease ( $\geq 20\%$ increase) | 2/14             | 14% | 0/14                | 0%  |
|                                             |                  |     |                     |     |
| <b>Contralateral vestibular schwannoma</b>  |                  |     |                     |     |
| Partial response ( $\geq 20\%$ decrease)    | 6/14             | 43% | 3/14                | 21% |
| Minor response (5-19% decrease)             | 6/14             | 43% | 3/14                | 21% |
| Stable disease                              | 2/14             | 14% | 6/14                | 43% |
| Progressive disease ( $\geq 20\%$ increase) | 0/14             | 0%  | 2/14                | 14% |
|                                             |                  |     |                     |     |

\*Confirmed response was defined as maintained across 2 evaluations at least 3 months apart.

**Table 3. Total number of adverse events possibly, probably, or definitively related to bevacizumab in 14 individuals with NF2 and progressive vestibular schwannomas.**

| <b>Adverse Event: No. (%)</b>                     | <b>Grade 1</b> | <b>Grade 2</b> | <b>Grade 3</b> |
|---------------------------------------------------|----------------|----------------|----------------|
| Abdominal pain                                    | 2 (14)         |                |                |
| Alanine aminotransferase increased                | 5 (36)         | 3 (21)         |                |
| Allergic rhinitis                                 | 1 (7)          |                |                |
| Anemia                                            | 1 (7)          |                |                |
| Anorexia                                          | 1 (7)          | 1 (7)          |                |
| Aspartate aminotransferase increased              | 8 (57)         |                |                |
| Bruising                                          | 2 (14)         |                |                |
| CPK increased                                     | 1 (7)          |                |                |
| Diarrhea                                          | 2 (14)         | 1 (7)          |                |
| Dizziness                                         |                | 1 (7)          |                |
| Dry skin                                          | 2 (14)         |                |                |
| Dyspepsia                                         | 2 (14)         |                |                |
| Dyspnea                                           |                | 2 (14)         |                |
| Electrocardiogram QT corrected interval prolonged | 1 (7)          |                |                |
| Epistaxis                                         | 8 (57)         | 2 (14)         |                |
| Fatigue                                           | 9 (64)         | 4 (29)         |                |
| Headache                                          | 2 (14)         |                |                |
| Hemoglobinuria                                    | 1 (7)          |                |                |
| Hemolysis                                         | 1 (7)          |                |                |
| Hemorrhoidal hemorrhage                           | 2 (14)         |                |                |
| Hoarseness                                        | 1 (7)          |                |                |
| Hyperglycemia                                     | 4 (29)         |                |                |
| Hypermagnesemia                                   | 2 (14)         |                |                |
| Hypertension                                      |                |                | 2 (14)         |
| Hypomagnesemia                                    | 1 (7)          |                |                |
| Increased Blood Bicarbonate                       | 1 (7)          |                |                |
| Irregular menstruation*                           | 5 (71)         | 1 (14)         |                |
| Menorrhagia*                                      | 2 (29)         | 1 (14)         |                |
| Mucositis oral                                    | 1 (7)          |                |                |

|                                                 |        |        |       |
|-------------------------------------------------|--------|--------|-------|
| Nausea                                          | 5 (36) | 2 (14) |       |
| Oral hemorrhage                                 | 2 (14) |        |       |
| Oral pain                                       | 1 (7)  |        |       |
| Palpitations                                    | 2 (14) |        |       |
| Peripheral sensory neuropathy                   | 1 (7)  |        |       |
| Platelet count decreased                        | 2 (14) |        |       |
| Proteinuria                                     | 7 (50) | 3 (21) |       |
| Rectal hemorrhage                               |        | 1 (7)  |       |
| Respiratory, thoracic and mediastinal disorders | 1 (7)  |        |       |
| Sore throat                                     | 4 (29) |        |       |
| Thrombocytopenia Purpura                        |        |        | 1 (7) |
| Vertigo                                         | 1 (7)  |        |       |
| Voice alteration                                | 1 (7)  |        |       |
| Vomiting                                        | 1 (7)  |        |       |
| Weight gain                                     | 1 (7)  |        |       |
| Weight loss                                     | 1 (7)  |        |       |
| Wound complication                              | 1 (7)  |        |       |

The Adverse Events with asterisks are those events that could only have occurred among 7 female subjects. The percent represents number of events out of 7 female subjects with baseline normal menstruation.

## **Acknowledgements**

Research support for this manuscript was provided by the Cancer Therapy Evaluation Program, the Galloway Family Foundation, the NCI, CCR intramural research program, and the Intramural Research Program of the National Institute on Deafness and Other Communication Disorders (Bethesda, Maryland, USA). We thank Dr. Helen Chen for her support and oversight of this study via the CTEP collaboration; Shannon Langmead, Andrea Baldwin, and Krista Follmer for their excellent care of patients enrolled on this study; Robert Evers, Hugh Wall, Trinity Urban and Dominique Jennings for their assistance with the imaging assessments and Rhonda Jackson for her administrative support with the manuscript.

**Bevacizumab 7.5mg/kg IV every 9 weeks**

14 subjects with  
M2, progressive  
hearing loss, > 50%  
word recognition in  
the affected ear

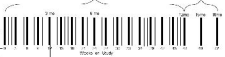

Baseline exam, MRI,  
audiogram and  
laboratory studies

Lab, MRI,  
audiogram and  
laboratory studies  
(week 0) - hearing  
assessment visit

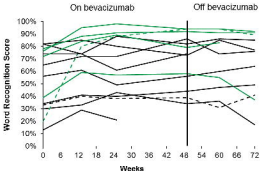

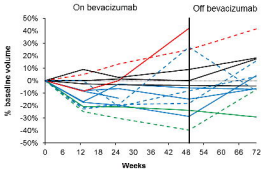

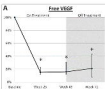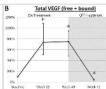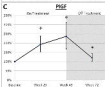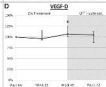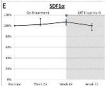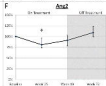



1 NCI Protocol #: 8248

2

3 Local Protocol #: NA\_00034732

4

5

6 TITLE: Phase 2 Study of bevacizumab in children and adults with Neurofibromatosis type  
7 2 and symptomatic vestibular schwannoma

8

9

10 Coordinating Center: Johns Hopkins University  
11 Trial Sponsor JHU, Cancer Therapy Evaluation Program  
12 NCI-supplied Agent Bevacizumab  
13 NSC# 704865  
14 IND# 7921

15

16 \*Principal Investigator: Jaishri Blakeley, M.D.  
17 Johns Hopkins Medical Institute  
18 Cancer Research Building II  
19 1550 Orleans Street, Room IM16  
20 Baltimore, MD 21231  
21 Telephone: 410-502-3378  
22 Fax: 410-614-9335  
23 E-mail address: jblakel3@jhmi.edu

24

25

26 Co-Investigator s: Scott R. Plotkin, MD, PhD  
27 Yawkey 9E, Massachusetts General Hospital  
28 55 Fruit Street  
29 Boston, MA 02114  
30 Telephone: 617-726-3650  
31 Fax: 617-643-2591  
32 E-mail address: splotkin@partners.org

33

34 Brigitte Widemann, M.D.  
35 Pediatric Oncology Branch, NCI  
36 10 Center Drive  
37 Building 10, CRC, Room 1-5750  
38 Bethesda, MD 20892-1101  
39 Telephone: 301-496-7387  
40 Fax: 301-480-8871  
41 E-mail address: widemanb@mail.nih.gov

42

43

44

1  
2  
3  
4  
5  
6  
7  
8  
9  
10  
11  
12  
13  
14  
15  
16  
17  
18  
19  
20  
21  
22  
23  
24  
25  
26  
27  
28  
29

Statistician:  
Xiaobu Ye, MD PhD  
Johns Hopkins Medical Institute  
550 North Broadway, Suite 1131  
Baltimore, MD 21205  
Telephone: 410-614-6261  
Fax: 410-955-0859  
E-mail address: xye3@jhmi.edu

Study Coordinator:  
Amanda Bergner, MS CGC  
Johns Hopkins Medical Institute  
600 North Wolfe Street, Phipps 117  
Baltimore, MD 21287  
Telephone: 410-502-6732  
Fax: 410-614-0845  
E-mail address: abergne1@jhmi.edu

Responsible Research Nurse:  
Shannon Langmead, CRNP  
Johns Hopkins Medical Institute  
Cancer Research Building II  
1550 Orleans Street, Room IM16  
Baltimore, MD 21231  
Telephone: 410-955-8837  
Fax: 410-614-9335  
E-mail address: slangme2@jhmi.edu

Responsible Data Manager:  
Name: TBD

NCI Supplied Agent: Bevacizumab (rhuMAb VEGF), #704865

Protocol Type / Version # / Version Date: Revised, version #11, 2/20/12

1  
2  
3  
4  
5  
6  
7  
8  
9  
10  
11

## SCHEMA

Figure 1. Study schema indicating treatment days, imaging, hearing and laboratory studies.

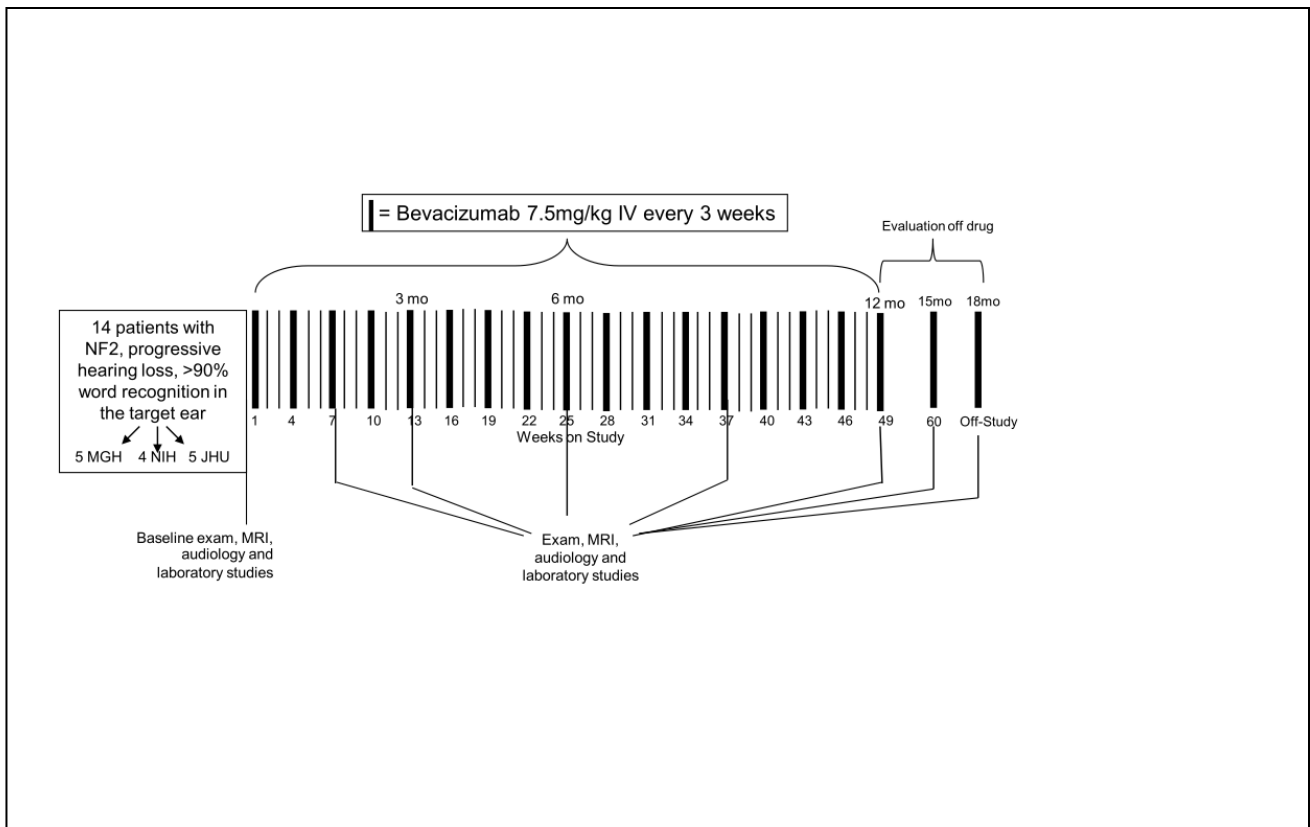

1  
2  
3  
4  
5  
6  
7  
8  
9  
10  
11  
12  
13  
14  
15  
16  
17  
18  
19  
20  
21  
22  
23  
24  
25  
26  
27  
28  
29  
30  
31  
32  
33  
34  
35  
36  
37  
38  
39  
40  
41  
42  
43  
44  
45  
46  
47  
48

Précis

Background

- Patients with neurofibromatosis type 2 (NF2) develop tumors of the central and peripheral nervous system, including vestibular schwannomas, meningiomas, and ependymomas. Bilateral vestibular schwannomas (VSs) are the hallmark of NF2. As these tumors enlarge, they cause sensorineural hearing loss and, ultimately, complete deafness. The standard treatment options for VS include surgery, and in select cases radiation, which often result in hearing loss, cranial nerve dysfunction and other neurologic disability.
- Vestibular schwannomas demonstrate an angiogenic pattern of vasculature with increased microvascular density and size. Immunohistochemical studies show that 100% of tumors express vascular endothelial growth factor (VEGF). Our initial experience treating ten NF2 patients at risk for complete hearing loss with bevacizumab outside of a clinical trial showed promising results with 4/7 evaluable patients having significantly improved word recognition scores and 6/10 patients experiencing  $\geq 20\%$  reduction in tumor volume and 4/7 evaluable patients having significantly improved word recognition scores.
- Bevacizumab is a humanized IgG1 monoclonal antibody that binds all biologically active isoforms of human vascular endothelial growth factor (VEGF) with high affinity.

Objectives

- To determine the proportion of patients with hearing improvement with bevacizumab in patients with progressive hearing loss due to VS as assessed by word recognition scores.
- To determine the proportion of patients with radiographic improvement (decrease in VS volume by  $\geq 20\%$ ) in VS with bevacizumab.
- To assess the safety and tolerability of bevacizumab 7.5mg/kg every 3 weeks for 12 months in patients with NF2 and progressive hearing loss.
- To explore the durability of response in both hearing and decreased tumor volume.
- To dissect the specific effect of bevacizumab treatment on the auditory system.
- To explore the biological effects of bevacizumab by measuring:
  - perfusion, permeability and vessel diameter using MRI tools including dynamic contrast enhanced (DCE) and apparent diffusion coefficient (ADC) measurements.
  - levels of circulating endothelial cells (CECs), circulating progenitor cells (CPCs), and plasma proteins (VEGF-A, VEGF-C, sVEGFR1, sVEGFR2, sVEGFR3, Col IV, SDF1a, IL-1beta, IL-6, IL-8, TNFalpha, G-CSF, Ang1, Ang2, sTie2, s-cKIT, MMP-1, MMP-2, MMP-3, MMP-9, MMP-10, PlGF, and bFGF ).
- To explore the impact of bevacizumab therapy on health and hearing related quality of life (QOL) measures.
- To explore patient motivations and expectations for participation in a therapeutic trial for NF2

Eligibility

Adult and pediatric patients (12 years and older) with NF2 and evidence of active disease, defined as progressive hearing loss (with decrease in word recognition score) related to VS (i.e., not due to prior interventions such as surgery or radiation) in the preceding 24 months with a

1 word recognition score of <90% in the affected ear that is confirmed with study-specific  
2 audiometry testing. Patients with a progressive VS affecting their only hearing ear are  
3 considered particularly appropriate study candidates.  
4

#### 5 Design

- 6 · Bevacizumab will be administered intravenously at a dose of 7.5 mg/kg every three  
7 weeks (6 weeks = 1 treatment cycle).
- 8 · Response will be evaluated using the primary endpoint of hearing response (defined as  
9 exceeding the 95% critical difference for word recognition score) at 3-month intervals.
- 10 · The secondary endpoints will include:
  - 11 ○ Tolerability and safety
  - 12 ○ Radiographic response (defined as  $\geq 20\%$  decrease in tumor volume by MRI  
13 scan)
  - 14 ○ Vascular permeability ( $K^{\text{trans}}$ ), relative cerebral blood volume/flow, mean transit  
15 time, and mean vessel diameter will be determined before and during therapy  
16 using perfusion-weighted MRI.
  - 17 ○ Changes in levels of circulating CECs, CPCs, VEGFR2+ monocytes and plasma  
18 proteins will be determined before and during therapy.
  - 19 ○ Patient reported QOL measures related to hearing including the Speech, Spatial  
20 and Qualities of Hearing Scale (SSQ), Tinnitus scale and the Short Form Health  
21 Survey-36.

1           ○  
2           ○

3 TABLE OF CONTENTS

|    | Page |
|----|------|
| 4  |      |
| 5  |      |
| 6  | 3    |
| 7  |      |
| 8  | 4    |
| 9  |      |
| 10 | 9    |
| 11 | 9    |
| 12 | 9    |
| 13 |      |
| 14 | 9    |
| 15 | 9    |
| 16 | 12   |
| 17 | 12   |
| 18 | 13   |
| 19 | 14   |
| 20 | 15   |
| 21 | 16   |
| 22 | 17   |
| 23 | 25   |
| 24 | 27   |
| 25 |      |
| 26 | 32   |
| 27 | 32   |
| 28 | 34   |
| 29 | 36   |
| 30 |      |
| 31 | 36   |
| 32 | 36   |
| 33 | 36   |
| 34 |      |
| 35 | 37   |
| 36 | 37   |
| 37 | 40   |
| 38 | 40   |
| 39 | 41   |
| 40 | 41   |
| 41 |      |
| 42 | 41   |
| 43 |      |
| 44 | 45   |
| 45 | 45   |
| 46 | 49   |
| 47 | 50   |
| 48 | 52   |

|    |      |                                                        |    |
|----|------|--------------------------------------------------------|----|
| 1  | 7.5  | Secondary AML/MDS .....                                | 52 |
| 2  |      |                                                        |    |
| 3  | 8.   | PHARMACEUTICAL INFORMATION.....                        | 52 |
| 4  | 8.1  | Bevacizumab (NSC#704865).....                          | 52 |
| 5  | 8.2  | Availability.....                                      | 53 |
| 6  | 8.3  | Agent Ordering.....                                    | 53 |
| 7  | 8.4  | Agent Accountability .....                             | 53 |
| 8  |      |                                                        |    |
| 9  | 9.   | CORRELATIVE/SPECIAL STUDIES .....                      | 54 |
| 10 | 9.1  | Laboratory Correlative Studies.....                    | 54 |
| 11 | 9.2  | Special Studies.....                                   | 57 |
| 12 |      |                                                        |    |
| 13 | 10.  | STUDY CALENDAR .....                                   | 59 |
| 14 |      |                                                        |    |
| 15 | 11.  | MEASUREMENT OF EFFECT .....                            | 61 |
| 16 | 11.1 | Definitions .....                                      | 61 |
| 17 | 11.2 | Disease Parameters.....                                | 61 |
| 18 | 11.3 | Methods for Evaluation of Measurable Disease .....     | 62 |
| 19 | 11.4 | Response Criteria .....                                | 62 |
| 20 | 11.5 | Duration of Response .....                             | 65 |
| 21 |      |                                                        |    |
| 22 | 12.  | DATA REPORTING /REGULATORY CONSIDERATIONS.....         | 65 |
| 23 | 12.1 | Data Reporting.....                                    | 65 |
| 24 | 12.2 | CTEP Multicenter Guidelines .....                      | 66 |
| 25 | 12.3 | Cooperative Research and Development Agreement (CRADA) |    |
| 26 |      | Clinical Trials Agreement (CTA) .....                  | 67 |
| 27 |      |                                                        |    |
| 28 | 13.  | STATISTICAL CONSIDERATIONS .....                       | 69 |
| 29 | 13.1 | Study Design/ Primary Endpoint .....                   | 69 |
| 30 | 13.2 | Accrual/Patient Replacement .....                      | 70 |
| 31 | 13.3 | Analysis of Secondary Objectives.....                  | 70 |
| 32 | 13.4 | Safety Monitoring.....                                 | 72 |
| 33 |      |                                                        |    |
| 34 |      | APPENDICES                                             |    |
| 35 |      |                                                        |    |
| 36 |      | APPENDIX A                                             |    |
| 37 |      | Performance Status Criteria .....                      | 73 |
| 38 |      |                                                        |    |
| 39 |      | APPENDIX B                                             |    |
| 40 |      | CTEP Multicenter Guidelines.....                       | 74 |
| 41 |      |                                                        |    |
| 42 |      | APPENDIX C                                             |    |
| 43 |      | Hearing Response Guidelines .....                      | 76 |
| 44 |      |                                                        |    |
| 45 |      | APPENDIX D                                             |    |
| 46 |      | Audiology Procedures.....                              | 78 |
| 47 |      |                                                        |    |
| 48 |      | APPENDIX E                                             |    |

|    |                                                                                 |     |
|----|---------------------------------------------------------------------------------|-----|
| 1  | MRI Protocols .....                                                             | 83  |
| 2  |                                                                                 |     |
| 3  | APPENDIX F                                                                      |     |
| 4  | Grading and management of hypertension and evaluation and of bony toxicity with |     |
| 5  | volumetric MRI of the growth plates in children 12 through 17 years old.....    | 86  |
| 6  |                                                                                 |     |
| 7  | APPENDIX G                                                                      |     |
| 8  | Data and Safety Monitoring Plan.....                                            | 91  |
| 9  |                                                                                 |     |
| 10 | APPENDIX H                                                                      |     |
| 11 | Short Form Health Survey-36.....                                                | 96  |
| 12 |                                                                                 |     |
| 13 | APPENDIX I                                                                      |     |
| 14 | Speech, Spatial and Qualities of Hearing Scale.....                             | 100 |
| 15 |                                                                                 |     |
| 16 | APPENDIX J                                                                      |     |
| 17 | Tinnitus Reaction Questionnaire.....                                            | 101 |
| 18 |                                                                                 |     |
| 19 | APPENDIX K                                                                      |     |
| 20 | Evaluation of Vestibular Nerve Function .....                                   | 103 |
| 21 |                                                                                 |     |
| 22 | APPENDIX L                                                                      |     |
| 23 | Patient Experience in an Experimental Therapeutic Clinical Trial.....           | 107 |
| 24 |                                                                                 |     |
| 25 | APPENDIX M                                                                      |     |
| 26 | Patient Eligibility Checklist .....                                             | 108 |
| 27 |                                                                                 |     |
| 28 | REFERENCES.....                                                                 | 112 |
| 29 |                                                                                 |     |



1  
2  
3  
4  
5  
6  
7  
8  
9  
10  
11  
12  
13  
14  
15  
16  
17  
18  
19  
20  
21  
22  
23  
24  
25  
26  
27  
28  
29  
30  
31  
32  
33  
34  
35  
36  
37  
38  
39  
40  
41  
42  
43  
44  
45  
46  
47

1. OBJECTIVES

1.1. Primary Objective

The primary objective of this study is to determine the activity of bevacizumab for treatment of symptomatic vestibular schwannomas (VS) defined as progressive hearing loss in patients with neurofibromatosis type 2 (NF2) based on objective hearing response.

1.2. Secondary Objectives

The secondary objectives are:

- determine the safety and tolerability of bevacizumab in this patient population on an every three week dosing schedule of 7.5mg/kg for 12 months of therapy;
- assess the rate of radiographic response ( $\geq 20\%$  reduction in volume);
- determine the growth rate of VS using volumetric MRI analysis in comparison to 1-dimensional and 2-dimensional measurements;
- assess changes in function of the auditory system during bevacizumab treatment;
- assess the vascular permeability ( $K^{trans}$ ), relative cerebral blood volume/flow, mean transit time, and mean vessel diameter from perfusion-weighted MRI;
- assess the change in circulating endothelial cells, circulating progenitor cells, and plasma angiogenic proteins in subjects receiving bevacizumab treatment;
- observe the impact of bevacizumab on non-VS tumors in patients with NF2 via whole body MRI;
- explore hearing related QOL measures throughout treatment;
- explore the effect of treatment with bevacizumab on vestibular function (to be evaluated at NCI only)

2. BACKGROUND

2.1 Neurofibromatosis type 2 (NF2)

An estimated 43,800 primary brain tumors were diagnosed in 2005 and 16,600 (38%) of these tumors were meningiomas or nerve sheath tumors. Surprisingly, meningiomas and vestibular schwannomas (VSs) are as common as all types of gliomas combined (1).

Neurofibromatosis 2 (NF2) is a tumor suppressor syndrome characterized by multiple schwannomas, meningiomas, and ependymomas. The birth prevalence is estimated to be 1 in 25,000 births and NF2 affects more than 10,000 individuals in the United States. The average age at onset of symptoms is 17 to 21 years.

Despite the benign histology of schwannomas, meningiomas, and ependymomas, NF2 patients experience significant morbidity and mortality related to their disease. Actuarial survival after diagnosis of NF2 is 85% at 5 years, 67% at 10 years, and 38% at 20 years (2). Bilateral VSs are the hallmark of NF2. As these tumors enlarge, they cause sensorineural hearing loss and, ultimately, complete hearing loss.

1 In addition, half of all NF2 patients have intracranial meningiomas and 75% have  
2 spinal tumors (i.e., schwannomas, meningiomas, ependymomas). Most patients  
3 require multiple surgeries during their lifetime. Morbidity related to NF2 is severe  
4 and includes early deafness, facial weakness (often resulting in poor chewing and  
5 swallowing and therefore, requiring PEG tube placement), blindness, seizures,  
6 hemiparesis and ultimately death related to the progression of tumors or  
7 complications of treatment.

8  
9 There are two forms of hearing loss in patients with NF2. Gradual hearing loss is  
10 the rule, and it most commonly occurs with progression of tumor size over time.  
11 Although there is a rough correlation with tumor size, gradual hearing loss can occur  
12 with tumors of any size. Although surgical implantation of cochlear and auditory  
13 brainstem implants provides benefit for a small minority of patients, there is no  
14 widely effective treatment for this type of hearing loss. In addition, some patients  
15 can experience episodes of sudden hearing loss superimposed on baseline hearing  
16 dysfunction. Treatment with a short course of corticosteroids can often correct this  
17 acute hearing loss. The mechanism of acute hearing loss is not clearly understood  
18 but probably involves compression of the auditory nerve from tumor mass and  
19 associated edema. Previous studies of pressure within the internal auditory canal  
20 (IAC) of patients with VSs suggest that intracannalicular pressure is directly  
21 correlated with the amount of tumor in the IAC and may be inversely associated with  
22 preoperative hearing (3). Thus, therapies that reduce edema, a common cause of  
23 increased pressure in brain tumors, are a rational approach to treating hearing loss in  
24 NF2 patients.

25  
26 Current standard therapy for patients with NF2 is observation for stable tumors  
27 without neurologic symptoms. Surgery is the standard of care for progressive,  
28 symptomatic VS. Due to the large number of tumors encountered in the brain and  
29 spinal cord, surgical removal of all tumors is not possible or advisable. Iatrogenic  
30 morbidity after surgery for NF2-related lesions is, unfortunately, relatively common  
31 due to the intimate association between tumors and vital neurologic structures. For  
32 example, complete surgical resection of VSs often results in ipsilateral hearing loss  
33 except in a minority of tumors that are smaller than 1.5 cm and smooth in outline. In  
34 addition,, facial palsy, spinal fluid leaks and infection are all common complications  
35 of VS resection. As almost all patients with NF2 have bilateral vestibular  
36 schwannoma, a common scenario is early surgery for VS resection on the most  
37 active side with observation of the second VS. This often results in hearing loss on  
38 the side of surgery. When there is later progression of the contralateral VS, there is  
39 imminent risk of complete deafness. The current options for treatment at that time  
40 are surgery or radiation therapy. However, surgery carries a high risk of deafness  
41 itself as discussed above. In fact, specialists in NF2 associated tumors recommend  
42 nonoperative management of lesions in the only hearing ear whenever possible and  
43 reserve surgery for select situations, such as extensive brainstem compression (4).

44  
45 Radiation has been used in a subset of tumors that progress despite surgical  
46 treatment or in individuals who are considered high risk for surgical complications.  
47 However, this modality should be used with caution since secondary malignancies  
48 after treatment have been reported (5). Specifically, the prevalence of nervous

1 system malignancy is very rare in population studies of NF2. In one study, 9 of  
2 1242 cases reviewed across centers in North America and Europe were found to  
3 have a nervous system malignancy and the risk was limited to MPNST (compared to  
4 the general population) (6). In contrast, after radiation therapy for benign tumors  
5 such as vestibular schwannoma, roughly 5 of 106 patients developed a secondary  
6 malignancy. Hence, the prevalence of nervous system malignancies spontaneously  
7 in NF2 was 725 per 10<sup>5</sup> (95% confidence interval (CI) 253–1197 per 10<sup>5</sup>) and after  
8 exposure to radiation therapy it was estimated at 4717 per 10<sup>5</sup> (95% CI 681–8753  
9 per 10<sup>5</sup>). This increase in incidence of nervous system malignancies is hypothesized  
10 to be related to the loss of the tumor suppressor gene in NF2 allowing greater  
11 susceptibility to the ionizing effects of radiation therapy (6). To date, more than 20  
12 cases of malignancies (i.e. glioblastoma multiforme, rhabdomyosarcomas, malignant  
13 meningiomas) have been reported in patients with NF2 undergoing radiation therapy  
14 (7-12).

16 Regarding efficacy, retrospective single-center reviews suggest that stereotactic  
17 radiation can result in moderate rates of tumor control and poor long term hearing  
18 preservation. The best long term data is estimated from a center in Sheffield,  
19 England. They reported on 122 vestibular schwannomas in 92 patients with NF2  
20 treated with RT and estimated tumor control at 8 years to be 50%. At 3 years they  
21 estimated 40% of patients to have preserved hearing, 40% of patients to have  
22 progressive hearing loss and 20% to have progressed to deafness. The long term risk  
23 of facial palsy was 5% (Rowe et al, 2008). In another study of 62 patients with NF2-  
24 related VS treated with stereotactic radiation therapy, hearing preservation was  
25 reported to be 73% at 1 year, 59% at 2 years, and 48% at 5 years after radiosurgery.  
26 Facial neuropathy occurred in 8% of patients (13). Overall, the data suggests that  
27 there can be short term tumor control and short term hearing preservation but that the  
28 long term efficacy (>5 years) of radiation therapy for NF2-related VS is moderate  
29 (<50% of patients with hearing) and there are unique risks with radiation therapy in  
30 NF2 patients including increased risk of secondary nervous system malignancy.  
31 There is currently no agreement in the field about the optimal timing and use of  
32 radiation therapy for NF2 patients, however most multidisciplinary specialty centers  
33 do not recommend this modality unless there are no other treatment options.

35 There are no known effective medical treatments for NF2-related tumors and no  
36 clinical trials with agents specifically targeting NF2-related vestibular schwannomas  
37 and hearing function have been performed in the past. Given the significant  
38 limitations of surgery and radiation therapy, and the devastating impact of these  
39 tumors, medical treatments are desperately needed. We have recently identified  
40 VEGF inhibition as a possible therapy. The initial experience treating ten NF2  
41 patients at risk for complete hearing loss with bevacizumab outside of a clinical trial  
42 showed promising results with 6/10 patients experiencing  $\geq 20\%$  reduction in tumor  
43 volume and 4/7 evaluable patients having significantly improved word recognition  
44 scores (14). This study will provide preliminary, prospective data about the effect of  
45 bevacizumab in this group of patients (progressive hearing loss due to VS in patients  
46 with NF2) confirming the retrospective data reported, estimating the effects of  
47 bevacizumab on hearing, tumor size and quality of life and exploring possible  
48 biomarkers of this disease and its response to therapy.

1  
2 2.2 Children and NF2

3 NF2 is traditionally thought to present in young adults. However, registry data has  
4 shown that 18% of patients with newly diagnosed NF2 are under the age of 15 years  
5 (15). Although manifestations of NF2 in children generally involve skin and  
6 ophthalmologic findings, there is an association between early development of  
7 symptoms and prognosis (16-18). There are rare cases with fulminant disease  
8 progression very early in life for which the currently available treatments of surgery  
9 and radiation therapy are insufficient resulting in significant neurologic morbidity or  
10 death due to relentless progression of tumor (19, 20). In one series of 12 patients  
11 diagnosed with NF2 before 18 years old, there was a high tumor burden with >75%  
12 of patients having vestibular schwannomas, other cranial nerve schwannomas or  
13 spinal cord tumors (21). At least 75% of the children had hearing loss and in the  
14 58% of patients who underwent surgery for VS, none had preserved hearing post-  
15 operatively. Hence, the limited literature regarding NF2 in children suggests that  
16 there is a subpopulation that presents with early and severe disease.  
17

18 2.3 Hearing loss and NF2

19 Hearing loss is a critical problem for patients with NF2. Unlike patients with  
20 sporadic VSs who can function with unilateral hearing loss, patients with NF2 are at  
21 risk for complete deafness. This hearing loss typically occurs during late adolescence  
22 or early adulthood and leads to social isolation and underemployment. Although  
23 hearing loss is related to VSs, the degree of hearing sensitivity (threshold) is only  
24 loosely correlated with tumor size. This dissociation may be due to direct  
25 compression of the auditory nerve, presence of intratumoral edema, disruption of  
26 blood flow to the cochlea, degeneration of certain cochlear structures, and distortion  
27 of auditory centers in the brainstem. There is evidence that the cochlea, as well as  
28 the 8<sup>th</sup> cranial nerve, is a site of both cell degeneration and the accumulation of  
29 precipitate in cases of VS (22). This means that sites anywhere along the auditory  
30 pathways—from the periphery to the brainstem—may contribute to the observed  
31 loss of hearing function. Thus, we will use the full range of audiologic diagnostic  
32 tools available to assess function of the pathway.  
33

34 Hearing is monitored in clinical practice by measuring pure tone thresholds, word  
35 recognition scores, brainstem auditory evoked responses (BAERs), and otoacoustic  
36 emissions (OAEs).  
37

38 Pure tone thresholds measure the minimum sound level that an ear can perceive.  
39 Thresholds are typically measured at octaves and half-octaves from 250 Hz to 8000  
40 Hz. An average of thresholds at 500, 1000, 2000 and 4000 Hz (PTA) can be used to  
41 characterize pure tone thresholds.  
42

43 Word recognition scores measure the ability to recognize (as opposed to detect)  
44 auditory information. Patients are presented a list of 100 words at a level determined  
45 to yield the maximum score and the percentage identified correctly is the score. NF2  
46 patients may exhibit “rollover” where the score decreases at a fully audible level so  
47 we will do a full 50 word list at the fully audible (high) level, and one additional 50  
48 word list at a level 10-15dB below that level (the low level). An additional 50 words

1 will be added at the level of the highest score; the total of this list and the list on  
2 which the patient initially scored highest will generate a 100 word list which will be  
3 used and compared across visits. This study will use monosyllable lists and  
4 standardized recordings.

5  
6 Otoacoustic emissions (OAEs) are sounds that are generated from within the  
7 cochlea as it acts to amplify incoming sounds. OAEs are a sensitive measure of  
8 cochlear health and often disappear after the cochlea has been damaged. The  
9 presence (significantly above noise-floor) of measurable emissions, called distortion  
10 product otoacoustic emissions (DPOAEs) across frequencies from 1000 to 8000 Hz  
11 will be used as an indicator of functioning cochlear regions.

12  
13 Because tumors associated with NF2 have benign histology, overall survival is not  
14 an appropriate endpoint for clinical trials in this condition. Instead, the goal of  
15 treatment is to minimize neurologic morbidity (including hearing loss) and to defer  
16 surgical treatments that may cause iatrogenic dysfunction. For this reason, hearing  
17 function is the most important way to monitor the activity of new agents designed to  
18 treat VSs.

19  
20 Word recognition is the measure most closely associated with daily hearing function  
21 since it measures the ability to comprehend speech (rather than “detect” it). If word  
22 recognition quality improves, the patient can converse successfully, even if a hearing  
23 aid is needed to make sounds sufficiently loud. Statistical methods have been  
24 developed to determine significant changes in this measure. Word recognition scores  
25 represent summary scores from a collection of binary endpoints (correct/incorrect  
26 responses) and thus follow a binomial distribution (e.g., non-Gaussian distribution).  
27 Although it is tempting to use a set change in word recognition score (e.g., fifteen  
28 percentage points) as a clinical response, this approach is inappropriate given the  
29 binomial model of variance. A more rigorous approach involves the use of the 95%  
30 ( $p=0.05$ ) critical difference table (23) (Appendix C). The 95% critical differences  
31 have been used in previous studies (24) and in clinical trials evaluating the effect of  
32 drug treatment on hearing.

#### 33 34 2.4 Angiogenesis and Imaging

35 Although many clinicians believe that hearing loss related to VSs is irreversible, there  
36 are cases with transient hearing restoration after a course of corticosteroids or  
37 decompression of the auditory canal without removal of the tumor. Our preliminary  
38 observations indicate that neutralizing VEGF can reverse profound hearing loss and  
39 subsequently maintain hearing. Based on these experiences, we hypothesize that the  
40 restoration of hearing function with bevacizumab is in part due to reduction in  
41 intraneural edema that compresses the auditory nerve. In this proposal we will  
42 investigate the mechanism(s) by which bevacizumab inhibits tumor growth and/or  
43 induces hearing recovery using advanced MRI techniques specifically designed to  
44 assess the vascular profile of tumors and the tumor environment.

45  
46 Internal auditory canal (IAC) imaging. The vestibular and auditory nerves together  
47 comprise the 8<sup>th</sup> cranial nerve. The nerve exits the posterior brainstem, travels  
48 through the subarachnoid space in the IAC to terminate in the cochlea (auditory

1 nerve) and semicircular canals (vestibular nerve). Detailed imaging of the IAC is  
2 essential to identify and follow VSs in patients with NF2. MRIs must therefore  
3 include thin cuts through the IAC (3mm, no skip) in addition to the traditional pre-  
4 and post-contrast images (5 mm, 1 mm skip) that are performed for malignant brain  
5 tumors.  
6

7 Volumetric analysis. Traditionally, VSs have been measured using either 1-  
8 dimensional measurements (in the long axis) or 2-dimensional measurements  
9 (calculated by taking the square root of the product of the short axis \* long axis  
10 measured to the plane perpendicular to the face of the temporal bone) (25). However,  
11 the irregular shape of VSs, as determined by the unique anatomy of the IAC and  
12 cerebellopontine angle, makes it difficult for linear measurements to accurately and  
13 fully represent growth for the entire tumor. As a result, VS growth may be  
14 underestimated by linear measurement criteria. Semi-automated volumetric analysis  
15 overcomes these limitations since it uses data from 3 dimensions. The coefficient of  
16 variation (COV) ranges from 0.6% to 6.8% and is generally below 5% for lesions  
17 greater than 1 cc (26). Volumetric analysis not only better reflects tumor size, but  
18 also allows accurate detection of smaller changes in tumor size compared to standard  
19 solid tumor response criteria (e.g., RECIST criteria). This ability to detect small  
20 changes in size is critical for tumors with slow growth rates such as VS, and, when  
21 used in clinical trials, helps limit exposure to potentially toxic and/or inactive agents.  
22 Trials for NF-related tumors, such as plexiform neurofibromas, are now routinely  
23 using volumetric changes as the primary endpoint, typically choosing a 20% increase  
24 for progression and 20% decrease for radiographic response (27-29).  
25

26 Vascular imaging. The development of anti-angiogenic therapies for tumors has led  
27 to a demand for imaging-based surrogate markers. It has been shown that T2\*-  
28 weighted MRI scans are highly reproducible, and can be applied repeatedly to assess  
29 novel therapies in clinical trials (30). In addition to measuring the size of tumors with  
30 post-contrast images, dynamic contrast enhanced (DCE)-MRI can be used to measure  
31 the permeability of tumor vessels. This technique has been used to measure changes  
32 in the area under the contrast concentration vs. time curve (AUC) in patients with a  
33 variety of brain tumors including VSs, meningiomas, and gliomas (31). Thus, it is  
34 technically feasible to use DCE-MRI to image tumors in the posterior fossa.  
35 Furthermore, the technique has been used in cancer patients receiving anti-angiogenic  
36 drugs such as SU5416 (32) and EMD 121974 (33), and within our own group with  
37 AZD2171 (34). Thus, these imaging modalities have become integral for many  
38 clinical trials assessing anti-angiogenic therapies for brain tumors.  
39

## 40 2.5 Plasma Markers

41 The discovery of mechanism-based biomarkers can facilitate the efficient  
42 development of new anti-cancer medicines and potentially serve as true intermediate  
43 or surrogate end points for future clinical trials. Our study and others suggest that  
44 there are dose- and time-dependent increases in soluble VEGF and PlGF and  
45 decreases in soluble VEGFR following treatment with anti-angiogenic agents (34-38).  
46 Others have shown that circulating biomarkers can help predict tumor progression.  
47 For example, treatment with a VEGF aptamer in a preclinical model of angiogenesis  
48 revealed an upregulation of bFGF (39). This suggests that even in non-malignant

1 disease, compensatory upregulation of proangiogenic factors can develop during anti-  
2 angiogenic treatment.

3  
4 Biomarkers of anti-angiogenic therapy in non-malignant disorders. To date, the  
5 only non-malignant disorder that is routinely treated with bevacizumab or other anti-  
6 VEGF agents is age-related wet macular degeneration. Although levels of  
7 angiogenesis-related protein have been measured in the vitreous of some patients,  
8 systemic levels of cytokines have not been followed since those patients receive local  
9 injections (40) . In this study we propose to follow patients with multiple benign  
10 tumors treated systemically. These tumors are slow growing and do not present the  
11 same genetic instability as seen in malignant tumors, we therefore do not expect the  
12 same level of “adaptation” to VEGF deprivation.

13  
14 While there are no published reports on circulating cells in patients with NF2, several  
15 studies have shown higher intratumoral levels of progenitor cells. Our study will  
16 provide the first data in this patient population. Since patients with NF2 have multiple  
17 tumors and multiple tumor types, this information will be used to provide baseline  
18 levels and preliminary data for three factors: (i) as an indication of systemic response  
19 to treatment, where levels of VEGF and Plgf are expected to increase; (ii) as a marker  
20 of toxicity, since NF2 could potentially be treated for extended periods of time; and  
21 (iii) as a correlate to the functional MRI in order to further our understanding of the  
22 mechanisms of action of bevacizumab on tumor-associated vasculature. Although an  
23 increase of alternate angiogenic growth factor might not be directly attributable to the  
24 target vestibular schwannoma, this information will provide functional information  
25 when paired with changes in  $K^{\text{trans}}$  on perfusion MRI.

## 26 27 2.6 Whole Body Magnetic Resonance Imaging

28 Many patients with NF2 have a high burden of tumor. Although the hallmark of the  
29 disease is VS and progression of VS is the leading cause of morbidity and mortality  
30 in NF2, several other tumor types contribute to functional decline in NF2, including  
31 ependymomas, spinal schwannomas and peripheral schwannomas. In a recent study  
32 assessing the feasibility of whole body MRI to measure tumor burden in the  
33 neurofibromatoses, 6 of 14 patients (43%) with NF2 were found to have at least one  
34 peripheral tumor (41). Across all patients, the median number of peripheral tumors  
35 was 1 plexiform and 3 discrete tumors. However, in select patients the tumor burden  
36 was much higher (up to 63 tumors). Many patients with advanced VS at a young age  
37 will also have peripheral tumors (42). The advent of whole body MRI allows  
38 screening of NF2 patients for evidence of peripheral tumors and comparison between  
39 baseline and post-treatment tumor volumes (41).

40  
41 There has been an increasing amount of evidence about the expression of VEGF in  
42 VS and the relationship between VEGF expression and tumor growth (14, 43-45).  
43 However, the expression of VEGF and influence of VEGF expression on tumor  
44 behavior is less well understood for peripheral schwannomas. Relatively low levels of  
45 VEGF mRNA expression or VEGF positive staining via immunohistochemistry were  
46 found in neurofibromas (n=14) or schwannomas (n=19) compared to MPNST (n=22)  
47 (46) . Another study found that 3/6 schwannoma samples stained positive for VEGF  
48 and 4/6 were positive for VEGFR-1 or -2, however, there was no correlation with

1 clinical course (47). In the only study to directly assess the VEGF expression in NF2  
2 associated versus sporadic peripheral schwannomas, 8/10 schwannomas from patients  
3 with confirmed or presumed NF2 stained positive for VEGF. All 10 sporadic  
4 schwannomas investigated stained positive for VEGF and there was no significant  
5 difference between sporadic and NF2 associated peripheral schwannomas in mitotic  
6 index or microvascular density (48).

7  
8 Our anecdotal clinical experience has been that some patients appear to have benefit  
9 in symptomatic peripheral schwannomas when being treated with bevacizumab for  
10 VS, but others do not. The development of whole body MRI technology allows  
11 detection of peripheral tumors with decreased risk to patients (peripheral tumors are  
12 visualized on STIR images that do not require exogenous contrast) and enhanced  
13 convenience (roughly 45 minute scan time). A screening MRI at baseline will allow  
14 identification of NF2 patients with peripheral tumor involvement. In patients with  
15 identified tumors (sensitivity cut-off is >2cm in size), follow-up whole-body MRIs  
16 will be done at 24 and 48 weeks. This will allow observation of whether peripheral  
17 tumors respond to treatment with bevacizumab. Such data will serve as preliminary  
18 information that may help the design of future trials for peripheral nerve sheath  
19 tumors.

## 20 21 2.7 Patient Hearing, Vestibular Function and Health Related Quality of Life

22 One of the major threats to quality of life in patients with NF2 is loss of hearing.  
23 Although early adulthood onset deafness is recognized by experts in the field as a  
24 major factor impacting quality of life (QOL) in NF2, this has not yet been directly  
25 assessed in this population (49, 50). There are studies assessing quality of life in  
26 patients with late onset hearing loss without NF2. These studies suggest that in adults  
27 with hearing loss, there is an association between degree of hearing impairment and  
28 social isolation, perceived disability and depression (51, 52). Moreover, there is some  
29 indication that although patients with late-onset hearing loss have decreased reported  
30 QOL at baseline, there is the possibility for improvement with effective therapies (51,  
31 52). Studies in patients receiving cochlear implants for adult onset hearing loss  
32 suggest that specific improvement in functions such as communication abilities  
33 directly influenced perceived quality of life (53). Hence, it appears that for the most  
34 informative view of the impact of hearing dysfunction (and possible improvement) on  
35 patient perceived QOL, both general measures of QOL as well as specific function-  
36 based questionnaires are the most beneficial (54).

37  
38 As noted above in section 2.3, word recognition score has been incorporated into the  
39 primary outcome because this variable is a direct measure of quality of life (e.g.,  
40 ability to comprehend speech). In addition, we will explore patient reported QOL  
41 with the Short Form Health Survey-36 as a global measure of health related QOL  
42 (SF-36, Appendix H), the Speech, Spatial and Qualities of Hearing Scale (SSQ,  
43 Appendix I), and the Tinnitus Reaction Questionnaire (TRQ, Appendix J) as specific  
44 patient reported measures of impact of therapy on function. Finally, we will include  
45 three questions about the patients' experience of being involved in this clinical trial to  
46 explore how involvement in an experimental therapeutic trial may be influencing  
47 perceived QOL and vice versa (Appendix L). In addition, vestibular function will be  
48 evaluated as detailed in Appendix K (for subjects enrolled at the NCI only).



1  
2 2.8

3 **Bevacizumab**

4 Bevacizumab is a humanized IgG1 monoclonal antibody (MAb) that binds all  
5 biologically active isoforms of human vascular endothelial growth factor (VEGF, or  
6 VEGF-A) with high affinity ( $k_d = 1.1$  nM) (55). The antibody consists of a human  
7 IgG1 framework and the antigen-binding complementarity-determining regions from  
8 the murine anti-VEGF MAb A.4.6.1 (55-57).

9 **Mechanism of Action**

10 Of known proangiogenic factors, VEGF is one of the most potent and specific, and  
11 has been identified as a crucial regulator of both normal and pathological  
12 angiogenesis. VEGF is a secreted, heparin-binding protein that exists in multiple  
13 isoforms. Action of VEGF is primarily mediated through binding to the receptor  
14 tyrosine kinases, VEGFR-1 (Flt-1) and VEGFR-2 (KDR/Flk-1). The biological  
15 effects of VEGF include endothelial cell mitogenesis and migration, increased  
16 vascular permeability, induction of proteinases leading to remodeling of the  
17 extracellular matrix, and suppression of dendritic cell maturation. Neutralization of  
18 VEGF by A.4.6.1 or bevacizumab has been shown to inhibit the VEGF-induced  
19 proliferation of human endothelial cells *in vitro*, and decrease microvessel density,  
20 microvessel diameter and interstitial pressure in tumor xenografts *in vivo* (58). In  
21 patients, preliminary results from a neoadjuvant trial in rectal cancer demonstrated a  
22 decrease in blood perfusion/permeability and interstitial fluid pressure in tumors after  
23 one dose of bevacizumab (35).

24  
25 **Nonclinical Studies**

26 The murine parent MAb of bevacizumab, A4.6.1, has demonstrated potent growth  
27 inhibition *in vivo* in a variety of human cancer xenograft and metastasis models,  
28 including those for SK-LMS-1 leiomyosarcoma, G55 glioblastoma multiforme, A673  
29 rhabdomyosarcoma, Calu-6, and MCF-7 cell lines (55, 56, 59, 60). The antitumor  
30 activity was enhanced with the combination of A4.6.1 and chemotherapeutic agents  
31 compared to either agent alone. Combined blockage of the VEGF and other growth  
32 factor pathways (e.g., EGFR or PDGFR) has also demonstrated additive effects *in*  
33 *vivo* (61, 62). Associated with the anti-tumor activity of anti-VEGF MAbs were  
34 findings of reduced intratumoral endothelial cells and microcapillary counts as well  
35 as reduced vascular permeability and interstitial pressure

36  
37 Nonclinical toxicology studies have examined the effects of bevacizumab on female  
38 reproductive function, fetal development, and wound healing. Fertility may be  
39 impaired in cynomolgus monkeys administered bevacizumab, which led to reduced  
40 endometrial proliferation and uterine weight as well as a decrease in ovarian weight  
41 and number of corpora lutea. Bevacizumab is teratogenic in rabbits, with increased  
42 frequency of fetal resorption, as well as specific gross and skeletal alterations. In  
43 juvenile cynomolgus monkeys with open growth plates, bevacizumab induced  
44 physeal dysplasia, which was partially reversible upon cessation of therapy.  
45 Bevacizumab also delays the rate of wound healing in rabbits. This effect appeared to  
46 be dose-dependent and characterized by a reduction of wound tensile strength.

47  
48 **Clinical Studies in Adults**

1 To date, over 7000 patients have been treated in clinical trials with bevacizumab as  
2 monotherapy or in combination regimens (57) .  
3

#### 4 Pharmacokinetics

5 The pharmacokinetics (PK) of bevacizumab have been characterized in several phase  
6 1 and phase 2 clinical trials, with doses ranging from 1 to 20 mg/kg administered  
7 weekly, every 2 weeks, or every 3 weeks. The estimated half-life of bevacizumab is  
8 approximately 21 days (range 11-50 days). The predicted time to reach steady state  
9 was 100 days. The volume of distribution is consistent with limited extravascular  
10 distribution.  
11

#### 12 Maximum Tolerated Dose

13 The maximum tolerated dose (MTD) of bevacizumab has not been determined;  
14 however, the dose level of 20 mg/kg was associated severe headaches (63). The dose  
15 schedule of either 10 mg/kg q2w or 15 mg/kg q3w is used in most phase 2 or 3 trials  
16 with only a few exceptions (e.g., the pivotal phase 3 trial in colorectal cancer, in  
17 which bevacizumab was given at 5 mg/kg q2w).  
18

#### 19 Clinical efficacy of bevacizumab

20 Clinical proof of principle for anti-VEGF therapy with bevacizumab has been  
21 observed in several solid tumors. In 1<sup>st</sup>- and 2<sup>nd</sup>-line metastatic colorectal cancer,  
22 combination of bevacizumab with 5-FU-based chemotherapy improved the overall  
23 survival (OS), progression-free survival (PFS) and response rate (RR) as compared to  
24 chemotherapy alone (64, 65). There was also improved overall survival in first-line  
25 non-small cell lung cancer (NSCLC) patients (E4599) treated with  
26 carboplatin/paclitaxel + bevacizumab compared with chemotherapy alone.  
27 Bevacizumab in combination with chemotherapy has been approved by the FDA for  
28 treatment in advanced/metastatic colorectal cancer (first and second lines) and in  
29 NSCLC.  
30

31 In untreated advanced and metastatic breast cancer, addition of bevacizumab to  
32 paclitaxel also significantly improved the RR and PFS (E2100) (66). However, in the  
33 phase 3 trial in doxorubicin and paclitaxel-refractory metastatic breast cancer, the  
34 addition of bevacizumab to capecitabine did not show an improvement in PFS despite  
35 an increase in the RR (66) . In locally advanced and metastatic pancreatic cancer, a  
36 Phase III also failed to demonstrate OS or PFS advantage by adding bevacizumab to  
37 gemcitabine (CALGB 80303) (67).  
38

39 Bevacizumab has been studied as monotherapy in renal cell cancer (mRCC). In a 3-  
40 arm, double-blind, placebo-controlled phase 2 trial (68), patients with previously  
41 treated stage IV RCC were randomized to high-dose (HD) bevacizumab (10 mg/kg  
42 q2w), low-dose (LD) bevacizumab (3 mg/kg q2w), or placebo. The study  
43 demonstrated a highly significant prolongation of time to progression (TTP) in the  
44 HD arm (4.8 months) as compared with the placebo (2.6 months) (hazard ratio = 2.55,  
45  $p = 0.0002$ ); the LD arm was associated with a smaller difference in TTP (3.0  
46 months) of borderline significance; the tumor response rate was 10% in the HD arm  
47 but 0% in the LD and placebo groups. A Phase III study (BO17705) with  
48 bevacizumab (10 mg/kg/q2w) + interferon-alpha 2a versus interferon-alpha 2a +

1 placebo as first-line therapy in patients with advanced and/or mRCC demonstrated  
2 statistically significant and clinically relevant improvements in progression-free  
3 survival (10.2 vs. 5.4 months), and objective response rate (31.4 vs. 12.8%).  
4

5 The Phase III study BO17706 indicated no statistically significant improvement in  
6 overall survival when bevacizumab (5 mg/kg/q2w) is added to the  
7 gemcitabine/erlotinib combination in the first-line treatment of advanced pancreatic  
8 cancer. The Phase III NCI-sponsored CALGB80303 study investigating the use of  
9 bevacizumab (10 mg/kg/q2w) combined with gemcitabine was prematurely  
10 terminated after the CALGB DSMB concluded that the futility boundary defined for  
11 the primary efficacy parameter (overall survival) had been crossed in a protocol-  
12 specified interim analysis (dated June 16th, 2006).  
13

14 Additional clinical trials are ongoing in a variety of solid tumors and hematological  
15 malignancies using bevacizumab as monotherapy or in combination with  
16 chemotherapy, radiation, or other targeted/biological agents. To date, there have been  
17 no published studies on the efficacy and toxicity of bevacizumab for VS,  
18 meningiomas, or ependymomas, or for patients with NF2.  
19

#### 20 Clinical Studies in Children

21 Bevacizumab has been studied in the pediatric population in 3 clinical trials and two  
22 retrospective reports to date. Across all of these studies, with evaluation periods  
23 ranging from 1 month to 2 years, there have not been any DLTs or major toxicities  
24 seen in children treated with bevacizumab.  
25

26 In a phase I trial in children with progressive solid tumors, 18 patients were  
27 assessable (received at least 1 course, 28 days, of treatment, range was 1-16 courses  
28 with a median of 3 courses). They evaluated doses of 5mg, 10mg or 15mg IV every 2  
29 weeks. There were no DLTs observed at any dose and non-dose limiting toxicities  
30 were limited to mild increase in blood pressure (not meeting CTCAEv3 criteria),  
31 infusional reaction, mucositis, rash, proteinuria and lymphopenia. Bone toxicity was  
32 evaluated and was not seen albeit over short periods of observation (1-3 months) (69).  
33

34 A retrospective study was then reported in children with refractory solid tumors in  
35 which bevacizumab was used between 2004 and 2006 (70). They found that across  
36 15 patients (median age 14 years) treated for 1-23 months and dosed at 5-10mg/kg  
37 every 2-3 weeks for largely nervous system based tumors, there were no reports of  
38 DLTs and that the toxicities seen were mild and included hypertonia,  
39 proteinuria/hematuria, epistaxis, infusion related erythema and poor wound healing in  
40 a total of 8 patients.  
41

42 Bevacizumab has been specifically evaluated in pediatric patients with brain disease.  
43 Packer et al studied bevacizumab and irinotecan in children with progressive low  
44 grade gliomas (71). The average age at treatment was 5 years old. Bevacizumab was  
45 doses at 10 mg/kg every 2 weeks and irinotecan at 125 mg/m<sup>2</sup> every 2 weeks. Six of  
46 10 patients remained on treatment for up to 22 months. There were two DLTs:  
47 transient leukoencephalopathy and grade 3 proteinuria. All other toxicities were non-  
48 dose-limiting toxicities (grade 1 and 2) included nausea and abdominal pain (2

1 patients) and increased obsessive/compulsive behaviors (1 patient), increased blood  
2 pressure (1 patient). There were no hemorrhages or bone toxicity seen with therapy  
3 up to 22 months.

4  
5 In another trial, children with resistant, high-risk neuroblastoma metastatic to the  
6 skeleton were treated with bevacizumab 15mg/kg every 2 weeks plus 131I-3F8. This  
7 trial is ongoing, but thus far the preliminary results for 7 children have been reported  
8 and they have not seen skeletal toxicity or other DLT related to bevacizumab (72).

9  
10 Finally, there is a brief report of 4 children with brainstem gliomas with presumed  
11 radiation induced necrosis treated with bevacizumab for a range of 1.5-7 months at a  
12 dose of 10mg/kg IV every 2 weeks (73). In this case series, there were 3 responses  
13 and no toxicities were reported.

14  
15 In summary, there is published data about 54 pediatric patients with various advanced  
16 solid tumors (many of them specifically brain tumors) at bevacizumab doses from 5-  
17 15mg/kg every 2-3 weeks for a duration of therapy ranging from 1-23 months and  
18 there have been no reports of severe toxicity. Based on this review of the available  
19 data, it appears that the risk to children from bevacizumab is relatively small. Given  
20 that the enrollment criteria for this protocol includes progressive hearing loss with  
21 growing vestibular schwannomas for which no other therapy is available and the  
22 observation of 60% radiographic response and 57% hearing response in the  
23 retrospective evaluation of bevacizumab for patients with progressive VS and NF2,  
24 we are of the opinion that the demonstrated small risk of bevacizumab is balanced by  
25 potential benefit. We do not feel the available data suggests that we are subjecting  
26 adult or pediatric patients to increased risk that would require an IND. We have  
27 added the summary of the pediatric investigation of bevacizumab to the protocol and  
28 IND exemption statement.

### 29 30 Safety Profile

31 Based on clinical trials with bevacizumab as monotherapy or in combination with  
32 chemotherapy, the most common adverse events of any severity include asthenia,  
33 pain, headache, hypertension, diarrhea, stomatitis, constipation, epistaxis, dyspnea,  
34 dermatitis and proteinuria. The most common grade 3-4 adverse events were asthenia,  
35 pain, hypertension, diarrhea and leukopenia.

36  
37 The major bevacizumab-associated adverse events identified in phase I to phase III  
38 trials include hypertension, proteinuria, arterial thromboembolic events, hemorrhage,  
39 congestive heart failure (CHF), gastrointestinal perforations, and wound healing  
40 complications. Other SAEs observed with bevacizumab therapy include reversible  
41 posterior leukoencephalopathy syndrome and fistula formation.

42 The following is a description of major adverse events associated with bevacizumab  
43 therapy. A list of Comprehensive Adverse Events and Potential Risks (CAEPR) in  
44 NCI-CTCAE v3.0 terms for bevacizumab is included in Section 7 of the protocol.  
45 Reference may also be made to the Investigators' Brochure and the FDA package  
46 insert ([www.fda.gov/cder/foi/label/2004/1250851bl.pdf](http://www.fda.gov/cder/foi/label/2004/1250851bl.pdf)).

1 Infusion-Related Reactions. Infusion reactions with bevacizumab were uncommon  
2 (<3%) and rarely severe (0.2%). Infusion reactions may include rash, urticaria, fever,  
3 rigors, hypertension, hypotension, wheezing, or hypoxia. Currently, there is no  
4 adequate information on the safety of retreatment with bevacizumab in patients who  
5 have experienced severe infusion-related reactions.  
6

7 Hypertension. Hypertension is common in patients treated with bevacizumab. The  
8 incidence of hypertension (all grade) is 20-30% across trials, with a mean increase of  
9 +5.5mmHg to +8.4mmHg for systolic pressure, or +4.1mmHg to +5.4mmHg for  
10 diastolic pressure. Incidence of grade 3 (hypertension requiring initiation of, or  
11 increase in, hypertensive medications) ranges from 7.8 to 17.9%. Grade 4  
12 hypertension (hypertensive crisis) occurred in up to 0.5% of bevacizumab-treated  
13 patients.  
14

15 Hypertension associated with bevacizumab can generally be controlled with routine  
16 oral drugs while bevacizumab is continued. However, incidents of hypertensive crisis  
17 with encephalopathy, including reversible posterior leukoencephalopathy syndrome  
18 (RPLS, see below), or cardiovascular sequelae have been rarely reported. Blood  
19 pressure (BP) should be closely monitored during bevacizumab therapy and the goal  
20 of BP control should be consistent with standard medical practice (74). Bevacizumab  
21 therapy should be suspended in the event of uncontrolled hypertension.  
22

23 Proteinuria. Proteinuria has been seen in all bevacizumab studies to date, ranging in  
24 severity from mild asymptomatic increase in urine protein (incidence of about 38%)  
25 to rare instances of either grade 3 proteinuria (> 3.5gm/24 hour urine) (3%) or  
26 nephrotic syndrome (1.4%). Pathologic findings on renal biopsies in two patients  
27 showed proliferative glomerulonephritis. The risk of proteinuria may be higher in  
28 patients with advanced RCC or history of hypertension. There is also evidence from  
29 dose-finding trials that the rate of proteinuria may be dose related. Proteinuria will be  
30 monitored by urine protein level using urine analysis dipstick.  
31

32 Hemorrhage. Overall, grade 3 and 4 bleeding events were observed in 4.0% of 1132  
33 patients treated with bevacizumab in a pooled database from eight phase I, II, and III  
34 clinical trials in multiple tumor types. The hemorrhagic events that have been  
35 observed in bevacizumab clinical studies were predominantly tumor-associated  
36 hemorrhage and minor mucocutaneous hemorrhage.

37 Tumor-associated hemorrhage. Major or massive pulmonary hemorrhage/hemoptysis  
38 has been observed primarily in patients with NSCLC. In a phase 2 study in NSCLC, 6  
39 cases of life-threatening (4 fatal) hemoptysis were reported among 66 patients treated  
40 with bevacizumab and chemotherapy (75); squamous cell histology was identified as  
41 the risk factor. In the phase III trial in non-squamous NSCLC (E4599), the rate of  
42 Grade  $\geq$  3 pulmonary hemorrhage was <1% in the control arm  
43 (carboplatin/paclitaxel) versus 2.3% in the chemotherapy plus bevacizumab arm  
44 (10/427 patients, including 7 deaths).  
45

46 Gastrointestinal hemorrhages, including rectal bleeding and melaena have been  
47 reported in patients with colorectal cancer, and have been assessed as tumor-

1 associated hemorrhages. In the pivotal phase 3 trial in advanced colorectal cancer, the  
2 rate of GI hemorrhage (all grades) was 24% in the IFL/bevacizumab arm compared to  
3 6% in the IFL arm; grade 3-4 hemorrhage was 3.1% for IFL/bevacizumab and 2.5%  
4 for IFL.

5  
6 Serious tumor associated bleedings have also been observed in patients with  
7 pancreatic cancer, gastric cancer, CNS metastases, hepatoma, or varices treated with  
8 bevacizumab.

9  
10 Mucocutaneous hemorrhage. Across all bevacizumab clinical trials, mucocutaneous  
11 hemorrhage has been seen in 20%-40% of patients treated with bevacizumab. These  
12 were most commonly NCI-CTC Grade 1 epistaxis that lasted less than 5 minutes,  
13 resolved without medical intervention, and did not require any changes in  
14 bevacizumab treatment regimen. There have also been less common events of minor  
15 mucocutaneous hemorrhage in other locations, such as gingival bleeding and vaginal  
16 bleeding.

17  
18 Arterial Thromboembolic Events (ATE). The risk of arterial thromboembolic events  
19 is increased with bevacizumab therapy; such events included cerebral infarction,  
20 transient ischemic attack (TIA), myocardial infarction (MI) and other peripheral or  
21 visceral arterial thrombosis. A pooled analysis of five randomized studies showed a  
22 two-fold increase in these events (3.8% vs. 1.7%). ATE led to a fatal outcome in  
23 0.8% patients with bevacizumab (vs. 0.5% without bevacizumab). The rate of  
24 cerebrovascular accidents (including TIA) was 2.3% vs. 0.5%, and the rates of MI  
25 1.7% vs. 0.7%. Certain baseline characteristics, such as age and prior arterial  
26 ischemic events, appear to confer additional risk (76). In patients  $\geq 65$  years treated  
27 with bevacizumab and chemotherapy, the rate of ATE was approximately 8.5%.

28  
29 Aspirin is a standard therapy for primary and secondary prophylaxis of ATE in  
30 patients at high risk of such events, and the use of aspirin  $\leq 325$  mg daily was allowed  
31 in the five randomized studies discussed above, though safety analyses specifically  
32 regarding aspirin use were not preplanned. Due to the relatively small numbers of  
33 aspirin users and ATE events, retrospective analyses of the ability of aspirin to affect  
34 the risk of ATE were inconclusive. Further analyses of the effects of concomitant use  
35 of bevacizumab and aspirin are ongoing.

36 Venous thromboembolism (VTE), including deep venous thrombosis, pulmonary  
37 embolism and thrombophlebitis. In the Phase III pivotal trial in metastatic CRC,  
38 there was a slightly higher rate of VTE in patients treated with  
39 chemotherapy + bevacizumab compared with chemotherapy alone (19% vs. 16%).  
40 The incidence of NCI-CTC Grade  $\geq 3$  VTEs in one NSCLC trial (E4599) was higher  
41 in the bevacizumab-containing arm compared to the chemotherapy control arm (5.6%  
42 vs. 3.2%).

43  
44 In clinical trials across all indications, the overall incidence of VTEs ranged from  
45 2.8% to 17.3% in the bevacizumab-containing arms compared to 3.2% to 15.6% in  
46 the chemotherapy control arms. The use of bevacizumab with chemotherapy does not  
47 substantially increase the risk of VTE compared with chemotherapy alone. However,

1 patients with mCRC who receive bevacizumab and experienced VTE may be at  
2 higher risk for recurrence of VTE.

3  
4 Gastrointestinal Perforation: GI perforations and/or fistula were rare but occurred at  
5 an increased rate in bevacizumab-containing therapies. The majority of such events  
6 required surgical intervention and some were associated with a fatal outcome. In the  
7 pivotal phase III trial in CRC (AVF2107), the incidence of bowel perforation was 2%  
8 in patients receiving IFL/bevacizumab and 4% in patients receiving 5-  
9 FU/bevacizumab compared to 0.3% in patients receiving IFL alone. GI perforation  
10 has also been reported in non-CRC tumors (e.g. gastric/esophageal, pancreatic and  
11 ovarian cancers) or nonmalignant conditions such as diverticulitis and gastric ulcer.  
12 GI perforation should be included in the differential diagnosis of patients on  
13 bevacizumab therapy presenting with abdominal pain or rectal/abdominal abscess.

14  
15 Fistula: Fistula formations, including events resulting in death, have been observed in  
16 patients receiving bevacizumab in clinical studies and post-marketing reports.  
17 Fistulae in the GI tract are common (1-10% incidence) in patients with certain  
18 metastatic tumors such as colorectal cancer or cervical, but uncommon (0.1-1%) or  
19 rare (0.01-0.1%) in other indications. In addition, fistulae that involve areas other than  
20 the GI tract have also been observed (e.g. tracheoesophageal, bronchopleural,  
21 urogenital, biliary). Events were reported at various time points during treatment,  
22 ranging from 1 week to > 1 year following initiation of bevacizumab, with most  
23 events occurring within the first 6 months of therapy.

24  
25 **Wound Healing Complications.** Bevacizumab delays wound healing in rabbits, and it  
26 may also compromise or delay wound healing in patients. Bowel anastomotic  
27 dehiscence and skin wound dehiscence have been reported in clinical trials with  
28 bevacizumab.

29  
30 The appropriate interval between surgery and initiation of bevacizumab required to  
31 avoid the risk of impaired wound healing has not been determined. Across metastatic  
32 CRC trials, at least 28 days must have elapsed following major surgery before  
33 bevacizumab could be initiated; data suggested initiation of bevacizumab 29-60 days  
34 following surgery did not appear to increase the risk of wound healing complications  
35 compared to those treated with chemotherapy alone.

36  
37 The optimal interval between termination of bevacizumab and subsequent elective  
38 surgery has not been determined. In the pivotal study in CRC, among patients who  
39 underwent major surgery while on study therapy, there was an increased rate of  
40 significant post-operative bleeding or wound healing complications in the IFL +  
41 bevacizumab arms vs. IFL alone [10% (4/40) vs. 0% (0/25)] (77). Decisions on the  
42 timing of elective surgery should take into consideration the half-life of bevacizumab  
43 (average 21 days, range 11-50 days).

44  
45 If patients receiving treatment with bevacizumab require elective major surgery, it is  
46 recommended that bevacizumab be held for 4–8 weeks prior to the surgical  
47 procedure. Patients undergoing a major surgical procedure should not begin/restart  
48 bevacizumab until 4 weeks after that procedure (in the case of high-risk procedures

1 such as liver resection, thoracotomy, or neurosurgery, it is recommended that  
2 chemotherapy be restarted no earlier than 6 weeks and bevacizumab no earlier than 8  
3 weeks after surgery).  
4

5 Congestive Heart Failure (CHF). The risk of left ventricular dysfunction may be  
6 increased in patients with prior or concurrent anthracycline treatment. In phase III  
7 trials in metastatic breast cancer (AVF 2119g) in which all patients had received prior  
8 anthracyclines, CHF or cardiomyopathy were reported in 3% in the bevacizumab +  
9 capecitabine arm compared to 1% in the capecitabine-only arm (66). In a phase III  
10 trial of patients with previously untreated metastatic breast cancer (E2100), the  
11 incidence of LVEF decrease (defined as NCICTC Grade 3 or 4) in the  
12 paclitaxel + bevacizumab arm was 0.3% versus 0% for the paclitaxel alone arm.

13 In phase II study of 48 patients with refractory acute myelogenous leukemia treated  
14 with cytarabine, mitoxantrone, and bevacizumab, 5 cases of cardiac dysfunction  
15 (CHF or decreases to <40% in left ventricular ejection fraction, including AML trial)  
16 were reported. All but one of these subjects had significant prior exposure to  
17 anthracyclines as well.

18 Two additional studies investigated concurrent administration of anthracyclines and  
19 bevacizumab. In 21 patients with inflammatory breast cancer treated with  
20 neoadjuvant docetaxel, doxorubicin (cumulative doses at 240 mg/m<sup>2</sup>), and  
21 bevacizumab, no patients developed clinically apparent CHF; however, patients had  
22 asymptomatic decreases in LVEF to < 40% (78). In a small phase II study in  
23 patients with soft tissue sarcoma, 2/17 patients treated with bevacizumab and high-  
24 dose doxorubicin (75 mg/m<sup>2</sup>) developed CHF (one Grade 3 event after a cumulative  
25 doxorubicin dose of 591 mg/m<sup>2</sup>, one Grade 4 event after a cumulative doxorubicin  
26 dose of 420 mg/m<sup>2</sup>); an additional 4 patients had asymptomatic decreases in LVEF  
27 (79).

28 Patients receiving anthracyclines or with prior exposure to anthracyclines should have  
29 a baseline MUGA or ECHO with a normal ejection fraction.

30 Reversible Posterior Leukoencephalopathy Syndrome (RPLS), Posterior Reversible  
31 Encephalopathy Syndrome (PRES), or similar leukoencephalopathy syndrome.  
32 RPLS/PRES are clinical syndromes related to vasogenic edema of the white matter  
33 and have rarely reported in association with bevacizumab therapy (<1%). Clinical  
34 presentations may include altered mental status, seizure, visual disturbance or cortical  
35 blindness, with or without associated hypertension. MRI scans are required for  
36 diagnosis. Typical findings are vasogenic edema (enhanced intensity in T2 and  
37 FLAIR sequences on non-contrast MRI) predominantly in the white matter of the  
38 posterior parietal and occipital lobes, and less frequently, in the anterior distributions  
39 and the gray matter.  
40

41 RPLS/PRES is potentially reversible, but timely correction of the underlying causes,  
42 including control of BP and interruption of the offending drug, is important in order  
43 to prevent irreversible tissue damage. The safety of reinitiating bevacizumab therapy  
44 in patients previously experiencing RPLS is not known (80, 81).



1 Neutropenia. In the phase III trial with IFL +/- bevacizumab in colorectal cancer,  
2 grade 3-4 neutropenia was 21% with bevacizumab + IFL vs. 14% with IFL (grade 4  
3 neutropenia was 3% vs. 2%). Increased rates of severe neutropenia, febrile  
4 neutropenia, or infection with severe neutropenia (including some fatalities) have  
5 been observed in patients treated with some myelotoxic chemotherapy regimens plus  
6 bevacizumab. In a phase III in NSCLC, carboplatin and paclitaxel + bevacizumab  
7 arm was associated with increased rate of grade 4 neutropenia (27% vs. 17%), febrile  
8 neutropenia (5.4% vs. 1.8%), and infection with neutropenia (4.4% vs. 2.0%) with  
9 three fatal cases (82).

10 Additional Adverse Events. See the bevacizumab Investigator's Brochure for  
11 additional details regarding the safety experience with bevacizumab.

12 Fertility and Pregnancy. Clinical data are lacking regarding the immediate or long-  
13 term effect of bevacizumab on fertility and pregnancy. However, bevacizumab is  
14 known to be teratogenic and detrimental to fetal development in animal models. In  
15 addition, bevacizumab may alter corpus luteum development and endometrial  
16 proliferation, thereby having a negative effect on fertility. As an IgG1, it may also be  
17 secreted in human milk. Therefore, fertile men and women on bevacizumab studies  
18 must use adequate contraceptive measures and women should avoid breast feeding.  
19 The duration of such precautions after discontinuation of bevacizumab should take  
20 into consideration the half-life of the agent (average 21 days, ranging from 11 to 50  
21 days).

22 Immunogenicity. As a therapeutic protein, there is a potential for immunogenicity  
23 with bevacizumab. With the currently available assay with limited sensitivity, high  
24 titer human anti-bevacizumab antibodies have not been detected in approximately 500  
25 patients treated with bevacizumab.

## 26 2.9 Rationale

27 Although the NF2-related vestibular schwannomas are histologically benign, they  
28 demonstrate inexorable growth ultimately leading to bilateral hearing loss in  
29 adulthood. In addition, these tumors are in close proximity to the brain stem and are  
30 associated with multiple cranial neuropathies resulting in loss of facial muscle  
31 function, difficulty chewing or swallowing, visual impairment, and in some cases  
32 death due to brainstem compression. There is no effective medical treatment for NF2-  
33 related tumors. Given the limitations of surgery or radiation and the devastating  
34 impact of these tumors, innovative treatments are desperately needed.

35 Tumor angiogenesis is an important therapeutic target in patients with other brain  
36 tumors like glioblastoma, as well as other tumor types including lung, breast, and  
37 colon cancer. Vascular endothelial growth factor (VEGF) is a pleiotropic growth  
38 factor that mediates multiple functions through binding to VEGF receptors 1 and 2.  
39 An extensive literature supports a central role for VEGF in endothelial cell  
40 proliferation, survival, and migration (83). VEGF expression is up-regulated in many  
41 tumor types by environmental factors (e.g., hypoxia and low pH), genetic mutations  
42 (e.g., p53, EGFR) and indirectly by other growth factors (e.g., IL-1, and PDGF).  
43  
44  
45  
46

1 We have recently completed a study of 43 archival specimens of VSs. We found that  
2 VEGF was expressed in 100% of the cases examined and bound to the endothelium in  
3 71% of NF2 VSs (84, 85). VEGFR2, the receptor commonly associated with active  
4 tumor angiogenesis, was found in only 31% of vessels which is significantly lower  
5 than in normal nerve (> 80% of the vessels) or in malignant brain tumors such as  
6 glioblastomas where all vessels express VEGFR2.

7  
8 To gain further insight into the vascular abnormalities of schwannomas, we measured  
9 the density of vessels (MVD), their average size and perivascular cell coverage. Both  
10 MVD and size were increased in schwannomas while SMA-positive perivascular  
11 cells were reduced below 30%. These data conclusively demonstrate that  
12 schwannomas display an overall picture of active angiogenesis with more and larger  
13 vessels with abnormal cellular and molecular phenotype. Furthermore, they suggest  
14 that, for NF2-related tumors, neutralizing VEGF (using anti-VEGF antibodies) might  
15 be more effective than neutralizing VEGF receptors (using small molecule inhibitors  
16 of receptor tyrosine kinase).

17  
18 It is widely accepted that the main effect of VEGF, secreted by tumor cells, is to  
19 stimulate angiogenesis through paracrine mechanisms. Agents that neutralize the  
20 VEGF pathway not only prevent growth of new vessels but also temporary  
21 “normalize” the abnormal, disorganized tumor vasculature into functional blood  
22 vessels thereby reducing peritumoral edema (86) . In an imaging study of 14 patients  
23 with recurrent glioblastoma (87), 7 patients experienced at least a 50% reduction in  
24 the size of the contrast-enhancing lesion with or without reduction in edema and an  
25 additional 3 patients with stable disease experienced a decrease in edema. A similar  
26 study was performed by our group in patients with recurrent glioblastoma who were  
27 treated with AZD2171, an oral pan-VEGF receptor inhibitor (34). In this study, 12 of  
28 16 (75%) patients experienced > 25% in the size of the contrast-enhancing lesion.  
29 Furthermore, there was a significant reduction in the amount of cerebral edema  
30 associated with the tumors as determined by decrease in the ADC and FLAIR signal  
31 on MRI scans. Both the anti-tumor and anti-edema features of VEGF inhibition are  
32 likely to be of extreme importance for patients with vestibular schwannomas.  
33 Furthermore, in a series of 10 patients with bilateral VS at risk of complete hearing  
34 loss treated with bevacizumab at 5mg/kg every 2 weeks we found that the mean  
35 apparent diffusion coefficient (ADC), a measure of water motility within tissue and a  
36 radiographic marker of edema (13), decreased during treatment. A strong correlation  
37 was observed between ADC level at base line and percent change in tumor volume  
38 indicating that ADC level at base line might be a potential marker for response to  
39 anti-VEGF therapy (88).

40  
41 Thus, there is a rationale for the study of anti-VEGF therapies in patients with  
42 primary brain tumors (including vestibular schwannomas and meningiomas). Given  
43 the importance of the VEGF pathway in vestibular schwannoma and meningioma and  
44 the putative role of edema in hearing loss, this is an especially attractive therapeutic  
45 target in NF2 patients.

46  
47 We are thus proposing a phase II clinical trial for children  $\geq 12$  years of age and  
48 adults with NF2 to define the activity of bevacizumab in this population. Patients will

1 be carefully monitored for toxicity of bevacizumab and for response. Detailed  
2 monitoring for bony toxicity in children ages 12 through 17 years will be performed  
3 (Sections 2.10 and 10).  
4

## 5 2.10 Correlative Studies Background

6 Preclinical studies have shown that blocking VEGF signaling pathways can inhibit  
7 the growth of tumors. For example, using DC101, a monoclonal antibody against  
8 VEGFR2, there is inhibition of glioma angiogenesis and growth (89). Additionally,  
9 targeting the VEGF pathway not only holds the promise to destroy tumor vessels, but  
10 can also potentially improve the function of tumor vessels. We, and others, have  
11 shown that anti-VEGF therapy using a tyrosine kinase inhibitor of the receptors  
12 VEGFR1, -R2, -R3 and PDGFR $\alpha$  and - $\beta$  in recurrent gliomas induced sustained  
13 decrease in  $k^{\text{trans}}$  and ADC measured by functional MRI. All patients had significantly  
14 less edema and were able to decrease or completely stop their use of corticosteroids.  
15

16 This study is designed to not only assess the benefit of anti-angiogenic therapy in  
17 NF2-related VSs, but also to understand the mechanism by which these changes  
18 occur. This goal requires novel clinical trial designs, monitoring volumetric  
19 radiographic response (29), functional parameters of vessels function (34),  
20 functional hearing (24) as well as known biomarkers of response and progression to  
21 anti-VEGF therapy (34, 35). These measures will help define the optimal duration of  
22 therapy for efficacy and possibly allow prediction of which patients are most likely to  
23 have a clinically beneficial response to VEGF blockade. Furthermore, since these  
24 patients harbor benign rather than malignant tumors, it is important to monitor closely  
25 systemic exposure to potentially toxic agents over a long period of time. This study is  
26 designed to establish the biological effect of bevacizumab in NF2-related VSs.  
27

### 28 Hearing loss and NF 2

29 Patients with NF2 are at high risk for complete hearing loss. Although hearing loss is  
30 related to the presence of VSs, the degree of hearing sensitivity (threshold) is only  
31 loosely correlated with tumor size. This dissociation may be due to direct  
32 compression of the auditory nerve, presence of intratumoral edema, disruption of  
33 blood flow to the cochlea, degeneration of certain cochlear structures, and distortion  
34 of auditory centers in the brainstem. There is evidence that the cochlea and the 8<sup>th</sup>  
35 cranial nerve are sites of both cell degeneration and the accumulation of precipitate in  
36 cases of VS (22). This means that sites anywhere along the auditory pathways—from  
37 the periphery to the brainstem—may contribute to the observed loss of hearing  
38 function. Thus, we will use the full range of audiologic diagnostic tools available to  
39 assess function of the pathway. Hearing will be monitored by measuring pure tone  
40 thresholds, word recognition scores, and otoacoustic emissions (OAEs) (please see  
41 section 2.3). This will allow an estimate of where bevacizumab appears to be most  
42 active in restoring hearing. In addition (at the NCI only), the effect of bevacizumab  
43 on vestibular function will be evaluated (Appendix K).  
44

### 45 Functional MRI Imaging

46 The development of anti-angiogenic therapies for tumors has led to a demand for  
47 imaging-based assessment of vascular related changes in vivo. Several techniques  
48 have been developed for this purpose, and the hardware and software required for

1 these analyses is now widely available at academic centers. T2\*-weighted MRI  
2 studies are highly reproducible across sites when similar acquisition protocols are  
3 used and have been used as a surrogate measures of biologic effect in vivo in clinical  
4 trials (30). In addition to measuring the size of tumors with post-contrast images,  
5 dynamic contrast enhanced (DCE)-MRI can be used to measure the permeability of  
6 tumor vessels. This technique has been used to measure changes in the AUC in  
7 patients with a variety of brain tumors including VSs, meningiomas, and gliomas  
8 (31). We have the required experience with these techniques to produce reproducible  
9 images that will allow the assessment of the effect of bevacizumab on the tumoral and  
10 peritumoral vasculature of VSs.

## 11 Plasma Biomarkers

13 Our study and others suggest that there are dose- and time-dependent increases in  
14 soluble VEGF and PlGF and decreases in soluble VEGFR following treatment with  
15 anti-angiogenic agents (34, 35, 37, 38). Our studies have also shown that circulating  
16 biomarkers can help predict tumor progression. For example, progression of  
17 glioblastoma during treatment with AZD2171 is associated with significant increases  
18 in basic fibroblast growth factor (b-FGF) and stromal cell-derived factor 1 alpha  
19 (SDF-1 $\alpha$ ), whereas progression in hepatocellular carcinoma after sunitinib is  
20 correlated with increases in IL-6 and SDF-1 $\alpha$ . Finally, we found that baseline  
21 sVEGFR1 concentration in plasma may predict response to bevacizumab therapy in  
22 rectal cancer patients {Duda et al., The Oncologist 2010}.

24 Tumor-derived angiogenic factors mobilize progenitor cells from the bone marrow  
25 and increase the survival/proliferation of populations of cells already present in the  
26 peripheral blood (e.g. circulating endothelial cells (CECs), circulating progenitor cells  
27 (CPCs) or VEGFR2+ monocytes (90). These effects are mediated through specific  
28 receptors present on these cells, such as VEGFR2 or -R1 (91), and the enumeration  
29 of CECs and CPCs in the peripheral blood has been proposed as an angiogenic  
30 marker (92). The number of CECs and CPCs, measured by flow cytometry, decreases  
31 significantly after bevacizumab therapy in rectal cancer patients, and high CEC levels  
32 post-treatment correlate with residual disease (93). In hepatocellular carcinoma  
33 patients, anti-VEGF treatment with sunitinib decreases the CPCs, and an increase in  
34 CPCs at any time point correlates with poor survival (37). Finally, in recurrent  
35 glioblastoma patients, an increase in CECs during AZD2171 treatment was seen in  
36 patients with rapid disease progression (38).

38 There is no data on cellular and molecular biomarkers for anti-VEGF agents in  
39 patients with NF2 and this study proposes to analyze baseline biomarkers with respect  
40 to tumor burden (volume) and outcomes (response) as well as the possible effect of  
41 bevacizumab on biomarker levels over time.

## 43 Whole Body MRI Assessment

44 There have been recent technological developments that allow rapid imaging of the  
45 whole body. 3D segmentation and computerized volumetry have been used to  
46 calculate the whole body tumor burden in a single imaging session in patients with  
47 NF1, NF2 and schwannomatosis (41). This study showed that the combination of

1 whole body MRI with tumor volumetry is feasible and reliably assesses total body  
2 tumor burden. Our anecdotal experience is that NF2 patients with progressive VS  
3 have significant benefit with bevacizumab, but it is not clear if associated peripheral  
4 tumors in NF2 have any response to bevacizumab. We will use the technique  
5 established by Cai et al. using a 1.5T MR imager and an integrated body coil to assess  
6 the whole body tumor burden in patients enrolled on the trial at baseline. The images  
7 can be acquired at all three centers (JHU, MGH, NIH) and the image processing will  
8 be performed at the JHU. In patients with at least one peripheral tumor >2cm in linear  
9 measure at baseline, we will repeat the MRI at 25 and 49 weeks.

10  
11 Whole body MRI is increasingly applied to evaluate patients with widely involved  
12 systemic disease more efficiently than individual segmental imaging techniques (94-  
13 96). This data will provide preliminary information about the feasibility of applying  
14 whole body MRI prospectively in the setting of a phase II trial for neurofibromatosis  
15 and the effect of bevacizumab on peripheral tumors in patients NF2 that can assist in  
16 the design of future trials assessing peripheral tumors in this population.

#### 17 18 Quality of Hearing and Quality of Life Assessments

19 As discussed, there is evidence that late hearing loss can result in increased perceived  
20 disability, decreased social interactions, and increased rates of depression (51, 52).  
21 Quality of hearing and the relationship to QOL has not yet been prospectively  
22 assessed in NF2 patients. In the setting of this prospective therapeutic trial, we will  
23 use a global measure of QOL (SF-36) as well as measures that are designed to assess  
24 specific hearing function in daily activities (TRQ and SSQ) to explore these measures  
25 in patients with progressive VS at baseline and after therapy. Finally, we will include  
26 three questions about the patients' experience of being involved in this clinical trial to  
27 explore how involvement in an experimental therapeutic trial may be influencing  
28 perceived QOL. These surveys will be given to patients at baseline, 25, 49 weeks and  
29 at the off-study visit.

#### 30 31 Evaluations for Bony Toxicity in Children

32 One of the systems affected by angiogenesis inhibitors is the epiphyseal growth plate.  
33 Inhibition of VEGF signaling affects bone growth by thickening the epiphyseal  
34 growth plate due to expansion of the hypertrophic zone. These effects have been  
35 attributed to delayed vascular invasion of the epiphyseal growth plate resulting in a  
36 reduced rate of hypertrophic chondrocyte apoptosis (97). The changes in growth plate  
37 thickness can be morphometrically quantified revealing a dose dependent increase in  
38 the epiphyseal area of up to 481% (98). Inhibition of VEGF also seems to impair  
39 trabecular bone formation. Mice treated with a soluble VEGF receptor chimeric  
40 protein, mFlt (1-3)-IgG showed a reduced length and number of primary trabeculae.  
41 Restoration of normal angiogenesis by discontinuation of mFlt (1-3)-IgG resulted in  
42 rapid reversal of all growth plate changes within two weeks (99). Partially reversible  
43 physeal dysplasia was observed in growing non-human primates after treatment with  
44 bevacizumab for four weeks (98).

45  
46 In the preclinical studies with angiogenesis inhibitors including sorafenib and  
47 bevacizumab, effects on bone structure such as thickening of the growth plates were  
48 seen in only developing animals, including rats and dogs. Increased bone formation

beneath the growth plate and bone malformation or epiphysiolysis was also observed at high doses in rats. These changes in the bone seemed to be reversible after 4 weeks of recovery (100). Since there is a possibility of the bone toxicity from angiogenesis inhibition from the use of bevacizumab in children, we have incorporated careful assessments of skeletal measures as safety and outcome parameters for this protocol. We plan to use the following measures to carefully assess bony changes or toxicity (timing and methods detailed in study implementation):

- Multiple measures of height and growth
- Lower extremity scanogram for femur length measurement and growth plate

| Patient | Age | Observer 1                |        | Observer 2                |        | % mean difference between observers |
|---------|-----|---------------------------|--------|---------------------------|--------|-------------------------------------|
|         |     | volume (mm <sup>3</sup> ) | CV (%) | volume (mm <sup>3</sup> ) | CV (%) |                                     |
| 1       | 13  | 2493                      | 0.7%   | 2510                      | 2.0%   | -0.71%                              |
| 2       | 7   | 3103                      | 3.0%   | 2894                      | 2.7%   | 6.74%                               |
| 3       | 8   | 4477                      | 3.3%   | 4167                      | 2.1%   | 6.91%                               |
| 4       | 5   | 3779                      | 6.1%   | 3622                      | 4.2%   | 4.15%                               |

assessment

- Dual-energy X-ray absorptionmetry (DEXA) of lumbar spine and total body for evaluation of bone mineral density (BMD) and composition
- Serum calcium, phosphorus, bone specific alkaline phosphatase, osteocalcin, PTH, and vitamin D levels (1, 25-dihydroxy vitamin D and 25-hydroxy vitamin D) for evaluation of bone turnover and metabolism
- Knee MRI for patients with open growth plates for evaluation and measurement of the tibial and femoral growth plates

Identical monitoring is performed on a CTEP sponsored phase I trial of sorafenib (which also inhibits angiogenesis) for children with neurofibromatosis type 1 and inoperable plexiform neurofibromas.

#### Growth plate analysis

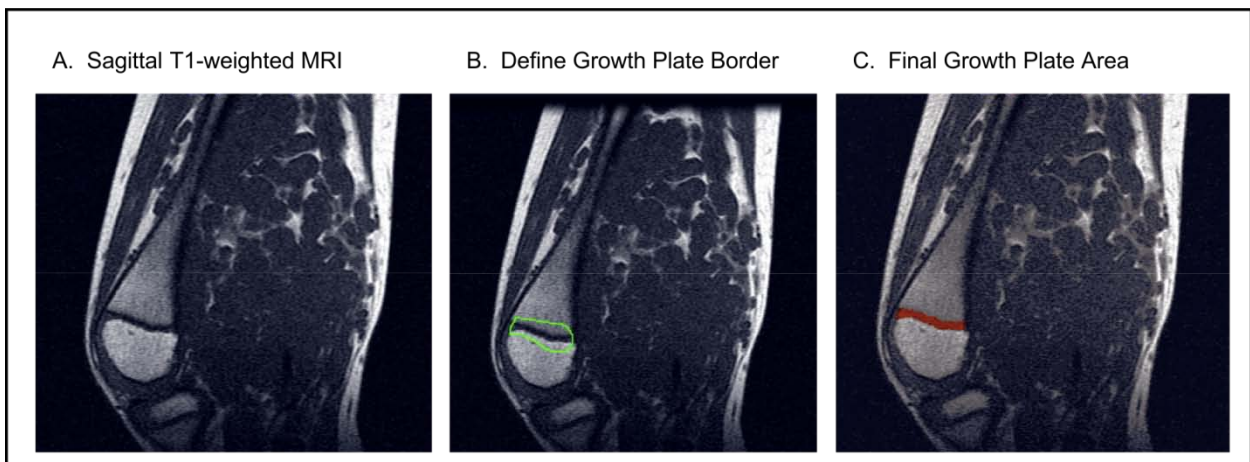

A method of automated volumetric MRI analysis of growth plate volume has been developed by Jeffrey Solomon, and will be used to centrally monitor growth plate toxicity at the NCI. Standardized sagittal T1 images will be obtained, without the use

1 of IV contrast, as described in Appendix IV to image the growth plates of the right  
2 knee. Growth volume will be determined using the MEDx software platform. The  
3 method is based on the pixel intensities within the region of interest and performs a  
4 Bayesian probabilistic analysis to classify pixels into three different tissue classes.  
5

6 The steps of volumetric analysis are outlined in the figure below. A) Sagittal T1-  
7 Weighted MRI of the knee. The growth plates appear dark in contrast to adjacent  
8 bony structures. B) Region of interest including the low signal intensity growth plate  
9 and some higher signal intensity adjacent bone is manually outlined on each MRI  
10 slice. C) The program automatically displays the class of interest (i.e. the growth  
11 plate) red on each slice and calculates the volume of all the red pixels.  
12  
13

14 This method is currently undergoing validation at the Pediatric Oncology Branch,  
15 including the determination of inter- and intra-observer comparisons, and of the  
16 coefficient of variation. Preliminary results from the application of the automated  
17 method of volumetric MRI analysis of growth plates are shown in the table below.  
18 The table describes average growth plate volumes and coefficient of variation (CV)  
19 for three different determinations on three different days by two observers. The  
20 percent mean difference between observers is calculated by  $[(\text{observer 1} - \text{observer 2}) / \text{observer 1}] \times 100$ . Thus far, this method appears to have good inter and intra-  
21 observer reproducibility. We will plan on further evaluating with more patients as  
22 well as subsequent knee MRI on the same patient at later dates.  
23  
24

1  
2  
3 3. PATIENT SELECTION  
4

5 3.1 Eligibility Criteria  
6

7 1.1.1 Patients must have a confirmed diagnosis of neurofibromatosis 2 by fulfilling  
8 National Institute of Health (NIH) criteria or Manchester criteria, or by  
9 detection of a causative mutation in the NF 2 gene.  
10

11 The NIH criteria (82) includes presence of:

- 12 • Bilateral vestibular schwannomas, OR
- 13 • First-degree relative with NF2 and EITHER unilateral eighth nerve  
14 mass OR two of the following: neurofibroma, meningioma,  
15 glioma, schwannoma, juvenile posterior subcapsular lenticular  
16 opacity  
17

18 The Manchester criteria (101) includes presence of:

- 19 • Bilateral vestibular schwannomas, OR
- 20 • First-degree relative with NF2 and EITHER unilateral eighth nerve  
21 mass OR two of the following: neurofibroma, meningioma,  
22 glioma, schwannoma, juvenile posterior subcapsular lenticular  
23 opacity, OR
- 24 • Unilateral vestibular schwannoma AND any two of: neurofibroma,  
25 meningioma, glioma, schwannoma, juvenile posterior subcapsular  
26 lenticular opacity, OR
- 27 • Multiple meningiomas (two or more) AND unilateral vestibular  
28 schwannoma OR any two of: schwannoma, glioma, neurofibroma,  
29 cataract  
30

31 3.1.2 Patients must have measurable disease, defined as at least one VS  $\geq 1.5$  cm (on  
32 longest diameter) as measured by contrast-enhanced cranial MRI scan with  
33 fine cuts through the internal auditory canal (3 mm slices, no skip).  
34

35 3.1.3 Age  $\geq 12$  years.  
36

37 3.1.4 Life expectancy of greater than 6 months.  
38

39 3.1.5 ECOG performance status (Karnofsky  $\geq 60\%$  or Lansky Score  $\geq 60$ ; see  
40 Appendix A).  
41

42 3.1.6 Patients must have normal organ and marrow function as defined below:  
43

- 44 • leukocytes  $\geq 3,000/\text{mcL}$
- 45 • absolute neutrophil count  $\geq 1,500/\text{mcL}$
- 46 • platelets  $\geq 150,000/\text{mcL}$  or lower limit of  
47 institutional normal
- 48 • total bilirubin  $\leq 2 \times$  institutional upper limit of normal



- AST(SGOT)/ALT(SGPT)  $\leq 2.5$  X institutional upper limit of normal

3.1.7 Patients must have recovered from acute toxicity of prior treatment to grade 1 or less unless otherwise specified.

3.1.8 Patients must have a creatinine clearance or radioisotope GFR  $\geq 60$  ml/min/1.73 m<sup>2</sup> or a normal serum creatinine based on age described in the table below.

| Age (years)               | Maximum Serum Creatinine (mg/dL) |
|---------------------------|----------------------------------|
| $\leq 5$                  | 0.8                              |
| $5 < \text{age} \leq 10$  | 1.0                              |
| $10 < \text{age} \leq 15$ | 1.2                              |
| $> 15$                    | 1.5                              |

3.1.9 Subjects a VS not to surgery refused due to high permanent complications related to surgery (e.g. damage to lower cranial nerve function, facial palsy, risk for cerebrospinal fluid leak, etc.) as determined by a surgeon with experience in management of NF2 associated VS. must have amenable or have surgery risk for

3.1.10 Subjects must have had a discussion of all available treatment options and their risks and benefits of these options including surgery, radiation therapy, observation, other clinical trials and expressed their preference for participation in this trial in the informed consent process.

3.1.11 The effects of bevacizumab on the developing human fetus at the recommended therapeutic dose are unknown. For this reason and because anti-angiogenic agents are known to be teratogenic, women of child-bearing potential and men must agree to use adequate contraception (hormonal or barrier method of birth control; abstinence) prior to study entry and for the duration of study participation. Should a woman become pregnant or suspect she is pregnant while participating in this study, she should inform her treating physician immediately.

3.1.12 Ability to understand and the willingness give written informed consent or assent.

3.1.13 Evidence of active disease, defined as progressive hearing loss (with decrease in word recognition score) related to VS (i.e., not due to prior interventions such as surgery or radiation) documented in the preceding 24 months with a word recognition score of  $< 90\%$  in the target ear.

1 3.1.14 Proteinuria (including albuminuria) should be screened for by either urine  
2 analysis for urine protein creatinine (UPC) ratio or by urine dipstick. If the  
3 UPC ratio is greater than or equal to 0.5 or if urine dipstick shows 2+  
4 proteinuria, 24-hour urine protein should be obtained and the level should be  
5 <1000 mg for patient enrollment.  
6

7 3.2 Exclusion Criteria  
8

9 3.2.1 Patients who have had chemotherapy or radiotherapy within 4 weeks (6 weeks  
10 for nitrosoureas or mitomycin C) prior to entering the study or those who have  
11 not recovered from adverse events due to agents administered more than 4  
12 weeks earlier.  
13

14 3.2.2 Patients may not be receiving any other investigational agents.  
15

16 3.2.3 Patients with nervous system tumors associated with NF2 (e.g., schwannomas,  
17 meningiomas, ependymomas, or gliomas) will not be excluded from this  
18 clinical trial as long as these tumors do not require treatment with radiation,  
19 surgery, or medical treatment at the time of enrollment on trial.  
20

21 3.2.4 Patients with known hypersensitivity of Chinese hamster ovary cell products,  
22 other recombinant human antibodies, or compounds of similar chemical or  
23 biologic composition to bevacizumab.  
24

25 3.2.5 Inability to tolerate periodic MRI scans or gadolinium contrast without  
26 general anesthesia.  
27

28 3.2.6 Uncontrolled intercurrent illness including, but not limited to, ongoing or  
29 active infection, or psychiatric illness/social situations that would limit  
30 compliance with study requirements.  
31

32 3.2.7 Clinically significant cardiovascular disease, such as

- 33 1 Inadequately controlled HTN (adult subjects: SBP > 160 mmHg  
34 and/or DBP > 90 mmHg despite antihypertensive medication,  
35 pediatric subjects: Requirement for antihypertensive treatment  
36 prior to enrollment, or diastolic blood pressure >95<sup>th</sup> percentile for  
37 age –Appendix F))History of CVA within 12 months
- 38 2 Myocardial infarction or unstable angina within 12 months
- 39 3 New York heart association grade II or greater congestive heart  
40 failure
- 41 4 Serious and inadequately controlled cardiac arrhythmia
- 42 5 Significant vascular disease (e.g. aortic aneurysm, history of aortic  
43 dissection)
- 44 6 Clinically significant peripheral vascular disease  
45

46 3.2.8 Pregnant women (positive pregnancy test) are excluded from this study  
47 because bevacizumab is an anti-angiogenic agent with the potential for  
48 teratogenic or abortifacient effects. Because there is an unknown but potential

1 risk for adverse events in nursing infants secondary to treatment of the mother  
2 with bevacizumab, breastfeeding should be discontinued if the mother is  
3 treated with bevacizumab. Both fertile men and women must agree to use  
4 adequate contraceptive measures during study therapy and for at least 6  
5 months after the completion of bevacizumab therapy. Abstinence is  
6 considered an adequate contraceptive measure.  
7

8 In the event that a minor (age 12-17) who undergoes a pregnancy test as part  
9 of the screening process receives a positive result, they will be excluded from  
10 the study and their parent(s) of record will be notified of this result.  
11

12 3.2.9 HIV-positive patients or cancer survivors are eligible for this study if they  
13 fulfill all other eligibility criteria.  
14

15 3.2.10 Inability to perform volumetric measurement of target VS (e.g., due to the  
16 MRI artifact from auditory brainstem implant or due to presence of collision  
17 tumor (two or more tumors abutting each other) in the cerebellopontine  
18 angle). **Note:** questions about the ability to perform volumetric analysis on a  
19 baseline MRI scan should be directed to the study radiologist, Dr. Gregory  
20 Sorensen.  
21

22 3.2.11 Concurrent use of anti-coagulant drugs (not including prophylactic doses),  
23 history of coagulopathy, or evidence of bleeding diathesis or coagulopathy.  
24

25 3.2.12 Imaging (CT or MRI) evidence of newly identified hemorrhage (new within  
26 the last in the 6 months prior to enrollment), any history of symptomatic  
27 intracranial hemorrhage, or any history of spontaneous intracranial  
28 hemorrhage.  
29

30 3.2.13 Serious or non-healing wound, ulcer or bone fracture.  
31

32 3.2.14 History of abdominal fistula, gastrointestinal perforation or intra-abdominal  
33 abscess within 6 months prior to day 1.  
34

35 3.2.15 Invasive procedures defined as follows:

- 36 \* Major surgical procedure, open biopsy or significant traumatic injury within  
37 28 days prior to Day 1 therapy
- 38 \* Brain biopsy within 28 days prior to day 1 of therapy (wounds must be fully  
39 healed from brain biopsies performed more than 28 days prior to day 1 of  
40 therapy)
- 41 \* Anticipation of need for major surgical procedures during the course of the  
42 study
- 43 \* Core biopsy within 7 days prior to D1 therapy  
44

45 3.2.16 Prior treatment with bevacizumab or other VEGF targeting therapies.  
46

47 3.2.17 Personal history of autoimmune coagulopathy, including idiopathic  
48 thrombocytopenia purpura (ITP).

1  
2 **1.3 Inclusion of Women and Minorities**

3 Both men and women, and members of all races and ethnic groups are eligible for this  
4 trial.  
5

6  
7 **4. REGISTRATION PROCEDURES**

8  
9 **4.1 General Guidelines**

10 Eligible patients will be registered on study centrally at the Johns Hopkins  
11 Comprehensive Neurofibromatosis Center by the Study Coordinator, Amanda  
12 Bergner. All sites should call Ms. Bergner at 410-955-2509 to verify agent  
13 availability.  
14

15 Following registration, patients should begin protocol treatment within 28 days.  
16 Appropriate clinical evaluation will be done (including MRI, audiometry or other  
17 indicated studies) for any reported change in clinical status in the interval between  
18 registration and treatment. Any new or changing medical issues that would cause  
19 treatment delays should be discussed with the Principal Investigator. If a patient does  
20 not receive protocol therapy following registration, the patient's registration on the  
21 study may be canceled. Ms. Bergner should be notified of cancellations as soon as  
22 possible.  
23

24 Except in very unusual circumstances, each participating institution will order  
25 DCTD-supplied agents directly from CTEP. Agents may be ordered by a participating  
26 site only after the initial IRB approval for the site has been forwarded by the  
27 Coordinating Center to the CTEP PIO ([PIO@ctep.nci.nih.gov](mailto:PIO@ctep.nci.nih.gov)).  
28

29 **4.2 Registration Process**

30 To register a patient, the following documents should be completed by the research  
31 nurse or data manager and submitted to the Amanda Bergner by fax at 410-614-0845  
32 or email at [abergne1@jhmi.edu](mailto:abergne1@jhmi.edu):

- 33 • Signed patient consent form
  - 34 • HIPAA authorization form (not applicable to patients enrolled at the NCI,  
35 which is not a covered entity)
  - 36 • Completed Patient Eligibility Checklist (Appendix M)
- 37

38 The research nurse or data manager at the participating site will then contact Amanda  
39 Bergner, the Central Study Coordinator by phone at 410-502-6732 or email at  
40 [abergne1@jhmi.edu](mailto:abergne1@jhmi.edu) to verify eligibility. To complete the registration process, the  
41 Coordinator will:

- 42 • Assign a patient study number
  - 43 • Register the patient on the study
  - 44 • E-mail the patient study number to the participating site and require  
45 confirmation of receipt of this email
- 46

47 **5. TREATMENT PLAN**  
48

1           5.1    Bevacizumab Administration

2           Treatment can be administered on an outpatient basis. Reported adverse events and  
3           potential risks are described in Sections 6 and 7. Appropriate responses to adverse  
4           events are described in Section 6. No investigational or commercial agents or  
5           therapies other than those described below may be administered with the intent to  
6           treat the patient's tumors.

7  
8           Bevacizumab is administered by IV infusion at a dose of 7.5 mg/kg every 3 weeks  
9           (see Schema page 3). One cycle lasts 6 weeks and includes two infusions of  
10          bevacizumab. The dose should be based on the patient's actual body weight. If the  
11          institutional standard is to perform weight-based dose calculations on the day of the  
12          infusion, this will be the plan for administration. Otherwise, the dose will be  
13          recalculated only if there is a weight change of >10% from baseline. The planned  
14          treatment duration will be 48 weeks.

15  
16          Patients will stop bevacizumab treatment at the completion of 48 weeks, but will  
17          remain on trial for two additional observations time points (3 and 6 months off of  
18          bevacizumab). The consequence of treatment interruption/discontinuation in subjects  
19          who respond to treatment is not known. For example, discontinuation of VEGF  
20          receptor inhibitors has been associated with rebound edema in some patients with  
21          recurrent glioblastoma (19). However, there is speculation that this is related to  
22          persistent, and possibly increased, tumor proliferation despite blood brain barrier  
23          normalization (REF). In contrast, VS are non-malignant tumors and it is unknown if  
24          VEGF inhibition can result in long term tumor control. Our limited experience to  
25          date in patients with NF2 treated with bevacizumab that had to stop therapy (3  
26          patients) is that there is not rapid progression of symptoms. Given that patients with  
27          NF2 will often require surgery for other tumor types (i.e. ependymoma, spinal  
28          schwannoma) which will necessitate stopping bevacizumab for a minimum of 2-3  
29          months peri-operatively, and given the unknown consequences of long-term (i.e.  
30          many years) VEGF blockade, it is optimal to determine the minimal amount of  
31          VEGF inhibition required to result in clinical improvement in patients with NF2. In  
32          addition, the retrospective data that this protocol is seeking to confirm the median  
33          treatment duration was 12 months. Hence, the treatment interval for this trial is 12  
34          months (48 weeks).

35  
36          Patients will be observed for 6 months after stopping bevacizumab. If patients  
37          exhibit a decline in hearing to <85% word recognition or lower in the 6 months after  
38          stopping bevacizumab, they can be considered for application to CTEP for a  
39          compassionate use protocol. In general, this mechanism may allow use of  
40          bevacizumab via approval for compassionate use once it has been demonstrated that a  
41          patient needs immediate treatment, that no effective alternative treatment exists, and  
42          that there is data showing benefit of the agent for the tumor type. The application for  
43          special consideration for single patient treatment can be considered in select patients  
44          who had demonstrated benefit on bevacizumab and subsequent decline in the 6  
45          months of observation after bevacizumab is stopped. This will be considered on a  
46          case by case basis at the discretion of the treating physician, the study PI and the  
47          patient (and parent/guardian).

1 After 18 months (12 months on treatment and 6 months off treatment), all patients  
2 will be off study. All treatment decisions at that time will be at the discretion of the  
3 treating physician and patient (and parent/guardian).  
4

5 The first dose of bevacizumab should be given over 90 minutes. If well tolerated, the  
6 second dose can be given over 60 minutes. If this dose is well tolerated, then all  
7 subsequent infusions can be administered over 30 minutes. If an infusion reaction  
8 occurs, subsequent doses of bevacizumab should be administered over the shortest  
9 period that was well tolerated.  
10

11 To insure complete delivery of bevacizumab, flush the IV infusion line with 0.9%  
12 sodium chloride. The following are two recommended methods for flushing the  
13 bevacizumab IV infusion line:  
14

15 1. When the bevacizumab infusion is complete, add an additional 50mL of 0.9%  
16 sodium chloride for injection to the bevacizumab infusion bag. Continue the infusion  
17 until a volume equal to that of the volume contained in the tubing has been  
18 administered.  
19

20 2. Replace the empty bevacizumab infusion bag with a 50mL bag of 0.9% sodium  
21 chloride for injection and infuse a volume equal to the volume contained in the  
22 tubing. Note: the flush is not included in the total recommended infusion times.  
23

#### 24 Special Precautions/Safety Issues

25 Prior to each treatment, the patient should be carefully assessed with special attention  
26 to blood pressure, proteinuria, bleeding and cardiovascular events, as well as  
27 symptoms or signs of bowel perforation and RPLS. Decisions for retreatment or dose  
28 modification/interruption should follow the dose modification guidelines in section 6.  
29

30 Patients who have an ongoing study agent-related serious adverse event upon study  
31 completion or at discontinuation from the study will be contacted by the investigator  
32 or his/her designee periodically until the event is resolved or determined to be  
33 irreversible.  
34

35 Special attention will be paid to patients 12-17 years for the following measures:

- 36 1 Confirmed >6% bone mineral density decrease relative to baseline and  
37 who have a BMD Z score <-2.5
- 38 2 Femoral growth plate expansion 2 times the volume from baseline  
39 measurements
- 40 3 Diastolic blood pressure greater than 25 mmHg above the 95<sup>th</sup>% for age  
41 and gender (Appendix F) confirmed by repeated measurements is dose  
42 limiting and will result in discontinuation of bevacizumab  
43

44 It is anticipated that roughly 5 of the 14 patients enrolled on protocol will be <18  
45 years old. If greater than 33% of the total number of enrolled patients aged 12-17  
46 develop grade 3 or 4 toxicities of any type at any point that requiring them to stop  
47 bevacizumab, including the bone toxicity reported above, hypertension, bleeding,

1 thrombosis and all other potential toxicities, enrollment will be held for all additional  
2 patients <18 years old. Patients <18 years old already enrolled without grade 3 or 4  
3 toxicity will remain on study.  
4

5 Infusional reactions. Routine premedication is not required for the first dose of  
6 bevacizumab. If infusional reactions occur, acetaminophen, diphenhydramine,  
7 steroids or other medications may be given for symptom control and for  
8 premedication as needed. Anaphylactic precautions should be observed during  
9 bevacizumab administration.  
10

11 Hypertension. Patients should have BP monitored prior to each infusion of  
12 bevacizumab. Patients ages 12 through 17 will also have weekly BP monitoring for  
13 the first six weeks. Hypertensive medication should be initiated or increased for  
14 optimal BP control according to standard public health guidelines. Specific guidelines  
15 for the management of hypertension are provided for children 12 through 17 years old  
16 enrolled on this trial, similar to other CTEP sponsored protocols (Sections 2.8, 6, 9.2,  
17 10, and Appendix F).  
18

19 Proteinuria. Proteinuria (including albuminuria) should be monitored prior to every  
20 other infusion by either urine analysis for urine protein creatinine (UPC) ratio or by  
21 urine dipstick and dose adjusted per the chart below.  
22

|                                                                                                                                                                  |                                         |                                                                                                                                                                                                                                                                     |
|------------------------------------------------------------------------------------------------------------------------------------------------------------------|-----------------------------------------|---------------------------------------------------------------------------------------------------------------------------------------------------------------------------------------------------------------------------------------------------------------------|
| Proteinuria<br>Proteinuria will be<br>monitored by urine analysis<br>dipstick. If Dipstick $\geq 2+$<br>proteinuria, 24-hour urine<br>protein should be obtained | Dipstick $\geq 2+$<br>or UPC $\geq 0.5$ | Hold bevacizumab and obtain 24 hour urine protein                                                                                                                                                                                                                   |
|                                                                                                                                                                  | If 24-h urine<br>protein $< 2g$         | Continue bevacizumab                                                                                                                                                                                                                                                |
|                                                                                                                                                                  | If 24-h urine<br>protein $\geq 2 g$     | <ul style="list-style-type: none"><li>Hold bevacizumab until 24-hour urine protein <math>&lt; 2.0 g</math></li><li>Discontinue bevacizumab if urine protein does not<br/>recover to <math>&lt; 2.0 g</math> after 8 weeks of bevacizumab<br/>interruption</li></ul> |

23  
24 Surgery and wound complication issues and surgery. The appropriate interval from  
25 discontinuation of bevacizumab to subsequent elective surgery required to reduce the  
26 risk of impaired wound healing has not been determined. Decision on such an interval  
27 should take into consideration the half-life of bevacizumab. It is generally  
28 recommended that bevacizumab should be discontinued at least 4-8 weeks prior to  
29 major elective surgery. In addition, bevacizumab should not be restarted until at least  
30 4 weeks after major surgery provided that the wound has adequately healed; in cases  
31 of high-risk procedures such as liver resection, thoracotomy or neurosurgery, it is  
32 recommended that bevacizumab be resumed no earlier than 8 weeks after surgery.  
33

34 Bony toxicity. Children 12 through 17 years old will be carefully monitored for the  
35 development of bony toxicity (Sections 2.8, 6, 9.2, 10, and Appendix F).  
36

#### 37 Ovarian Failure/Irregular Menstruation:

38 Ovarian failure, defined as amenorrhea lasting 3 or more months with follicle-stimulating  
39 hormone (FSH) elevation ( $\geq 30$  mIU/mL), has recently been shown to be associated with the  
40 use of bevacizumab in patients with various solid tumor receiving bevacizumab in combination  
41 with cytotoxic chemotherapies. Specifically, the incidence of ovarian failure was increased

1 in patients receiving adjuvant bevacizumab plus mFOLFOX compared to mFOLFOX alone  
2 (34% vs. 2%). After discontinuation of bevacizumab, resumption of menses and an FSH  
3 level <30 mIU/mL was demonstrated in 22% (7/32) of these women.

4 The CTCAE grading of irregular menstruation is grade 1: intermittent menses with skipped menses  
5 for no more than 1-3 months, grade 2: intermittent menses with skipped menses for more than 4-6  
6 months and grade 3: persistent amenorrheas for more than 6 months. All patients enrolled on this  
7 study of childbearing potential are notified of the risk associated with bevacizumab and the fact that the  
8 long term effects of bevacizumab exposure on fertility are unknown. If patients develop  $\geq$ grade 2 irregular  
9 menstruation that is  $\geq$ possible in its attribution to bevacizumab, they are permitted to stay on drug despite  
10 this adverse event as long as the local investigator and study PI have confirmed with the patient the  
11 potential short and long term risks to fertility by continuing bevacizumab and that the patient wishes to  
12 stay on study drug despite these risks. 5.2 General Concomitant Medication

### 13 and Supportive Care Guidelines

14 There is no known interaction of bevacizumab with other concomitantly administered  
15 drugs. Prophylactic low-dose (81 mg or 325 mg/day) acetylsalicylic acid and  
16 systemic anticoagulation is allowed (LMWH preferred relative to warfarin). Other  
17 medication considered necessary for the subject's safety and well being may be given  
18 at the discretion of the investigator.

### 20 5.3 Duration of Therapy

21 In the absence of treatment delays due to adverse event(s), treatment may continue  
22 for 8 cycles (48 weeks) or until one of the following criteria applies (whichever  
23 occurs first):

- 24 • Decline in word recognition score below the 95% critical difference  
25 interval from baseline score in the target ear (Appendix C)
- 26 • Radiographic progression of the target VS  $\geq$ 20% increase in volume  
27 from baseline AND neurologically symptomatic or deemed by the  
28 treating physician or PI to be of medical risk requiring alternative  
29 therapies
- 30 • Progression of other NF2-associated tumors (contralateral VS,  
31 meningiomas, or ependymomas) that require additional or alternate  
32 therapies. Note that growth of other NF2-associated tumors that is  
33 consistent with the natural history of the disease, is not symptomatic,  
34 and does not require treatment is not a criterion for discontinuing  
35 protocol therapy
- 36 • Intercurrent illness that prevents further administration of treatment
- 37 • Unacceptable adverse event(s)
- 38 • Patient (and parent/guardian) decide to withdraw from the study
- 39 • General or specific changes in the patient's condition rendering the  
40 patient unacceptable for further treatment in the judgment of the  
41 investigator
- 42 •
- 43 •
- 44 •
- 45 •
- 46 •
- 47 •
- 48 •
- 49 •



1 As mentioned, there is a theoretical concern about the risk of rebound edema after  
 2 discontinuation of therapy. Patients will undergo evaluations at 3 and 6 months after  
 3 stopping bevacizumab. As detailed above, patients with a decline in word recognition  
 4 score within 6 months after discontinuation of study drug can be considered for  
 5 application for compassionate use. In addition, patients who report acute hearing loss  
 6 (defined as hearing loss with onset over a period of less than 72 hours) at any time on  
 7 study can be considered for a course of high dose glucocorticoids (typically  
 8 prednisone 60 mg daily for 10 days followed by a taper of 10 mg/ every 3 days until  
 9 off) at the discretion of the treating physician. Glucocorticoids should not be used for  
 10 gradual hearing decline or as a concurrent therapy with bevacizumab.

11  
 12 **5.4 Duration of Follow Up**  
 13 Patients without progressive hearing loss or removal from study for any of the reasons  
 14 listed in section 5.3 will be followed for 6 months on study after they have completed  
 15 treatment. Thereafter, patients will be asked to submit standard clinical parameters  
 16 including: MRI brain, audiometry reports, tumor related treatments or procedures, and  
 17 adverse events at 3 month intervals for a total of one year. Hence, the total duration  
 18 of follow-up will be 6 months after stopping bevacizumab with formal evaluations at  
 19 3 and 6 months and 12 months thereafter with standard clinical assessments (total of  
 20 18 months) or until removal from study or death. Patients removed from treatment  
 21 for unacceptable adverse events will be followed until resolution or stabilization of  
 22 the adverse event.

23  
 24 **5.5 Criteria for Removal from Study**  
 25 Patients will be removed from study when any of the criteria listed in Section 5.3  
 26 applies. The reason for study removal and the date the patient was removed must be  
 27 documented in the Case Report Form. Patients who discontinue treatment with  
 28 bevacizumab due to bevacizumab related toxicity will be monitored on protocol until  
 29 resolution of the toxicities.

30  
 31  
 32 **6. DOSING DELAYS/DOSE MODIFICATIONS**

33  
 34 Note1: There will be no dose reduction for bevacizumab. Treatment should be interrupted or  
 35 discontinued for certain adverse events, as described below

36  
 37 Note 2: If bevacizumab is interrupted for ANY reasons for > 4 weeks (unless otherwise  
 38 specified), the patient should discontinue bevacizumab therapy on protocol.

39  
 40 **Treatment Modification for Bevacizumab-Related Adverse Events**

| Event | CTCAE . v4.0 Grade | Action to be Taken |
|-------|--------------------|--------------------|
|-------|--------------------|--------------------|

| Event                                                                                                                                                                                         | CTCAE . v4.0 Grade                                                                                                                                                                                                                                                                                              | Action to be Taken                                                                                                                                                                                                                                                                                                                                                                                                                                                                                                                                                                                                                                                                                                                                                                                                                                                                                                                                                   |
|-----------------------------------------------------------------------------------------------------------------------------------------------------------------------------------------------|-----------------------------------------------------------------------------------------------------------------------------------------------------------------------------------------------------------------------------------------------------------------------------------------------------------------|----------------------------------------------------------------------------------------------------------------------------------------------------------------------------------------------------------------------------------------------------------------------------------------------------------------------------------------------------------------------------------------------------------------------------------------------------------------------------------------------------------------------------------------------------------------------------------------------------------------------------------------------------------------------------------------------------------------------------------------------------------------------------------------------------------------------------------------------------------------------------------------------------------------------------------------------------------------------|
| Allergic reactions<br>or<br>Infusion-related reactions<br>Or<br>Anaphylaxis                                                                                                                   | Grade 1-2                                                                                                                                                                                                                                                                                                       | <p>Infusion of bevacizumab should be interrupted for subjects who develop dyspnea or clinically significant hypotension.</p> <p>For infusion-associated symptoms not specified above, infusion should be slowed to 50% or less or interrupted. Upon complete resolution of the symptoms, infusion may be continued at no more than 50% of the rate prior to the reaction and increased in 50% increments every 30 minutes if well tolerated. Infusions may be restarted at the full rate during the next cycle.</p> <p>Subjects who experience bronchospasm (regardless of grade) should discontinue bevacizumab.</p>                                                                                                                                                                                                                                                                                                                                                |
|                                                                                                                                                                                               | G3-4                                                                                                                                                                                                                                                                                                            | Discontinue bevacizumab                                                                                                                                                                                                                                                                                                                                                                                                                                                                                                                                                                                                                                                                                                                                                                                                                                                                                                                                              |
| Thromboembolic Event (Arterial); arterial ischemia<br>- Cardiac ischemia<br>- Myocardial infarction<br>- CNS ischemia (TIA, CVA)<br>- any peripheral or visceral arterial ischemia/thrombosis | Grade 2 (new or worsening since bevacizumab)                                                                                                                                                                                                                                                                    | Discontinue bevacizumab.                                                                                                                                                                                                                                                                                                                                                                                                                                                                                                                                                                                                                                                                                                                                                                                                                                                                                                                                             |
|                                                                                                                                                                                               | Grade 3-4                                                                                                                                                                                                                                                                                                       | Discontinue bevacizumab                                                                                                                                                                                                                                                                                                                                                                                                                                                                                                                                                                                                                                                                                                                                                                                                                                                                                                                                              |
| Thromboembolic Event Venous)                                                                                                                                                                  | [Note: Patients with lung cancer requiring therapeutic anticoagulation should discontinue bevacizumab]                                                                                                                                                                                                          |                                                                                                                                                                                                                                                                                                                                                                                                                                                                                                                                                                                                                                                                                                                                                                                                                                                                                                                                                                      |
|                                                                                                                                                                                               | Grade 3<br>OR<br>asymptomatic Grade 4                                                                                                                                                                                                                                                                           | <ul style="list-style-type: none"> <li>▪ Hold bevacizumab treatment. If the planned duration of full-dose anticoagulation is &lt;2weeks, bevacizumab should be held until the full-dose anticoagulation period is over.</li> <li>▪ If the planned duration of full-dose anticoagulation is &gt;2 weeks, bevacizumab may be resumed during full-dose anticoagulation IF <u>all</u> of the criteria below are met: <ul style="list-style-type: none"> <li>– The subject must not have pathological conditions that carry high risk of bleeding (e.g. tumor involving major vessels or other conditions)</li> <li>– The subject must not have had hemorrhagic events while on study</li> <li>– The subject must on stable dose of heparin or have an in-range INR (usually 2-3) on a stable dose of warfarin prior to restarting bevacizumab.</li> </ul> </li> <li>▪ If thromboemboli worsen/recur upon resumption of study therapy, discontinue bevacizumab</li> </ul> |
|                                                                                                                                                                                               | Grade 4 (symptomatic)                                                                                                                                                                                                                                                                                           | Discontinue bevacizumab                                                                                                                                                                                                                                                                                                                                                                                                                                                                                                                                                                                                                                                                                                                                                                                                                                                                                                                                              |
| Hypertension*                                                                                                                                                                                 | [Treat with anti-hypertensive medication as needed. The goal of BP control should be consistent with general medical practice, including confirming that BP is elevated across three separate measurements on three separate days and all other contributing factors have been addressed (i.e. pain, anxiety).] |                                                                                                                                                                                                                                                                                                                                                                                                                                                                                                                                                                                                                                                                                                                                                                                                                                                                                                                                                                      |
|                                                                                                                                                                                               | Grade 1<br>(SBP 120-139 mmHg or DBP80-89 mm Hg)                                                                                                                                                                                                                                                                 | Consider increased BP monitoring; start anti-hypertensive medication if appropriate                                                                                                                                                                                                                                                                                                                                                                                                                                                                                                                                                                                                                                                                                                                                                                                                                                                                                  |
|                                                                                                                                                                                               | Grade 2 asymptomatic<br>(SBP 140-159 mmHg or DBP 90-99 mm Hg)                                                                                                                                                                                                                                                   | Begin anti-hypertensive therapy and continue bevacizumab                                                                                                                                                                                                                                                                                                                                                                                                                                                                                                                                                                                                                                                                                                                                                                                                                                                                                                             |

| Event                                  | CTCAE . v4.0 Grade                                                                                                                                                                                                             | Action to be Taken                                                                                                                                                                                                                                                                                                                                                                                                                                                                                                                                                                                                                                        |
|----------------------------------------|--------------------------------------------------------------------------------------------------------------------------------------------------------------------------------------------------------------------------------|-----------------------------------------------------------------------------------------------------------------------------------------------------------------------------------------------------------------------------------------------------------------------------------------------------------------------------------------------------------------------------------------------------------------------------------------------------------------------------------------------------------------------------------------------------------------------------------------------------------------------------------------------------------|
|                                        | <ul style="list-style-type: none"> <li>Grade 2 symptomatic (SBP 140-160 mmHg or DBP 90-100 mm Hg)</li> <li>– Grade 3 (<math>\geq</math> SBP 160 mmHg or <math>\geq</math> DBP 100 mmHg)</li> </ul>                             | <ul style="list-style-type: none"> <li>Start or adjust anti-hypertensive medication</li> <li>Hold bevacizumab until symptoms resolve <b>AND</b> BP &lt; 160/90mmHg*</li> </ul>                                                                                                                                                                                                                                                                                                                                                                                                                                                                            |
|                                        | Grade 4                                                                                                                                                                                                                        | Discontinue bevacizumab.                                                                                                                                                                                                                                                                                                                                                                                                                                                                                                                                                                                                                                  |
| Heart Failure or LV dysfunction        | Grade 3                                                                                                                                                                                                                        | Discontinue bevacizumab                                                                                                                                                                                                                                                                                                                                                                                                                                                                                                                                                                                                                                   |
|                                        | Grade 4                                                                                                                                                                                                                        | Discontinue bevacizumab                                                                                                                                                                                                                                                                                                                                                                                                                                                                                                                                                                                                                                   |
| Proteinuria                            | [Proteinuria should be monitored by urine analysis for urine protein creatinine (UPC) ratio, or dipstick prior to every other dose of bevacizumab. If dipstick shows 2+ proteinuria, 24-hour urine protein should be obtained] |                                                                                                                                                                                                                                                                                                                                                                                                                                                                                                                                                                                                                                                           |
|                                        | UPC ratio < 3.5 or 24-h urine protein < 3.5 gm                                                                                                                                                                                 | Continue bevacizumab.                                                                                                                                                                                                                                                                                                                                                                                                                                                                                                                                                                                                                                     |
|                                        | UPC ratio $\geq$ 3.5 or 24-h urine protein $\geq$ 3.5 gm                                                                                                                                                                       | Hold bevacizumab until it UPC recovers to < 3.5, or 24-h urine protein < 3.5 gm.<br>Discontinue bevacizumab if urine protein does not recover to < 3.5 after 8 weeks or bevacizumab interruption                                                                                                                                                                                                                                                                                                                                                                                                                                                          |
|                                        | Nephrotic syndrome                                                                                                                                                                                                             | Discontinue bevacizumab.                                                                                                                                                                                                                                                                                                                                                                                                                                                                                                                                                                                                                                  |
| Hemorrhage (intracranial or pulmonary) | Grade 2-4                                                                                                                                                                                                                      | Discontinue bevacizumab                                                                                                                                                                                                                                                                                                                                                                                                                                                                                                                                                                                                                                   |
|                                        | Grade 1                                                                                                                                                                                                                        | <ul style="list-style-type: none"> <li>Patients receiving full-dose anticoagulation should discontinue bevacizumab.</li> <li>For patients not on full-dose anticoagulation, hold bevacizumab until ALL of the following criteria are met: <ul style="list-style-type: none"> <li>- the bleeding has resolved and Hb is stable</li> <li>- there is no bleeding diathesis that would increase the risk of therapy</li> </ul> </li> <li>there is no anatomic or pathologic condition that could increase the risk of hemorrhage recurrence</li> </ul>                                                                                                        |
| Hemorrhage (any other organ systems)   | Grade 3                                                                                                                                                                                                                        | <ul style="list-style-type: none"> <li>Patients receiving full-dose anticoagulation should discontinue bevacizumab.</li> <li>For patients not on full-dose anticoagulation, hold bevacizumab until ALL of the following criteria are met: <ul style="list-style-type: none"> <li>- the bleeding has resolved and Hb is stable</li> <li>- there is no bleeding diathesis that would increase the risk of therapy</li> <li>- there is no anatomic or pathologic condition that could increase the risk of hemorrhage recurrence.</li> </ul> </li> <li>Patients who experience recurrence of grade 3 hemorrhage should discontinue study therapy.</li> </ul> |
|                                        | Grade 4                                                                                                                                                                                                                        | Discontinue bevacizumab                                                                                                                                                                                                                                                                                                                                                                                                                                                                                                                                                                                                                                   |
| Platelet count decreased               | Grade 1-2                                                                                                                                                                                                                      | <ul style="list-style-type: none"> <li>Hold bevacizumab until resolution of platelet count to greater than or equal to lower limit of institutional normal</li> </ul>                                                                                                                                                                                                                                                                                                                                                                                                                                                                                     |
|                                        | Less than lower limit of institutional normal down to 50,000                                                                                                                                                                   | <ul style="list-style-type: none"> <li>Monitor for bleeding episodes</li> <li>Weekly platelet evaluation until platelet count is greater than 100,000</li> </ul>                                                                                                                                                                                                                                                                                                                                                                                                                                                                                          |

| Event                                                                                                          | CTCAE . v4.0 Grade                | Action to be Taken                                                                                                                                                                                                                                                                                                                   |
|----------------------------------------------------------------------------------------------------------------|-----------------------------------|--------------------------------------------------------------------------------------------------------------------------------------------------------------------------------------------------------------------------------------------------------------------------------------------------------------------------------------|
|                                                                                                                | G3-4<br>Less than 50,000          | <ul style="list-style-type: none"> <li>Discontinue bevacizumab if low platelet count is attributed as possibly, probably, or definitely related to study drug</li> <li>Discontinue bevacizumab until recovery to greater than or equal to institutional normal if attributed as not related or unlikely to be related</li> </ul>     |
| RPLS (Reversible Posterior Leukoencephalopathy syndrome or PRES (Posterior Reversible Encephalopathy Syndrome) |                                   | Discontinue bevacizumab upon diagnosis of RPLS.                                                                                                                                                                                                                                                                                      |
| Wound dehiscence requiring medical or surgical intervention                                                    |                                   | Discontinue bevacizumab                                                                                                                                                                                                                                                                                                              |
| Perforation (GI, or any other organ)                                                                           |                                   | Discontinue bevacizumab                                                                                                                                                                                                                                                                                                              |
| Fistula (GI, pulmonary or any other organ)                                                                     |                                   | Discontinue bevacizumab                                                                                                                                                                                                                                                                                                              |
| Obstruction of GI tract                                                                                        | G2 requiring medical intervention | <ul style="list-style-type: none"> <li>Hold bevacizumab until complete resolution</li> </ul>                                                                                                                                                                                                                                         |
|                                                                                                                | G3-4                              | <ul style="list-style-type: none"> <li>Hold bevacizumab until complete resolution</li> <li>If surgery is required, patient may restart bevacizumab after full recovery from surgery, and at investigator's discretion</li> </ul>                                                                                                     |
| Other Unspecified bevacizumab-related AEs (except controlled nausea/vomiting).                                 | Grade 3+                          | <ul style="list-style-type: none"> <li>Hold bevacizumab until symptoms resolve to <math>\leq</math> grade 1</li> </ul>                                                                                                                                                                                                               |
|                                                                                                                | Grade 4                           | <ul style="list-style-type: none"> <li>Discontinue bevacizumab</li> <li>Upon consultation with the study chair, resumption of bevacizumab may be considered if a patient is benefiting from therapy, and the G4 toxicity is transient, has recovered to <math>\leq</math> grade 1 and unlikely to recur with retreatment.</li> </ul> |

1 + Patients of childbearing age whom develop grade  $\geq 2$  toxicity based on CTCEA for irregular menstruation attributed to  
2 bevacizumab as >possible can remain on treatment with consent of the patient regarding long term risk for fertility and under the  
3 discretion of the study PI.  
4  
5

6 \*Specific guidelines for the management of hypertension are provided for children 12 through 17  
7 years (Appendix F). If more specific guidelines for hypertension for adults are preferred by the  
8 investigators or required for certain protocols, the following guidelines can be used  
9

|                         |                                                                                                                                                                                                                                                                                                                 |                                                                     |
|-------------------------|-----------------------------------------------------------------------------------------------------------------------------------------------------------------------------------------------------------------------------------------------------------------------------------------------------------------|---------------------------------------------------------------------|
| Hypertension in adults* | [Treat with anti-hypertensive medication as needed. The goal of BP control should be consistent with general medical practice, including confirming that BP is elevated across three separate measurements on three separate days and all other contributing factors have been addressed (i.e. pain, anxiety).] |                                                                     |
|                         | Grade 1                                                                                                                                                                                                                                                                                                         | Consider increased BP monitoring                                    |
|                         | Grade 2 asymptomatic but diastolic BP < 100 mmHg                                                                                                                                                                                                                                                                | Begin anti-hypertensive therapy and continue bevacizumab            |
|                         | -Grade 2-3 Symptomatic OR<br>-Diastolic BP > 100 mmHg                                                                                                                                                                                                                                                           | Hold bevacizumab should until symptoms resolve AND BP < 160/90mmHg* |

|  |         |                                     |
|--|---------|-------------------------------------|
|  | Grade 4 | Discontinue bevacizumab permanently |
|--|---------|-------------------------------------|

\*Current CTCAE definitions used by CTEP:

- Grade 1: asymptomatic, transient (< 24 hours) increase by > 20 mmHg (diastolic) or to >150/100 if previously WNL; intervention not indicated
- Grade 2: recurrent or persistent (> 24 hours) or symptomatic increase by > 20 mmHg (diastolic) or to > 150/100 if previously WNL; monotherapy may be indicated
- Grade 3: requiring more than one drug or more intensive therapy than previously
- Grade 4: life threatening (e.g. hypertensive crisis)

Dose-limiting hypertension in children 12 through 17 years:

Any patient with a diastolic blood pressure greater than 25 mmHg above the 95<sup>th</sup> for age and gender (Appendix F) confirmed by repeated measurements is dose limiting and will result in discontinuation of bevacizumab (see Appendix F for assessment of blood pressure recordings and for management).

In patients on antihypertensive therapy, a diastolic blood pressure  $\geq$ 25 mmHg above the 95<sup>th</sup> % for age and gender for >14 days is dose-limiting and will result in discontinuation of bevacizumab (see Appendix F).

Dose limiting bony changes in children 12 through 17 years

Growth plate abnormalities

ID measurement through mid growth plate on sagittal view and volumetric measurements via an automated image analysis adapted from the MEDx software program used for volumetric analysis of PN (section 2.8 and Appendix F) will be used to measure growth plate changes. Growth plate expansion greater than 2 times the volume from baseline to interval measurement will be considered dose limiting and result in discontinuation of bevacizumab. Volumetric analysis will be done centrally at NCI.

Bone Density abnormalities

Patients with a >6% bone mineral density (BMD) decrease on lumbar spine DEXA scan relative from baseline to restaging on therapy AND a BMD Z score at the lumbar spine of <-2.5 will be considered dose limiting and result in discontinuation of bevacizumab (see Appendix F for treatment modification for abnormal DEXA lumbar spine scan). These parameters are based on experience gained from a previous study of tenofovir and impact on bone mineral density (BMD) in HIV-infected children (102, 103) .

7. ADVERSE EVENTS: LIST AND REPORTING REQUIREMENTS

Adverse event (AE) monitoring and reporting is a routine part of every clinical trial. The following list of AEs (Section 7.1) and the characteristics of an observed AE (Section 7.2) will determine whether the event requires expedited (via AdeERS) reporting in addition to routine reporting.

7.1 Comprehensive Adverse Events and Potential Risks List (CAEPR)

The Comprehensive Adverse Event and Potential Risks list (CAEPR) provides a single list of reported

1 and/or potential adverse events (AE) associated with an agent using a uniform presentation of events  
 2 by body system. In addition to the comprehensive list, a subset, the Specific Protocol Exceptions to  
 3 Expedited Reporting (SPEER), appears in a separate column and is identified with **bold** and  
 4 **italicized** text. This subset of AEs (SPEER) is a list of events that are protocol specific exceptions to  
 5 expedited reporting to NCI via AdEERS (except as noted below). Refer to the 'CTEP, NCI  
 6 Guidelines: Adverse Event Reporting Requirements'  
 7 [http://ctep.cancer.gov/protocolDevelopment/electronic\\_applications/docs/aeguidelines.pdf](http://ctep.cancer.gov/protocolDevelopment/electronic_applications/docs/aeguidelines.pdf) for further  
 8 clarification.  
 9

10 **NOTE:** Report AEs on the SPEER **ONLY IF** they exceed the grade noted in parentheses next to the  
 11 AE in the SPEER. If this CAEPR is part of a combination protocol using multiple investigational  
 12 agents and has an AE listed on different SPEERs, use the lower of the grades to determine if  
 13 expedited reporting is required.

Version 2.2, October 21, 2011<sup>1</sup>

| Adverse Events with Possible Relationship to Bevacizumab (rhuMab VEGF) (CTCAE 4.0 Term) |                                           |                                                                                 | Specific Protocol Exceptions to Expedited Reporting (SPEER)<br>(formerly known as ASAE) |
|-----------------------------------------------------------------------------------------|-------------------------------------------|---------------------------------------------------------------------------------|-----------------------------------------------------------------------------------------|
| Likely (>20%)                                                                           | Less Likely (<=20%)                       | Rare but Serious (<3%)                                                          |                                                                                         |
| <b>BLOOD AND LYMPHATIC SYSTEM DISORDERS</b>                                             |                                           |                                                                                 |                                                                                         |
|                                                                                         | Anemia                                    |                                                                                 | <b>Anemia (Gr. 3)</b>                                                                   |
|                                                                                         |                                           | Blood and lymphatic system disorders - Other (renal thrombotic microangiopathy) |                                                                                         |
|                                                                                         | Febrile neutropenia                       |                                                                                 | <b>Febrile neutropenia (Gr. 3)</b>                                                      |
| <b>CARDIAC DISORDERS</b>                                                                |                                           |                                                                                 |                                                                                         |
|                                                                                         |                                           | Acute coronary syndrome                                                         |                                                                                         |
|                                                                                         |                                           | Heart failure                                                                   |                                                                                         |
|                                                                                         |                                           | Left ventricular systolic dysfunction                                           |                                                                                         |
|                                                                                         |                                           | Myocardial infarction                                                           |                                                                                         |
|                                                                                         | Supraventricular tachycardia              |                                                                                 | <b>Supraventricular tachycardia (Gr. 3)</b>                                             |
|                                                                                         |                                           | Ventricular arrhythmia                                                          |                                                                                         |
|                                                                                         |                                           | Ventricular fibrillation                                                        |                                                                                         |
| <b>EAR AND LABYRINTH DISORDERS</b>                                                      |                                           |                                                                                 |                                                                                         |
|                                                                                         | Vertigo                                   |                                                                                 |                                                                                         |
| <b>GASTROINTESTINAL DISORDERS</b>                                                       |                                           |                                                                                 |                                                                                         |
|                                                                                         | Abdominal pain                            |                                                                                 | <b>Abdominal pain (Gr. 3)</b>                                                           |
|                                                                                         | Colitis                                   |                                                                                 | <b>Colitis (Gr. 3)</b>                                                                  |
|                                                                                         | Constipation                              |                                                                                 | <b>Constipation (Gr. 3)</b>                                                             |
|                                                                                         | Diarrhea                                  |                                                                                 | <b>Diarrhea (Gr. 3)</b>                                                                 |
|                                                                                         | Dyspepsia                                 |                                                                                 | <b>Dyspepsia (Gr. 2)</b>                                                                |
|                                                                                         |                                           | Gastrointestinal fistula <sup>2</sup>                                           |                                                                                         |
|                                                                                         | Gastrointestinal hemorrhage <sup>3</sup>  |                                                                                 | <b>Gastrointestinal hemorrhage<sup>3</sup> (Gr. 2)</b>                                  |
|                                                                                         | Gastrointestinal obstruction <sup>4</sup> |                                                                                 |                                                                                         |
|                                                                                         |                                           | Gastrointestinal perforation <sup>5</sup>                                       |                                                                                         |
|                                                                                         |                                           | Gastrointestinal ulcer <sup>6</sup>                                             |                                                                                         |
|                                                                                         | Ileus                                     |                                                                                 |                                                                                         |
|                                                                                         | Mucositis oral                            |                                                                                 | <b>Mucositis oral (Gr. 3)</b>                                                           |
|                                                                                         | Nausea                                    |                                                                                 | <b>Nausea (Gr. 3)</b>                                                                   |
|                                                                                         | Vomiting                                  |                                                                                 | <b>Vomiting (Gr. 3)</b>                                                                 |

| GENERAL DISORDERS AND ADMINISTRATION SITE CONDITIONS |                                                                                                  |                                                          |                                                     |
|------------------------------------------------------|--------------------------------------------------------------------------------------------------|----------------------------------------------------------|-----------------------------------------------------|
|                                                      | Fatigue                                                                                          |                                                          | <b>Fatigue (Gr. 3)</b>                              |
|                                                      | Infusion related reaction                                                                        |                                                          | <b>Infusion related reaction (Gr. 2)</b>            |
|                                                      | Non-cardiac chest pain                                                                           |                                                          | <b>Non-cardiac chest pain (Gr. 3)</b>               |
|                                                      | Pain                                                                                             |                                                          | <b>Pain (Gr. 3)</b>                                 |
| IMMUNE SYSTEM DISORDERS                              |                                                                                                  |                                                          |                                                     |
|                                                      | Allergic reaction                                                                                |                                                          | <b>Allergic reaction (Gr. 2)</b>                    |
|                                                      |                                                                                                  | Anaphylaxis                                              |                                                     |
| INFECTIONS AND INFESTATIONS                          |                                                                                                  |                                                          |                                                     |
|                                                      | Infection <sup>7</sup>                                                                           |                                                          | <b>Infection<sup>7</sup> (Gr. 3)</b>                |
|                                                      | Infections and infestations - Other (peri-rectal abscess)                                        |                                                          |                                                     |
| INJURY, POISONING AND PROCEDURAL COMPLICATIONS       |                                                                                                  |                                                          |                                                     |
|                                                      |                                                                                                  | Gastrointestinal anastomotic leak                        |                                                     |
|                                                      | Wound dehiscence                                                                                 |                                                          | <b>Wound dehiscence (Gr. 2)</b>                     |
| INVESTIGATIONS                                       |                                                                                                  |                                                          |                                                     |
|                                                      | Alanine aminotransferase increased                                                               |                                                          | <b>Alanine aminotransferase increased (Gr. 3)</b>   |
|                                                      | Alkaline phosphatase increased                                                                   |                                                          | <b>Alkaline phosphatase increased (Gr. 3)</b>       |
|                                                      | Aspartate aminotransferase increased                                                             |                                                          | <b>Aspartate aminotransferase increased (Gr. 3)</b> |
|                                                      | Blood bilirubin increased                                                                        |                                                          | <b>Blood bilirubin increased (Gr. 2)</b>            |
|                                                      | Cardiac troponin I increased                                                                     |                                                          |                                                     |
|                                                      | Neutrophil count decreased                                                                       |                                                          | <b>Neutrophil count decreased (Gr. 3)</b>           |
|                                                      | Weight loss                                                                                      |                                                          | <b>Weight loss (Gr. 3)</b>                          |
|                                                      | White blood cell decreased                                                                       |                                                          | <b>White blood cell decreased (Gr. 3)</b>           |
| METABOLISM AND NUTRITION DISORDERS                   |                                                                                                  |                                                          |                                                     |
|                                                      | Anorexia                                                                                         |                                                          | <b>Anorexia (Gr. 3)</b>                             |
| MUSCULOSKELETAL AND CONNECTIVE TISSUE DISORDERS      |                                                                                                  |                                                          |                                                     |
|                                                      | Arthralgia                                                                                       |                                                          | <b>Arthralgia (Gr. 3)</b>                           |
|                                                      | Musculoskeletal and connective tissue disorder - Other (bone metaphyseal dysplasia) <sup>8</sup> |                                                          |                                                     |
|                                                      | Myalgia                                                                                          |                                                          | <b>Myalgia (Gr. 3)</b>                              |
|                                                      | Osteonecrosis of jaw <sup>9</sup>                                                                |                                                          |                                                     |
| NERVOUS SYSTEM DISORDERS                             |                                                                                                  |                                                          |                                                     |
|                                                      | Dizziness                                                                                        |                                                          | <b>Dizziness (Gr. 2)</b>                            |
|                                                      | Headache                                                                                         |                                                          | <b>Headache (Gr. 3)</b>                             |
|                                                      |                                                                                                  | Intracranial hemorrhage                                  |                                                     |
|                                                      |                                                                                                  | Ischemia cerebrovascular                                 |                                                     |
|                                                      | Peripheral sensory neuropathy <sup>10</sup>                                                      |                                                          |                                                     |
|                                                      |                                                                                                  | Reversible posterior leukoencephalopathy syndrome        |                                                     |
|                                                      | Syncope                                                                                          |                                                          |                                                     |
| RENAL AND URINARY DISORDERS                          |                                                                                                  |                                                          |                                                     |
|                                                      |                                                                                                  | Acute kidney injury                                      |                                                     |
|                                                      | Hematuria                                                                                        |                                                          | <b>Hematuria (Gr. 3)</b>                            |
|                                                      | Proteinuria                                                                                      |                                                          | <b>Proteinuria (Gr. 2)</b>                          |
|                                                      |                                                                                                  | Renal and urinary disorders - Other (Nephrotic Syndrome) |                                                     |
|                                                      |                                                                                                  | Urinary fistula                                          |                                                     |
| REPRODUCTIVE SYSTEM AND BREAST DISORDERS             |                                                                                                  |                                                          |                                                     |

|                                                                                  |                      |                                                                                      |                                     |
|----------------------------------------------------------------------------------|----------------------|--------------------------------------------------------------------------------------|-------------------------------------|
| Reproductive system and breast disorders - Other (ovarian failure) <sup>11</sup> |                      |                                                                                      |                                     |
|                                                                                  |                      | Vaginal fistula                                                                      |                                     |
|                                                                                  | Vaginal hemorrhage   |                                                                                      | <b>Vaginal hemorrhage (Gr. 3)</b>   |
| <b>RESPIRATORY, THORACIC AND MEDIASTINAL DISORDERS</b>                           |                      |                                                                                      |                                     |
|                                                                                  | Allergic rhinitis    |                                                                                      | <b>Allergic rhinitis (Gr. 3)</b>    |
|                                                                                  |                      | Bronchopleural fistula                                                               |                                     |
|                                                                                  |                      | Bronchopulmonary hemorrhage                                                          |                                     |
|                                                                                  | Cough                |                                                                                      | <b>Cough (Gr. 3)</b>                |
|                                                                                  | Dyspnea              |                                                                                      | <b>Dyspnea (Gr. 2)</b>              |
|                                                                                  | Epistaxis            |                                                                                      | <b>Epistaxis (Gr. 3)</b>            |
|                                                                                  | Hoarseness           |                                                                                      | <b>Hoarseness (Gr. 3)</b>           |
|                                                                                  |                      | Respiratory, thoracic and mediastinal disorders - Other (nasal-septal perforation)   |                                     |
|                                                                                  |                      | Respiratory, thoracic and mediastinal disorders - Other (tracheo-esophageal fistula) |                                     |
| <b>SKIN AND SUBCUTANEOUS TISSUE DISORDERS</b>                                    |                      |                                                                                      |                                     |
|                                                                                  | Pruritus             |                                                                                      | <b>Pruritus (Gr. 2)</b>             |
|                                                                                  | Rash maculo-papular  |                                                                                      | <b>Rash maculo-papular (Gr. 2)</b>  |
|                                                                                  | Urticaria            |                                                                                      | <b>Urticaria (Gr. 2)</b>            |
| <b>VASCULAR DISORDERS</b>                                                        |                      |                                                                                      |                                     |
| Hypertension                                                                     |                      |                                                                                      | <b>Hypertension (Gr. 3)</b>         |
|                                                                                  | Thromboembolic event |                                                                                      | <b>Thromboembolic event (Gr. 3)</b> |
|                                                                                  |                      | Vascular disorders - Other (arterial thromboembolic event) <sup>12</sup>             |                                     |

1  
2 <sup>1</sup>This table will be updated as the toxicity profile of the agent is revised. Updates will be distributed to all  
3 Principal Investigators at the time of revision. The current version can be obtained by contacting  
4 [PIO@CTEP.NCI.NIH.GOV](mailto:PIO@CTEP.NCI.NIH.GOV). Your name, the name of the investigator, the protocol and the agent should  
5 be included in the e-mail.

6  
7 <sup>2</sup>Gastrointestinal fistula may include: Anal fistula, Colonic fistula, Duodenal fistula, Esophageal fistula,  
8 Gastric fistula, Gastrointestinal fistula, Rectal fistula, and other sites under the GASTROINTESTINAL  
9 DISORDERS SOC.

10  
11 <sup>3</sup>Gastrointestinal hemorrhage may include: Colonic hemorrhage, Duodenal hemorrhage, Esophageal  
12 hemorrhage, Esophageal varices hemorrhage, Gastric hemorrhage, Hemorrhoidal hemorrhage, Intra-  
13 abdominal hemorrhage, Oral hemorrhage, Rectal hemorrhage, and other sites under the  
14 GASTROINTESTINAL DISORDERS SOC.

15 <sup>4</sup>Gastrointestinal obstruction may include: Colonic obstruction, Duodenal obstruction, Esophageal  
16 obstruction, Ileal obstruction, Jejunal obstruction, Rectal obstruction, Small intestinal obstruction, and  
17 other sites under the GASTROINTESTINAL DISORDERS SOC.

18  
19 <sup>5</sup>Gastrointestinal perforation may include: Colonic perforation, Duodenal perforation, Esophageal  
20 perforation, Gastric perforation, Jejunal perforation, Rectal perforation, Small intestinal perforation, and  
21 other sites under the GASTROINTESTINAL DISORDERS SOC.

22  
23 <sup>6</sup>Gastrointestinal ulcer may include: Duodenal ulcer, Esophageal ulcer, Gastric ulcer, and other sites  
24 under the GASTROINTESTINAL DISORDERS SOC.  
25



1 <sup>7</sup>Infection may include any of the 75 infection sites under the INFECTIONS AND INFESTATIONS SOC.  
2

3 <sup>8</sup>Metaphyseal dysplasia was observed in young patients who still have active epiphyseal growth plates.  
4

5 <sup>9</sup>Cases of osteonecrosis of the jaw (ONJ) have been reported in cancer patients in association with  
6 bevacizumab treatment, the majority of whom had received prior or concomitant treatment with i.v.  
7 bisphosphonates.  
8

9 <sup>10</sup>Increased rate of peripheral sensory neuropathy has been observed in trials combining bevacizumab  
10 and chemotherapy compared to chemotherapy alone.

11 <sup>11</sup>Ovarian failure, defined as amenorrhea lasting 3 or more months with follicle-stimulating hormone (FSH)  
12 elevation ( $\geq 30$  mIU/mL), was increased in patients receiving adjuvant bevacizumab plus mFOLFOX  
13 compared to mFOLFOX alone (34% vs. 2%). After discontinuation of bevacizumab, resumption of  
14 menses and an FSH level  $< 30$  mIU/mL was demonstrated in 22% (7/32) of these women. Long term  
15 effects of bevacizumab exposure on fertility are unknown.

16 <sup>12</sup>Arterial thromboembolic event includes visceral arterial ischemia, peripheral arterial ischemia, heart  
17 attack, and stroke.  
18  
19

20 **Also reported on Bevacizumab (rhuMAb VEGF) trials but with the relationship to Bevacizumab**  
21 **(rhuMAb VEGF) still undetermined:**  
22

23 **BLOOD AND LYMPHATIC SYSTEM DISORDERS** - Blood and lymphatic system disorders - Other  
24 (idiopathic thrombocytopenia purpura); Disseminated intravascular coagulation

25 **CARDIAC DISORDERS** - Pericardial effusion

26 **GENERAL DISORDERS AND ADMINISTRATION SITE CONDITIONS** - Gait disturbance; Sudden death  
27 NOS

28 **HEPATOBIILIARY DISORDERS** - Hepatic failure

29 **INFECTIONS AND INFESTATIONS** - Infections and infestations - Other (aseptic meningitis)

30 **INVESTIGATIONS** - Platelet count decreased

31 **METABOLISM AND NUTRITION DISORDERS** - Hyponatremia

32 **MUSCULOSKELETAL AND CONNECTIVE TISSUE DISORDERS** - Musculoskeletal and connective  
33 tissue disorder - Other (aseptic necrotic bone); Musculoskeletal and connective tissue disorder - Other  
34 (myasthenia gravis)

35 **NERVOUS SYSTEM DISORDERS** - Dysgeusia; Peripheral motor neuropathy; Seizure

36 **PSYCHIATRIC DISORDERS** - Confusion

37 **RESPIRATORY, THORACIC AND MEDIASTINAL DISORDERS** - Adult respiratory distress syndrome;  
38 Pneumonitis; Pneumothorax; Pulmonary hypertension

39 **SKIN AND SUBCUTANEOUS TISSUE DISORDERS** - Palmar-plantar erythrodysesthesia syndrome;  
40 Skin ulceration

41 **Note:** Bevacizumab (rhuMAb VEGF) in combination with other agents could cause an exacerbation of  
42 any adverse event currently known to be caused by the other agent, or the combination may result in  
43 events never previously associated with either agent.  
44

## 45 7.2 Adverse Event Characteristics

46  
47 CTCAE term (AE description) and grade: The CTEP Active Version of the NCI  
48 Common Terminology Criteria for Adverse Events (CTCAE) will be utilized for AE  
49 reporting. The CTEP Active Version of the CTCAE is identified and located on the  
50 CTEP website at

51 [http://ctep.cancer.gov/protocolDevelopment/electronic\\_applications/ctc.htm](http://ctep.cancer.gov/protocolDevelopment/electronic_applications/ctc.htm). All  
52 appropriate treatment areas should have access to a copy of the CTEP Active Version  
53 of CTCAE.

1  
2 “Expectedness”: AEs can be ‘Unexpected’ or ‘Expected’ (see Section 7.1 above) for  
3 expedited reporting purposes only. ‘Expected’ AEs (the ASael) are bold and  
4 italicized in the CAEPR (Section 7.1.1).  
5

6 Attribution of the AE:

- 7 - Definite – The AE is clearly related to the study treatment.
- 8 - Probable – The AE is likely related to the study treatment.
- 9 - Possible – The AE may be related to the study treatment.
- 10 - Unlikely – The AE is doubtfully related to the study treatment.
- 11 - Unrelated – The AE is clearly NOT related to the study treatment.

12  
13 7.3 Expedited Adverse Event Reporting

14  
15 7.3.1 Expedited AE reporting for this study must use AdEERS (Adverse Event  
16 Expedited Reporting System), accessed via the CTEP home page  
17 (<http://ctep.cancer.gov>). The reporting procedures to be followed are presented in  
18 the “CTEP, NCI Guidelines: Adverse Event Reporting Requirements” which can  
19 be downloaded from the CTEP home page (<http://ctep.cancer.gov>). These  
20 requirements are briefly outlined in the table below (Section 7.3.3).  
21

22 In the rare occurrence when Internet connectivity is lost, an AE report may be  
23 submitted using CTEP's Adverse Event Expedited Report-Single Agent or  
24 Multiple Agent paper template (available at <http://ctep.cancer.gov>) and faxed to  
25 301-230-0159. A 24-hour notification is to be made to CTEP by telephone at 301-  
26 897-7497, only when Internet connectivity is disrupted. Once Internet  
27 connectivity is restored, an AE report submitted on a paper template or a 24-hour  
28 notification phoned in must be entered electronically into AdEERS by the original  
29 submitter at the site.  
30

31 7.3.2 AdEERS is programmed for automatic electronic distribution of reports to the  
32 following individuals: Study Coordinator of the Lead Organization, Principal  
33 Investigator, and the local treating physician. AdEERS provides a copy feature  
34 for other e-mail recipients.  
35

36 7.3.3 AdEERS Reporting Requirements for Adverse Events that occur within 30 Days<sup>1</sup>  
37 of the Last Dose of the Investigational Agent on Phase 2 and 3 Trials.  
38

| Phase 2 and 3 Trials |                         |            |          |                                 |                                    |                               |                                  |                           |                           |
|----------------------|-------------------------|------------|----------|---------------------------------|------------------------------------|-------------------------------|----------------------------------|---------------------------|---------------------------|
|                      | Grade 1                 | Grade 2    | Grade 2  | Grade 3                         |                                    | Grade 3                       |                                  | Grades 4 & 5 <sup>2</sup> | Grades 4 & 5 <sup>2</sup> |
|                      | Unexpected and Expected | Unexpected | Expected | Unexpected with Hospitalization | Unexpected without Hospitalization | Expected with Hospitalization | Expected without Hospitalization | Unexpected                | Expected                  |
|                      |                         |            |          |                                 |                                    |                               |                                  |                           |                           |

|                            |              |                  |              |                  |                  |                  |              |                          |                  |
|----------------------------|--------------|------------------|--------------|------------------|------------------|------------------|--------------|--------------------------|------------------|
| Unrelated Unlikely         | Not Required | Not Required     | Not Required | 10 Calendar Days | Not Required     | 10 Calendar Days | Not Required | 10 Calendar Days         | 10 Calendar Days |
| Possible Probable Definite | Not Required | 10 Calendar Days | Not Required | 10 Calendar Days | 10 Calendar Days | 10 Calendar Days | Not Required | 24-Hour; 5 Calendar Days | 10 Calendar Days |

<sup>1</sup> Adverse events with attribution of possible, probable, or definite that occur greater than 30 days after the last dose of treatment with an agent under a CTEP IND require reporting as follows:  
AdeERS 24-hour notification followed by complete report within 5 calendar days for:

- Grade 4 and Grade 5 unexpected events

AdeERS 10 calendar day report:

- Grade 3 unexpected events with hospitalization or prolongation of hospitalization
- Grade 5 expected events

<sup>2</sup> Although an AdeERS 24-hour notification is not required for death clearly related to progressive disease, a full report is required as outlined in the table.  
December 15, 2004

1  
2  
3  
4  
5  
6  
7  
8  
9  
10  
11  
12  
13  
14  
15  
16  
17  
18  
19  
20  
21  
22  
23  
24  
25  
26  
27  
28  
29

Note: All deaths on study require both routine and expedited reporting regardless of causality. Attribution to treatment or other cause must be provided.

- Expedited AE reporting timelines defined:
  - “24 hours; 5 calendar days” – The investigator must initially report the AE via AdeERS within 24 hours of learning of the event followed by a complete AdeERS report within 5 calendar days of the initial 24-hour report.
  - “10 calendar days” - A complete AdeERS report on the AE must be submitted within 10 calendar days of the investigator learning of the event.
- Any medical event equivalent to CTCAE grade 3, 4, or 5 that precipitates hospitalization (or prolongation of existing hospitalization) must be reported regardless of attribution and designation as expected or unexpected with the exception of any events identified as protocol-specific expedited adverse event reporting exclusions.
- Any event that results in persistent or significant disabilities/incapacities, congenital anomalies, or birth defects must be reported via AdeERS if the event occurs following treatment with an agent under a CTEP IND.
- Use the NCI protocol number and the protocol-specific patient ID assigned during trial registration on all reports.

#### 7.3.4 Protocol-Specific Expedited Adverse Event Reporting Exclusions

- For this protocol only, certain AEs/grades are exceptions to the Expedited Reporting Guidelines and do not require expedited reporting (i.e., AdeERS). The following AEs must be reported through the routine reporting mechanism (Section 7.4):

1

| CTCAE Category                           | Adverse Event                   | Grade | Hospitalization/<br>Prolongation of<br>Hospitalization | Attribution | Comments |
|------------------------------------------|---------------------------------|-------|--------------------------------------------------------|-------------|----------|
| Vascular                                 | Venous thromboembolism          | 3-4   | Regardless                                             |             |          |
| Blood/ bone marrow                       | Neutropenia/febrile neutropenia | 3-4   | Regardless                                             |             |          |
| Gastrointestinal                         | Diarrhea, Nausea, Vomiting      | 3-4   | Regardless                                             |             |          |
| Reproductive system and breast disorders | Irregular menstruation          | 3     | Regardless                                             |             |          |

2

3

#### 7.4 Routine Adverse Event Reporting

4

All Adverse Events must be reported in routine study data submissions. AEs reported through AdEERS must also be reported in routine study data submissions.

5

6

7

8

#### 7.5 Secondary AML/MDS

9

10

11

12

13

14

15

Investigators are required to report cases of secondary AML/MDS occurring on or following treatment on NCI-sponsored chemotherapy protocols using the NCI/CTEP Secondary AML/MDS Report Form. This form can be downloaded from the CTEP web site (<http://ctep.cancer.gov>). Refer to the “CTEP, NCI Guidelines: Adverse Event Reporting Requirements” (available at <http://ctep.cancer.gov>) for additional information about secondary AML/MDS reporting.

16

### 8. PHARMACEUTICAL INFORMATION

17

18

A list of the adverse events and potential risks associated with bevacizumab can be found in Section 7.1.

19

20

21

#### 8.1 Bevacizumab (NSC #704865)

22

23

Other Names. rhuMAb VEGF, Avastin®

24

25

Classification. Recombinant humanized monoclonal antibody

26

27

Molecular Weight. Approximate molecular weight is 149,000 daltons

28

29

Mode of Action. Bevacizumab blocks the binding of vascular endothelial growth factor (VEGF) to its receptors resulting in inhibition of angiogenesis.

30

31

32

Description. Bevacizumab is a recombinant humanized anti-VEGF monoclonal antibody consisting of 93% human and 7% murine amino acid sequences. The agent is composed of human IgG framework and murine antigen-binding complementarity-

33

34

1 determining regions

2  
3 How Supplied. Bevacizumab is supplied as a clear to slightly opalescent, sterile  
4 liquid for parenteral administration. Each 400 mg (25mg/ml – 16 mL fill) glass vial  
5 contains bevacizumab with phosphate, trehalose, polysorbate 20, and Sterile Water  
6 for Injection, USP.

7  
8 Preparation. Vials contain no preservatives and are intended for single use only.  
9 Place the calculated dose in 100 mL of 0.9% sodium chloride for injection.

10  
11 Storage. Upon receipt, refrigerate bevacizumab (2° to 8 ° C). Do not freeze. Do not  
12 shake.

13  
14 Stability. Shelf-life studies of rhuMAb VEGF are ongoing. The sterile single use  
15 vials contain no antibacterial preservatives. Discard vials 8 hours after initial entry.  
16 Once diluted in 0.9% sodium chloride, administer solutions of bevacizumab within 8  
17 hours.

18  
19 Route of Administration. Intravenous

20  
21 Method of Administration. Please see section 5.1.

## 22 23 8.2 Availability

24 Bevacizumab is an investigational agent supplied to investigators by the Division of  
25 Cancer Treatment and Diagnosis (DCTD), NCI. Bevacizumab is provided to the NCI  
26 under a Collaborative Agreement between Genentech and the DCTD, NCI (see  
27 Section 12.3).

## 28 29 8.3 Agent Ordering

30 NCI supplied agents may be requested by the Principal Investigator (or their  
31 authorized designee) at each participating institution. Pharmaceutical Management  
32 Branch (PMB) policy requires that agent be shipped directly to the institution where  
33 the patient is to be treated. PMB does not permit the transfer of agents between  
34 institutions (unless prior approval from PMB is obtained). The CTEP assigned  
35 protocol number must be used for ordering all CTEP supplied investigational agents.  
36 The responsible investigator at each participating institution must be registered with  
37 CTEP, DCTD through an annual submission of FDA form 1572 (Statement of  
38 Investigator), Curriculum Vitae, Supplemental Investigator Data Form (IDF), and  
39 Financial Disclosure Form (FDF). If there are several participating investigators at  
40 one institution, CTEP supplied investigational agents for the study should be ordered  
41 under the name of one lead investigator at that institution.

42  
43 Agent may be requested by completing a Clinical Drug Request (NIH-986) and  
44 mailing it to the Pharmaceutical Management Branch, DCTD, NCI, 9000 Rockville  
45 Pike, EPN Room 7149, Bethesda, MD 20892-7422 or faxing it to (301) 480-4612.  
46 For questions call (301) 496-5725.

## 47 48 8.4 Agent Accountability

1           Agent Inventory Records

2           The investigator, or a responsible party designated by the investigator, must maintain  
3           a careful record of the inventory and disposition of all agents received from DCTD  
4           using the NCI Drug Accountability Record Form (DARF). (See the CTEP home page  
5           at <http://ctep.cancer.gov> for the Procedures for Drug Accountability and Storage and  
6           to obtain a copy of the DARF and Clinical Drug Request form.)  
7

8   9. CORRELATIVE/SPECIAL STUDIES  
9

10    9.1    Laboratory Correlative Studies

11           9.1.1   Markers of Angiogenesis and Tumor Growth

12           Recent development in understanding the molecular basis of cancer has  
13           dramatically advanced the field in cancer drug discovery and development. Now  
14           it is clear that the translation of molecularly targeted cancer therapy into useful  
15           and practical therapeutic approaches is highly complex. The discovery of  
16           mechanism-based biomarkers can facilitate the efficient development of new anti-  
17           cancer medicines and potentially serve as true intermediate or surrogate end point  
18           biomarkers for future clinical trials. Biomarkers can also help guiding rational  
19           selection of therapeutic agents for combination therapy. Two recent studies show  
20           that collagen IV structure was modified after VEGFR2 blockade. These data  
21           together with other data on different biomarkers indicate that it is important to  
22           include measurement on the serum levels of biomarkers in future clinical  
23           practices.  
24

25  
26           To measure numerous biomarkers simultaneously with exceptional sensitivity but  
27           only small amount of plasma proteins, the MSD (Meso Scale Discovery,  
28           Maryland) platform will be used. MSD technology utilizes  
29           electrochemiluminescence detection to detect binding events on patterned arrays.  
30           By customizing the Multi-Array, multiple serum molecules can be tested. We will  
31           collect blood samples from the patients before and during the course of treatment  
32           (see study table). Analysis will be performed for VEGF-A, VEGF-C, sVEGFR1,  
33           sVEGFR2, sVEGFR3, Col IV, SDF1a, IL-1beta, IL-6, IL-8, TNFalpha, G-CSF,  
34           Ang1, Ang2, sTie2, s-cKIT, MMP-1, MMP-2, MMP-3, MMP-9, MMP-10, PIGF,  
35           and bFGF using the Meso-Scale Discovery multiplex array reader and custom  
36           multiplex plates and R&D Systems ELISA kits for collagen IV and SDF1 $\alpha$ . This  
37           assay provides a sensitivity of 0.001 ng/mL and low variability. The level of these  
38           biomarkers during treatment with bevacizumab will be compared to the baseline  
39           level.  
40

41           9.1.2   Circulating endothelial cells

42           Targeting angiogenic vessels requires adequate methods for the assessment of the  
43           biologic effect of various new drugs developed to control cancer progression.  
44           Tumor angiogenesis is evaluated mainly by measuring microvessel density  
45           (MVD) in biopsy specimens using immunohistochemistry. Predicting and/or  
46           assessing accurately the efficacy of anti-angiogenic therapies by this method is  
47           hampered by the heterogeneity of tumors, and by the difficulty to obtain  
48           specimens at multiple time points during treatments. On the other hand, the

1 number of circulating endothelial cells (CECs) – measured by flow cytometry – is  
2 significantly increased in the peripheral blood of untreated lymphoma and breast  
3 cancer patients (104). Furthermore it has been shown that in lymphoma patients  
4 achieving complete remission after chemotherapy, the number of CECs was  
5 reduced to the values observed in healthy controls, and activated CECs were  
6 found to decrease in breast cancer patients evaluated before and after  
7 quadrantectomy.  
8

9 We have recently shown in humans that this method may be used for evaluation  
10 of the early response to VEGF blockade in patients with rectal carcinoma (35).  
11 Specifically, a decrease in both CD31+CD45 and CPC number was noted 3 days  
12 after administration of the VEGF-specific antibody, bevacizumab ( $p < 0.05$ ) but  
13 not on day 12 when given alone, and not when combined with chemoradiation in  
14 rectal carcinoma patients. CEC, CPC and VEGFR2+ monocyte kinetics have been  
15 shown to depend on the type of anti-angiogenic agents and their biomarker value  
16 to be differential (38).  
17

18 There have not been studies of circulating cell biomarkers in patients with  
19 neurofibromatosis and our study will provide the first data in this regard. The  
20 objective of this analysis in the present trial is to assess the kinetics of circulating  
21 endothelial cells (CECs) and progenitor cells prior to and during anti-angiogenic  
22 therapy with bevacizumab.  
23

24 CTC detection/characterization: Blood circulating cells are phenotyped and  
25 enumerated by flow cytometric analyses of CD31, CD34, CD45, and CD133  
26 expression using fluorescence-labeled monoclonal antibodies and a standard  
27 protocol in fresh sample. Fluorescence-labeled isotype-matched nonspecific  
28 immunoglobulin G (IgG) antibodies are used as controls. Flow cytometry is  
29 performed on FACSVantage instruments (Becton Dickinson, San Jose, CA), as  
30 described.  
31

### 32 9.1.3 Collection of Specimen(s)

#### 34 Sample Collection Time Points

35 Blood samples will be obtained for protein analysis of potential biomarkers  
36 for anti-angiogenic therapy 3 hours prior to bevacizumab infusion (i.e., when  
37 baseline labs are drawn) at the following time points:

- 38 • Day 1 prior to initiating therapy
- 39 • Weeks 25 and 49
- 40 • At the off study timepoint

#### 42 Blood collection (needed for each time point sample)

- 44 ○ Collect 30 ml of blood in 3 polypropylene tubes (10 mL in each tube)  
45 containing the anticoagulant EDTA. Tubes should be pre-cooled in an  
46 ice bath.
  - 47 ■ SARSTEDT Monovette<sup>®</sup> EDTA KE (9 ml), Part #  
48 02.1333.001 or

- Becton-Dickinson Vacutainer™ K2E (10 ml), Part # 367525  
or
  - Greiner Bio-One Vacuette® K3E EDTA K3 (9 ml), Part 455036
- Blood tubes must be gently inverted several times after collection to ensure thorough mixing of EDTA with the sample to prevent clotting.
  - Cool all tubes in an ice bath immediately after collection.
  - Glass tubes MUST NOT be used as they may break during transport and freeze-thaw cycles.
- Heparin must not be used as an anticoagulant as it may interfere with downstream genotyping methodology.

#### 9.1.4 Handling of Specimens(s)

##### 9.1.4.1 Angiogenesis and Tumor Growth

Centrifuge two of the three tubes collected at 700 G for 20 minutes at 4C° with no breaks within 30 minutes of collection.

Prepare two red labels (for plasma) each printed with Study-No., patient ID, initials and day/time of sample collection (24-hour clock format, i.e., 6:30 pm = 18:30). Alternatively, red screw caps can be used to color code the vials. A label example is provided below:

|                                |                                          |
|--------------------------------|------------------------------------------|
| Study-No.:                     | Investigator:                            |
| Patient-ID:                    | Patient Initials:                        |
| Date of sampling: (mm/dd/yy)   | Time of Sampling: (hh:mm) (24-hr format) |
| Sample Type: (Serum or Plasma) |                                          |

- Plasma is pipetted in 1 ml aliquots into two red-labeled Nalgene cryovials.
- Clearly label tubes as “plasma” and store at -80°C.
- When samples from all time-points have been collected (after the patient goes off trial) the plasma samples should be shipped to the Steele Laboratory at Massachusetts General Hospital on DRY ICE in a Styrofoam box (Thermo Safe shippers, Fisher Scientific, cat# :11-676-14; 12/case; \$122.30). If a deep freezer is not available on site, the plasma sample should be kept and shipped on dry ice on the same day.

##### 1.1.1.2 Handling of Specimen(s) for Circulating Endothelial Cells

The remaining tube of blood should be wrapped in bubble wrap (from Staples or any other supply store) twice, secured with tape, and placed ON TOP of 2 frozen COLD PACKS (ThermoSafe Polar packs bricks, from Fisher Scientific, cat# 03-530-010, 72 for \$46.25) in a Styrofoam



1 box (Thermo Safe shippers, Fisher Scientific). This sample will be  
2 shipped on the same day that it is collected. DO NOT STORE.

3  
4 9.1.5 Shipping and Analysis of Specimen(s)

5  
6 Ship all specimens to the following address. Be aware that packaging specifics  
7 are different for each test; be certain to package blood and plasma samples  
8 correctly when shipping:

9  
10 Ms. Sylvie Roberge or Christina Koppel  
11 100 Blossom St.  
12 MGH, Cox-734  
13 Boston, MA 02114  
14 Tel. (617) 724-1353  
15 Fax (617) 724-5841  
16 Pager 14082 (617-726-2000)

17  
18 All analysis will be performed within the Steele Laboratory under the direction of Dr.  
19 Dan Duda. The Steele Laboratory has 4 years experience in analyzing and  
20 understanding variation in circulating angiogenic markers in various clinical trials  
21 (34-36).

22  
23 9.2 Special Studies

24  
25 Studies to Evaluate Children (12 through 17 years) for Hypertension and Bony  
26 Toxicity

27 Physical examination including documentation of blood pressure, height, and weight  
28 (Section 10).

29  
30 Blood pressure. Blood pressure will be recorded as the average of 2 measurements  
31 separated by at least 2 minutes. If the second value is more than 5 mmHg different  
32 from the first, continued measurements should be made every 2 minutes until a stable  
33 value is attained. The recorded value should be the average of the last two  
34 measurements obtained. Blood pressure is to be measured preferably in the right arm  
35 with an appropriate sized cuff, taken in a seated position after 3 minutes of rest.  
36 Oscillometric blood pressure measurements that exceed the 95<sup>th</sup> percentile should be  
37 confirmed by auscultation (Appendix F).

38  
39 Height. The patients should take off shoes and socks and heels should be placed  
40 against the wall with ankles together. Height should be measured in a standing  
41 position with a stadiometer. Two additional repeat measurements must be made with  
42 the patient stepping off the stadiometer in between each measurement. Height  
43 measurements should be taken at approximately the same time of day for each visit.  
44 The average of the 3 measurements must be plotted on a standardized growth chart.

45  
46 Evaluation for bone toxicity.

- 47  
48 ○ Growth measurements: 1) Height (as described above)

- 1           ○ Lower extremity scanogram (bilateral hip and lower extremity plain x-rays for leg
- 2           length discrepancy, femur length measurement, and growth plate assessment).
- 3           ○ Unilateral Knee MRI (Appendix F): The knee MRI will only be required for
- 4           patients with open growth plates on scanogram. The imaging protocol is outlined
- 5           in Appendix F. No IV contrast will be used for the knee MRI studies. The knee
- 6           MRI will be done at the same time of the radiographic evaluation for disease and
- 7           will add less than 0.5 hour of scan time.
- 8           ○ Serum calcium, phosphorus, bone specific alkaline phosphatase, osteocalcin,
- 9           PTH, and vitamin D levels (1, 25-dihydroxy and 25-hydroxy).
- 10          ○ Dual-energy X-ray absorptionmetry (DEXA) for bone mineral density
- 11          quantification of lumbar spine and total body.

12  
13 Blood pressure, height, and evaluations for bony toxicity will be performed prior to treatment  
14 with bevacizumab, and during treatment as described in Section 10 (Study Calendar).

15

1  
2 10. STUDY CALENDAR Pre-study evaluations are to be conducted within 28 days prior to  
3 administration of protocol therapy.

|                                      | Pre-Study      | Wk 1           | Wk 4 | Wk 7 | Wk 10 | Wk 13 | Wk 16 | Wk 19 | Wk 22 | Wk 25          | Wk 28 | Wk 31 | Wk 34 | Wk 37 | Wk 40 | Wk 43 | Wk 46 | Wk 49 | Wk 60          | Off-Study <sup>i</sup> |
|--------------------------------------|----------------|----------------|------|------|-------|-------|-------|-------|-------|----------------|-------|-------|-------|-------|-------|-------|-------|-------|----------------|------------------------|
| Bevacizumab <sup>a</sup>             |                | X              | X    | X    | X     | X     | X     | X     | X     | X              | X     | X     | X     | X     | X     | X     | X     |       |                |                        |
| Informed consent                     | X              |                |      |      |       |       |       |       |       |                |       |       |       |       |       |       |       |       |                |                        |
| Eligibility                          | X              |                |      |      |       |       |       |       |       |                |       |       |       |       |       |       |       |       |                |                        |
| Demographics                         | X              |                |      |      |       |       |       |       |       |                |       |       |       |       |       |       |       |       |                |                        |
| Medical history                      | X              |                |      |      |       |       |       |       |       |                |       |       |       |       |       |       |       |       |                |                        |
| Concurrent meds                      |                | X              | X    | X    | X     | X     | X     | X     | X     | X              | X     | X     | X     | X     | X     | X     | X     | X     | X              | X                      |
| Adverse event evaluation             |                | X              | X    | X    | X     | X     | X     | X     | X     | X              | X     | X     | X     | X     | X     | X     | X     | X     | X              | X                      |
| Vital signs                          | X              | X              | X    | X    | X     | X     | X     | X     | X     | X              | X     | X     | X     | X     | X     | X     | X     | X     | X              | X                      |
| Height                               | X              |                |      |      |       |       |       |       |       |                |       |       |       |       |       |       |       |       |                |                        |
| Weight                               | X              |                |      |      |       | X     |       |       |       | X              |       |       |       | X     |       |       |       |       |                |                        |
| Performance status                   | X              |                |      | X    |       | X     |       | X     |       | X              |       | X     |       | X     |       | X     |       | X     |                | X                      |
| CBC with diff, platelets             | X              | X <sup>b</sup> |      | X    |       | X     |       | X     |       | X              |       | X     |       | X     |       | X     |       | X     |                | X                      |
| Coagulation studies (PT/PTT/INR)     | X              |                |      |      |       |       |       |       |       | X              |       |       |       |       |       |       |       | X     |                |                        |
| Serum chemistry <sup>c</sup>         | X              | X <sup>b</sup> |      | X    |       | X     |       | X     |       | X              |       | X     |       | X     |       | X     |       | X     |                | X                      |
| Urinalysis <sup>d</sup>              | X              | X <sup>b</sup> |      | X    |       | X     |       | X     |       | X              |       | X     |       | X     |       | X     |       | X     |                | X                      |
| EKG                                  | X              |                |      |      |       |       |       |       |       | X              |       |       |       |       |       |       |       |       | X              |                        |
| Troponin i                           | X              |                |      |      |       |       |       |       |       | X              |       |       |       |       |       |       |       |       | X              |                        |
| B-HCG <sup>e</sup>                   | X              |                |      |      |       | X     |       |       |       | X              |       |       |       | X     |       |       |       |       |                |                        |
| Brain MRI                            | X <sup>f</sup> |                |      |      |       | X     |       |       |       | X              |       |       |       |       |       |       |       |       | X              | X                      |
| Whole body MRI                       | X              |                |      |      |       |       |       |       |       | X <sup>g</sup> |       |       |       |       |       |       |       |       | X <sup>g</sup> |                        |
| Hearing assessment <sup>h</sup>      | X              |                |      |      |       | X     |       |       |       | X              |       |       |       |       |       |       |       |       | X              | X                      |
| Circulating cells, plasma biomarkers | X              |                |      |      |       |       |       |       |       | X              |       |       |       |       |       |       |       |       | X              | X                      |
| QOL assessments                      | X              |                |      |      |       |       |       |       |       | X              |       |       |       |       |       |       |       |       | X              | X                      |

- a. 7.5mg/kg once every 21 days (-1/+3 days).
- b. Labs do not need to be repeated if the pre-study levels were drawn within 7 days of the first infusion of study drug.
- c. Albumin, alkaline phosphatase, total bilirubin, bicarbonate, BUN, calcium, chloride, creatinine, glucose, potassium, total protein, SGOT[AST], SGPT[ALT], sodium.
- d. For calculation of urine protein. If dipstick  $\geq 2+$  proteinuria, 24-hour urine protein should be obtained.
- e. Serum pregnancy test (for women of child bearing capacity).
- f. Pre-study MRI scans will be performed twice on days -4 (+/- 3 days) and -1 (+/- 1 day) to confirm baseline functional MRI characteristics.
- g. Whole body MRI scans will be repeated at weeks 25 and 49 only if non-vestibular tumors were located on the pre-study scan.
- h. Vestibular function will be evaluated in subjects enrolled at the NCI only (Appendix K).
- i. Patients who have an on-going study agent-related serious adverse event upon study completion or at discontinuation from the study should be contacted by the investigator or his/her designee periodically until the event is resolved or determined to be irreversible.

|                                                                                                                                                                            | Pre-Study | Wk 1 | Wk 4 | Wk 7 | Wk 10 | Wk 13 | Wk 16 | Wk 19 | Wk 22 | Wk 25          | Wk 28 | Wk 31 | Wk 34 | Wk 37 | Wk 40 | Wk 43 | Wk 46 | Wk 49 | Wk 60 | Off-Study <sub>i</sub> |
|----------------------------------------------------------------------------------------------------------------------------------------------------------------------------|-----------|------|------|------|-------|-------|-------|-------|-------|----------------|-------|-------|-------|-------|-------|-------|-------|-------|-------|------------------------|
| Blood pressure <sup>1</sup>                                                                                                                                                |           | X    | X    | X    | X     | X     | X     | X     | X     | X              | X     | X     | X     | X     | X     | X     | X     | X     | X     | X                      |
| Fractionated alkaline phosphatase, bone specific alkaline phosphatase, osteocalcin,, serum calcium, phosphorus, PTH, and vitamin D levels (1, 25-dihydroxy and 25-hydroxy) | X         |      |      |      |       | X     |       |       |       | X              |       |       |       | X     |       |       |       | X     | X     | X                      |
| Scanogram of lower extremity                                                                                                                                               | X         |      |      |      |       |       |       |       |       | X <sup>2</sup> |       |       |       |       |       |       |       |       |       |                        |

|                                                                             |
|-----------------------------------------------------------------------------|
| Additional Evaluations for Hypertension and Bony Toxicity for Children only |
|-----------------------------------------------------------------------------|

|                                                                         |   |  |  |  |  |   |  |  |  |   |  |  |  |   |   |  |   |
|-------------------------------------------------------------------------|---|--|--|--|--|---|--|--|--|---|--|--|--|---|---|--|---|
| MRI of knee for evaluation of tibial/femoral growth plates <sup>3</sup> | X |  |  |  |  | X |  |  |  | X |  |  |  | X |   |  | X |
| DEXA total body and lumbar spine                                        | X |  |  |  |  | X |  |  |  | X |  |  |  | X |   |  | X |
| Height                                                                  | X |  |  |  |  | X |  |  |  | X |  |  |  | X | X |  | X |

<sup>1</sup>Weekly for first 6 weeks. Guidelines for grading and management of hypertension are provided in Appendix F. <sup>2</sup>As clinically indicated. Scanogram will be repeated if there are any gross discrepancies between measurements or difficulty obtaining clinically accurate measurements. Scanograms will be compared to baseline study prior to treatment with bevacizumab.

<sup>3</sup> The knee MRI (Appendix F) will only be required for patients with open growth plates on scanogram.

1 11. MEASUREMENT OF EFFECT

2  
3 Antitumor Effect – Solid Tumors

4 For the purposes of this study, patients should be re-evaluated for response every 3 to 6 months.  
5 Two baseline scans are required for the DCE-MRI to confirm true imaging baseline  
6 characteristics. Thereafter MRIs will be obtained according to the study table.  
7

8 Radiographic response and progression will be evaluated in this study using the criteria proposed  
9 by Widemann and colleagues (29) for neurofibromatosis-associated lesions. Response and  
10 progression will not be evaluated using the Response Evaluation Criteria in Solid Tumors  
11 (RECIST) (105) or by MacDonald Criteria (106) , since they may underestimate progression in  
12 these irregularly shaped tumors. However, linear measurements will be collected as part of the  
13 trial for comparison with volumetric measurements.  
14

15 11.1 Definitions

16  
17 Evaluable for toxicity. All patients will be evaluable for toxicity from the time of  
18 their first treatment with bevacizumab.  
19

20 Evaluable for objective response. Only those patients who have received at least  
21 one cycle of therapy, and have had their disease re-evaluated will be considered  
22 evaluable for response. These patients will have their response classified  
23 according to the definitions stated below. (Note: Patients who exhibit objective  
24 disease progression prior to week 6 will also be considered evaluable.)  
25

26 11.2 Disease Parameters

27  
28 Measurable disease. Measurable lesions are defined as those that can be  
29 accurately measured using volumetric analysis of cranial MRI scans. All study  
30 MRI scans should include standard brain imaging sequences as well as fine cuts  
31 through the internal auditory canal (3 mm slice, no gaps) to image small tumors.  
32 In patients who have had surgery for tumors in the cerebellopontine angle, fat-  
33 saturation should be performed with the post-contrast sequences to compensate  
34 for the possible presence of post-operative fat packing.  
35

36 Note: Tumor lesions that are situated in a previously irradiated area are  
37 considered measurable.  
38

39 Non-measurable disease. Non-measurable lesions include skull-base lesions that  
40 are obscured by artifact from auditory brainstem implants (ABIs) or lesions  
41 whose margins are completely obscured by neighboring tumors (i.e., “collision”  
42 tumors).  
43

44 Target lesions. Investigators will identify a single target lesion in all subjects.  
45 The target lesion in this study is the progressive VS (e.g., the VS associated with  
46 hearing loss) that led to enrollment in the protocol. In cases where subjects have

1 hearing in both ears, the target lesion should be the tumor associated with  
2 progressive decline in hearing in the preceding 24 months leading to word  
3 recognition score < 90% on a 100-word list as administered by an audiologist  
4 associated with this study (enrollment criteria). In rare cases where both VSs are  
5 associated with word recognition < 90% and progressing equally rapidly, the  
6 target lesion should be the larger of the two tumors on imaging.  
7

8 Target lesions should be identified at baseline and measured using volumetric  
9 analysis of the baseline MRI scan. The baseline volumetric MRI scan will be used  
10 as reference for comparison of all future MRI scans to characterize the objective  
11 radiographic tumor response. The baseline word recognition score will be used as  
12 reference for comparison of all future hearing assessments.  
13

14 Non-target lesions. Non-target lesions (when present) in this study include (i)  
15 VSs contralateral to the target lesion , (ii) non-vestibular schwannomas, and (iii)  
16 intracranial meningiomas. Cervicomedullary junction tumors (including  
17 ependymomas) may be included as a non-target lesion if they can be reliably  
18 imaged on cranial MRI scans. The volumes for each of the non-target lesions will  
19 be collected. Additional extracranial tumor burden will be reported based whole  
20 body MRI results.  
21

22 Whole Body MRI. Whole body MRI will be obtained at baseline for all patients.  
23 For patients with measurable spine and peripheral nerve tumors, follow-up whole  
24 body MRI will be obtained according to the study table. This is to explore the  
25 impact of bevacizumab on systemic tumor burden in patients with NF2 and  
26 provide pilot data for possible future clinical trials.  
27

28 Note: Histologic confirmation of tumor type is not required. Designation of tumor  
29 type will be determined by the radiographic appearance by the study radiologist.  
30

### 31 11.3 Methods for Evaluation of Measurable Disease

32 All measurements should be taken and recorded in metric notation [i.e., cubic  
33 centimeters (cm<sup>3</sup>) and in millimeters (or decimal fractions of centimeters)] for  
34 linear measures. All baseline evaluations should be performed as closely as  
35 possible to the beginning of treatment and never more than 8 weeks before the  
36 beginning of the treatment.  
37

38 The same method of assessment and the same technique should be used to  
39 characterize each identified and reported lesion at baseline and during follow-up.  
40

41 Cranial MRI. These studies should be performed according to the description in  
42 Appendix D. Volumetric analysis of MRI scans should be performed on  
43 sequences with fine cuts through the internal auditory canal (3 mm slices, no gap).  
44

### 45 11.4 Response Criteria

1 11.4.1 Hearing Response Parameters

2  
3 Hearing response (Section 11.2 below) will be defined by the change in word  
4 recognition scores, taking as reference the baseline word recognition score  
5 (Appendix C and section 11.2 below). In order to confirm durability of response,  
6 all responses must be maintained through the subsequent evaluation period (3  
7 months) to be considered a true response.

8  
9 Hearing Response (HR): Improvement in word recognition score above the  
10 95% critical threshold, taking as reference the baseline word recognition score  
11 maintained across two sequential evaluation time points (3 months) (Appendix  
12 C).

13  
14 Stable Hearing (SH): Persistence of word recognition score within the 95%  
15 critical threshold, taking as reference the baseline word recognition score  
16 (Appendix C).

17  
18 Progressive Hearing Loss (PHL): Decline in word recognition score below the  
19 95% critical threshold, taking as reference the baseline word recognition score  
20 (Appendix C). Patients with progressive hearing loss will undergo a confirmatory  
21 evaluation of word recognition one week after the study showing hearing loss to  
22 confirm progression. If progression is not confirmed with the follow-up study,  
23 the patient will stay on study.

24  
25 11.4.2 Radiographic Response Parameters

26  
27 Radiographic response will be defined by the change in tumor volume compared  
28 to baseline, as previously defined in previous studies in NF1 (29) . Since NF2-  
29 related tumors do not undergo spontaneous regression in size, the term “minor  
30 response (MR)” will be applied to lesions that decrease in size but do not qualify  
31 for a radiographic response. In order to confirm durability of response, all  
32 responses must be maintained through the subsequent evaluation period (3  
33 months) to be considered a true response.

34  
35 Radiographic Response (RR): At least a 20% decrease in the volume of the  
36 target lesions, taking as reference the  
37 baseline volume. Confirmed on two  
38 sequential evaluation periods.

39  
40 Minor Response (MR): A decrease of 5% to 20% in the volume of  
41 the target lesion, taking as reference the  
42 baseline volume. Confirmed on two  
43 sequential evaluation periods.

44  
45 Progressive Disease (PD): Either: (1) At least a 20% increase in the  
46 volume of the target lesion, taking as



1 reference the baseline volume, or (2) a  
2 decrease in word recognition score beneath  
3 the 95% critical threshold.

4  
5 Stable Disease (SD): Does not meet criteria for radiographic or  
6 hearing response or for progressive disease.  
7

### 8 1.1.3 Evaluation of Non-Target Lesions 9

10 Radiographic evaluations should be calculated separately for non-target  
11 lesions (contralateral VS, non-vestibular schwannomas, and  
12 meningiomas).  
13

14 Radiographic Response (RR): At least a 20% decrease in the volume of  
15 the identified non- target lesions, taking as  
16 reference the baseline volume. Confirmed  
17 on two sequential evaluation periods.  
18

19 Minor Response (MR): A decrease of 5% to 20% in the volume of  
20 the identified non- target lesions, taking as  
21 reference the baseline volume. Confirmed  
22 on two sequential evaluation periods.  
23

24 Stable Disease (SD): Does not meet criteria for radiographic  
25 response or progressive disease.  
26

27 Progressive Disease (PD): At least a 20% increase in the volume of the  
28 identified non-target lesions, taking as  
29 reference the baseline volume  
30

31 Although a clear progression of “non-target” lesions is rare, the opinion of  
32 the treating physician should prevail in such circumstances. Progression  
33 status should be confirmed at a later time by the review panel (or Principal  
34 Investigator). In addition, if there is radiographic progression of the target  
35 lesion or any non-target lesion that is asymptomatic the patient should  
36 remain on treatment. However, if at any time the treating physician or PI  
37 is concerned that there is symptomatic tumor progression of the target  
38 lesion or any non-target lesions that requires intervention, the patient  
39 should come off study as detailed in section 5.3.  
40

### 41 11.4.4 Evaluation of Best Overall Response 42

43 The best overall response is the best hearing response recorded from the  
44 start of the treatment until disease progression (taking as reference for the  
45 hearing measurements recorded at baseline). The patient's best response  
46 assignment will depend on the achievement of both initial measurement

1 and confirmation criteria (response maintained for a minimum of 3  
2 months).

3  
4 Note: Patients with a global deterioration of health status requiring  
5 discontinuation of treatment without objective evidence of disease  
6 progression at that time should be reported as “symptomatic  
7 deterioration” . Every effort should be made to document the objective  
8 progression even after discontinuation of treatment.  
9

## 10 11.5 Duration of Response

11  
12 Hearing evaluations should be performed for non-target (contralateral) VS if  
13 present and if hearing is present in the ipsilateral ear.

14  
15 Duration of overall response: The duration of overall response is measured from  
16 the time measurement criteria are met for HR and RR until the first date that  
17 progressive disease is objectively documented (taking as reference for progressive  
18 disease the measurements recorded at baseline).  
19

20 Duration of stable disease: Stable disease is measured from the start of the  
21 treatment until the criteria for progression are met, taking as reference the  
22 measurements recorded at baseline.  
23

## 24 25 12. DATA REPORTING / REGULATORY CONSIDERATIONS

26  
27 Adverse event lists, guidelines, and instructions for AE reporting can be found in Section  
28 7.0 (Adverse Events: List and Reporting Requirements).  
29

### 30 12.1 Data Reporting

#### 31 32 12.1.1 Method

33  
34 This study will be monitored by the Clinical Data Update System (CDUS) version  
35 3.0. Cumulative CDUS data will be submitted quarterly to CTEP by electronic  
36 means. Reports are due January 31, April 30, July 31, and October 31.

37 Instructions for submitting data using the CDUS can be found on the CTEP web  
38 site (<http://ctep.cancer.gov>). Note: All adverse events that have occurred on the  
39 study, including those reported through AdeERS, must be reported via CDUS.  
40

#### 41 1.1.2 Responsibility for Submissions

42  
43 Study participants are responsible for submitting CDUS data and/or data forms to  
44 the Coordinating Center quarterly by April 30 (Q1 data), July 31 (Q2 data),  
45 October 31 (Q3 data), and Jan 31 (Q4 data) to allow time for Coordinating Center  
46 compilation, Principal Investigator review, and timely submission to CTEP (see

1 Section 12.1.1.). For trials monitored by CTMS, the monthly data submission to  
2 CTEP from Theradex should be copied to the Coordinating Center.  
3

4 The Coordinating Center is responsible for compiling and submitting CDUS data  
5 to CTEP for all participants and for providing the data to the Principal  
6 Investigator for review.  
7

## 8 12.2 CTEP Multicenter Guidelines

9 This protocol will adhere to the policies and requirements of the CTEP Multicenter  
10 Guidelines (presented in Appendix B). Specifically:  
11

- 12 •Dr. Jaishri Blakeley will be the single liaison with the CTEP Protocol and Information  
13 Office (PIO). She is responsible for the coordination, development, submission, and  
14 approval of the protocol as well as its subsequent amendments. She will oversee any  
15 revisions or modifications to the protocol with input from her co-investigators, but  
16 she will take sole responsibility for ensuring that any revision are submitted to the  
17 PIO office and approved before they are activated. She will also assure that all  
18 participating institutions are using the most updated and correct version of the  
19 protocol.
- 20 · Dr. Blakeley and the Johns Hopkins Comprehensive Neurofibromatosis Center are  
21 responsible for the review of all IND Action Letters or Safety Reports received from  
22 CTEP and the quarterly distribution of a summary of these documents to all  
23 participating institutions for submission to their individual IRBs for action as  
24 required. These will be sent as digital files via active email accounts to Drs. Plotkin  
25 and Widemann. Similarly, Dr. Blakeley will be responsible for the timely review and  
26 submission of data for study analysis and the timely review of Adverse Events (AE)  
27 to assure safety of the patients.  
28
- 29 · Dr. Blakeley the Johns Hopkins Comprehensive Neurofibromatosis Center are  
30 responsible for the overall conduct of the study at all participating institutions and for  
31 monitoring its progress. All reporting requirements to CTEP are the responsibility of  
32 Dr. Blakeley.  
33
- 34 · Each participating institution will order DCTD-supplied agents directly from CTEP.  
35 Agents may be ordered by a participating site only after the initial IRB approval for  
36 the site has been forwarded by Amanda Bergner at Johns Hopkins to the CTEP PIO  
37 ([PIO@ctep.nci.nih.gov](mailto:PIO@ctep.nci.nih.gov))  
38

39 The Johns Hopkins Comprehensive Neurofibromatosis Center (JHCNFC) will ensure  
40 that:  
41

- 42 •Each participating institution has an appropriate assurance on file with the Office for  
43 Human Research Protection (OHRP) of the NIH. The JHCNFC will maintain this  
44 documentation as well as copies of IRB approvals from each participating site and  
45 will ensure that an OHRP form 310 (documentation of IRB approval) is submitted to  
46 the CTEP PIO prior to the activation of the protocol (and the first patient registration)

1 at each participating institution.

- 2 •The JHCNFC will also be responsible for central patient registration.
- 3 •The JHCNFC is responsible for the preparation of all submitted data for review by the
- 4 Dr. Blakeley including AE reports. The participating institutions (MGH, JHH, NIH)
- 5 will report all AEs to the JHCNFC and the JHCNFC will submit the AE reports to
- 6 DR. Blakeley and CTEP for timely review.
- 7 · The JHCNFC will conduct periodic audits via review of source documents and
- 8 research records for selected patients brought from participating sites to JHCNFC.
- 9 The JHCNFC will in turn be responsible for organizing all source documents,
- 10 research records, IRB approval documents, NCI Drug Accountability Record forms,
- 11 patient registration lists, response assessments scans and reports, etc. for the audit.
- 12 · The JHCNFC will design and maintain common format data collection forms (Case
- 13 Report Forms that will be submitted to the JHCNFC within 1 month of the time point
- 14 at which they were collected.

### 15 16 12.3 Cooperative Research and Development Agreement (CRADA)/Clinical Trials 17 Agreement (CTA)

18  
19 The agent supplied by CTEP, DCTD, NCI used in this protocol is provided to the  
20 NCI under a Collaborative Agreement (CRADA, CTA, CSA) between the  
21 Pharmaceutical Company(ies) (hereinafter referred to as A Collaborator(s)@) and the  
22 NCI Division of Cancer Treatment and Diagnosis. Therefore, the following  
23 obligations/guidelines, in addition to the provisions in the Intellectual Property  
24 Option to Collaborator@ ([http:// ctep.cancer.gov/industry](http://ctep.cancer.gov/industry)) contained within the terms  
25 of award, apply to the use of the Agent(s) in this study:

26  
27 1. Agent(s) may not be used for any purpose outside the scope of this protocol,  
28 nor can Agent(s) be transferred or licensed to any party not participating in the  
29 clinical study. Collaborator(s) data for Agent(s) are confidential and proprietary  
30 to Collaborator(s) and shall be maintained as such by the investigators. The  
31 protocol documents for studies utilizing investigational Agents contain  
32 confidential information and should not be shared or distributed without the  
33 permission of the NCI. If a copy of this protocol is requested by a patient or  
34 patient's family member participating on the study, the individual should sign a  
35 confidentiality agreement. A suitable model agreement can be downloaded from:  
36 <http://ctep.cancer.gov>.

37  
38 2. For a clinical protocol where there is an investigational Agent used in  
39 combination with (an)other investigational Agent(s), each the subject of different  
40 collaborative agreements , the access to and use of data by each Collaborator shall  
41 be as follows (data pertaining to such combination use shall hereinafter be  
42 referred to as "Multi-Party Data.@):

- 43 a. NCI will provide all Collaborators with prior written notice regarding the
- 44 existence and nature of any agreements governing their collaboration with
- 45 NIH, the design of the proposed combination protocol, and the existence of
- 46 any obligations that would tend to restrict NCI's participation in the proposed

1 combination protocol.

- 2
- 3 b. Each Collaborator shall agree to permit use of the Multi-Party Data from the
- 4 clinical trial by any other Collaborator solely to the extent necessary to allow
- 5 said other Collaborator to develop, obtain regulatory approval or
- 6 commercialize its own investigational Agent.
- 7
- 8 c. Any Collaborator having the right to use the Multi-Party Data from these trials
- 9 must agree in writing prior to the commencement of the trials that it will use
- 10 the Multi-Party Data solely for development, regulatory approval, and
- 11 commercialization of its own investigational Agent.
- 12

13 3. Clinical Trial Data and Results and Raw Data developed under a Collaborative

14 Agreement will be made available exclusively to Collaborator(s), the NCI, and

15 the FDA, as appropriate and unless additional disclosure is required by law or

16 court order. Additionally, all Clinical Data and Results and Raw Data will be

17 collected, used, and disclosed consistent with all applicable federal statutes and

18 regulations for the protection of human subjects including, if applicable, the

19 Standards for Privacy of Individually Identifiable Health Information set forth in

20 45 C.F.R. Part 164.

21

22 4. When a Collaborator wishes to initiate a data request, the request should first be

23 sent to the NCI, who will then notify the appropriate investigators (Group Chair

24 for Cooperative Group studies, or PI for other studies) of Collaborator's wish to

25 contact them.

26

27 5. Any data provided to Collaborator(s) for Phase 3 studies must be in accordance

28 with the guidelines and policies of the responsible Data Monitoring Committee

29 (DMC), if there is a DMC for this clinical trial.

30

31 6. Any manuscripts reporting the results of this clinical trial must be provided to

32 CTEP by the Group office for Cooperative Group studies or by the principal

33 investigator for non-Cooperative Group studies for immediate delivery to

34 Collaborator(s) for advisory review and comment prior to submission for

35 publication. Collaborator(s) will have 30 days from the date of receipt for review.

36 Collaborator shall have the right to request that publication be delayed for up to

37 an additional 30 days in order to ensure that Collaborator's confidential and

38 proprietary data, in addition to Collaborator(s)'s intellectual property rights, are

39 protected. Copies of abstracts must be provided to CTEP for forwarding to

40 Collaborator(s) for courtesy review as soon as possible and preferably at least

41 three (3) days prior to submission, but in any case, prior to presentation at the

42 meeting or publication in the proceedings. Press releases and other media

43 presentations must also be forwarded to CTEP prior to release. Copies of any

44 manuscript, abstract and/or press release/ media presentation should be sent to:

45

46 Regulatory Affairs Branch, CTEP, DCTD, NCI

Executive Plaza North, Suite 7111  
Bethesda, Maryland 20892  
FAX 301-402-1584  
Email: [anshers@mail.nih.gov](mailto:anshers@mail.nih.gov)

The Regulatory Affairs Branch will then distribute them to Collaborator(s). No publication, manuscript or other form of public disclosure shall contain any of Collaborator's confidential/ proprietary information.

### 13. STATISTICAL CONSIDERATIONS

#### 13.1 Study Design/Endpoints

Profound hearing loss and lack of effective medical treatment lead to NF2 patients with severe hearing impairment. One study was reported in treating 10 NF2 patients with bevacizumab on a compassionate-use base. There were 4 out of 7 evaluable patients had hearing response after the treatment (57%, 95% CI: 18-90%) (6).

This is a multi-institution, single-arm, open label phase II trial to formally assess and estimate proportion of objective hearing response in NF2 patients with symptomatic vestibular schwannomas (VS) and progressive hearing loss treated by bevacizumab.

The primary endpoint is hearing response. It is defined as increased word recognition score above the 95% critical threshold that is maintained across two sequential evaluation time points (3 months) compared to baseline word recognition score as reference (Appendix C).

Based on the international Natural History of NF2 Study (35) the proportion of patients with spontaneous tumor regression is < 1%. Patients enrolled on this trial will be eligible only if they have progressive hearing loss (as measured by a decrease in word recognition score) related to VS (i.e., not due to prior interventions such as surgery or radiation) documented in the preceding 24 months with a word recognition score of <85% in the target ear. There is no expected hearing response without a treatment.

Using a one-stage design and assuming a null response rate of 0.05, a total of 14 patients will yield above 90% power to detect an alternative response rate of 0.5 at alpha level of 0.05 to be statistically significant.

Precision for potential point estimation under various response rates are tabulated below:

| Number of Patients | Number Response | Percent Response | 95% CI |
|--------------------|-----------------|------------------|--------|
| 14                 | 3               | 21               | 5-50%  |
| 14                 | 5               | 36               | 13-65% |

|    |    |    |        |
|----|----|----|--------|
| 14 | 8  | 57 | 29-82% |
| 14 | 11 | 79 | 49-95% |

1  
2  
3  
4  
5  
6  
7  
8  
9  
10  
11  
12  
13  
14  
15  
16  
17  
18  
19  
20  
21  
22  
23  
24  
25  
26  
27  
28  
29  
30  
31  
32  
33  
34  
35  
36  
37  
38  
39  
40  
41  
42  
43

Possible outcome are: hearing response, stable hearing, and progressive hearing loss (Response criteria, section 11.4, page 55).

Proportion of hearing response will be estimated using binomial distribution (exact method) along with 95% confidence interval. The duration of the response will be summarized as mean and confidence interval of the mean.

### 13.2 Accrual/Patient Replacement

A predicted accrual rate is 2 subjects per month for 7 months. Patients who did not finish the first cycle of the treatment due to reasons other than toxicity or patients who are unevaluable will be replaced to ensure a total of 14 patients are evaluated on this trial.

### 13.3 Analysis of Secondary Objectives

- To assess the safety and tolerability of bevacizumab in this patient population on an every three week dosing schedule of 7.5mg/kg for 12 months of therapy; the toxicities of bevacizumab have been well studied and described in treating different types of solid tumors including brain tumors. There is only one report from a study in NF2 patients using the same dosage in this trial which no grade 3 or 4 adverse events were reported. The proportion of patients with serious or life threatening toxicities will be estimated along with 95% confidence intervals.
- To assess the rate of radiographic response defined by the change in tumor volume compared to baseline ( $\geq 20\%$  reduction in volume, section 11.4.2); the proportion of radiographic response will be estimated using binomial distribution. The duration of the response will be summarized as mean and confidence interval of the mean.
- To assess growth rate of VS using volumetric MRI through the 18 month trial period. Six measurements of tumor volume per patient will be obtained including two at the baseline (to ensure reproducibility of the DCE-MRI parameters pre-treatment). The rate of change over 12 months will be estimated using generalized linear model.
- To assess changes in function of the auditory system during bevacizumab treatment, A 12 dB change in 4-frequency Pure Tone Average will be considered clinically significant. A change in BAER peak latency for Waves I and V greater than 0.5 ms will be considered clinically significant. The primary DPOAE measurement will be treated non-parametrically (present or absent across time) DPOAE's will be considered present at the frequency of F2 when the distortion product is 6dB above the noise floor. Variables will be analyzed for differences

1 using t-tests if the effects and sample sizes warrant, but this may not be advisable  
2 given the small numbers to be accrued.

- 3
- 4 · To explore imaging of vascular permeability (Ktrans), relative cerebral blood  
5 volume/flow, mean transit time, and mean vessel diameter from perfusion-  
6 weighted MRI. Due to the small number of patients in the study, statistical  
7 analyses for research MRI data will be exploratory in nature, aiming to assess the  
8 performance of various vascular MRI measures as a potential predictor of  
9 response to therapy. As outlined in the protocol, research MRI scans will be  
10 performed at baseline (T0 at day -4 and -1), week 12, 24, 48 and week 72 (off  
11 study). The changes in imaging parameters from T0 will be assessed at each time  
12 point. The correlations between imaging parameters and hearing response will  
13 then be estimated based on the estimated changes. Generalized Estimating  
14 Equations (GEE) will be used to estimate association of imaging parameters in  
15 hearing responses after treatment. The greatest on-treatment change from the  
16 pretreatment baseline value during the course of the study will be computed for  
17 each subject. Statistical comparisons between MRI parameters measured on  
18 different study time point will be performed with a two-tailed paired exact  
19 Wilcoxon test as previously reported (19).
  - 20
  - 21 · To explore biological effects blood samples from patients will be collected before  
22 and during the course of treatment to measure levels of circulating endothelial  
23 cells (CECs), circulating progenitor cells (CPCs), and plasma proteins (VEGF-A,  
24 VEGF-C, sVEGFR1, sVEGFR2, sVEGFR3, Col IV, SDF1a, IL-1beta, IL-6, IL-  
25 8, TNFalpha, G-CSF, Ang1, Ang2, sTie2, s-cKIT, MMP-1, MMP-2, MMP-3,  
26 MMP-9, MMP-10, PIGF, and bFGF ). Changes in the serum markers during  
27 treatment from baseline – during and after treatment – will be summarized using  
28 descriptive statistics. Statistical graphics such as boxplots will be used to present  
29 the summary statistics at each time point. The differences before and during  
30 treatment will be tested using paired statistics. Logistic regression model will be  
31 used to explore associations between changes of serum biomarker levels and  
32 hearing response.
  - 33
  - 34 · The study will explore whether the treatment could improve the quality of the life  
35 of NF2 patients. Three instruments will be used in this study including the Health  
36 Survey Short Form-36 (SF-36), Speech and Spatial Qualities questionnaire  
37 (SSQ), and Tinnitus Reaction Questionnaire (TRQ). Each instrument includes  
38 multiple domains and items. They will be implemented 4 times through the trial  
39 (baseline, 6 months, 12 months and off study (18 months). Standard scoring  
40 manuals will be used to summarize the each item or domains. A overall score at  
41 each time point will be compared with the baseline score two-tailed pared t-test  
42 will be used to assess the change form the baseline and MANOVA could be used  
43 to assess the association between the quality of life and the change of the hearing  
44 score. Each item or domain will be summarized using descriptive statistics.  
45 Questionnaires will be scored as recommended in the user manual for the



1 instrument. Comparisons of on-treatment and post-treatment values with the pre-  
2 treatment baseline value will be performed using paired t-tests.

3  
4 13.4 Safety Monitoring

5 Special attention will be paid to patients 12-17 years for the following measures:

6  
7 Confirmed >6% bone mineral density decrease relative to baseline and who have a  
8 BMD Z score <-2.5 will stop bevacizumab due to toxicity and this will be considered  
9 a DLT. Please see Appendix F for details.

10  
11 It is anticipated that roughly 3-5 of the 14 patients enrolled on protocol will be <18  
12 years old. If the trial has one patient aged 12-17 years old enrolled who develops  
13 grade 3 or 4 toxicities of any type requiring them to stop bevacizumab including the  
14 bone toxicity reported above, bleeding, thrombosis and all other potential toxicities at  
15 any point, the trial will stop enrollment for anyone <18 years old. These toxicities will  
16 be considered dose limiting. HTN in children will be addressed as per the algorithm  
17 in Appendix F.

18  
19 In general, we expect a <30% dose limiting toxicity (DLT) rate across all patients.  
20 The safety of the treatment will be monitored continuously throughout the cohort  
21 using the Bayesian stopping rule at patient number 5, 8, 11 and 14. We assume  
22 approximately a 20% of patients will experience a DLT. The probability of a patient  
23 experiencing DLT was assumed to follow a binomial distribution. Given the planned  
24 sample size of 14, a stopping boundary would be reached if the proportion of the  
25 patients experiencing DLT exceeds the proportion with posterior probability at 0.9. A  
26 recommendation to redefine the safe dose and a safety review by the institution  
27 DSMC will be implemented if 3 or more out of 5, 4 or more out of 8, 5 or more out of  
28 11, and 7 or more out of 14 patients experience a DLT. The probability of meeting the  
29 stopping boundary is 0.02 under the null of a 20% DLT rate. As above 1 patient aged  
30 12-17 years old enrolled who develops grade 3 or 4 toxicities of any type requiring  
31 them to stop bevacizumab, will result in the halting of accrual of additional patients  
32 <18 years old.

1  
2  
3  
4

APPENDIX A: Performance Status Criteria

**ADULTS**

| ECOG Performance Status Scale |                                                                                                                                                                                       | Karnofsky Performance Scale |                                                                                |
|-------------------------------|---------------------------------------------------------------------------------------------------------------------------------------------------------------------------------------|-----------------------------|--------------------------------------------------------------------------------|
| Grade                         | Descriptions                                                                                                                                                                          | Percent                     | Description                                                                    |
| 0                             | Normal activity. Fully active, able to carry on all pre-disease performance without restriction.                                                                                      | 100                         | Normal, no complaints, no evidence of disease.                                 |
|                               |                                                                                                                                                                                       | 90                          | Able to carry on normal activity; minor signs or symptoms of disease.          |
| 1                             | Symptoms, but ambulatory. Restricted in physically strenuous activity, but ambulatory and able to carry out work of a light or sedentary nature (e.g., light housework, office work). | 80                          | Normal activity with effort; some signs or symptoms of disease.                |
|                               |                                                                                                                                                                                       | 70                          | Cares for self, unable to carry on normal activity or to do active work.       |
| 2                             | In bed <50% of the time. Ambulatory and capable of all self-care, but unable to carry out any work activities. Up and about more than 50% of waking hours.                            | 60                          | Requires occasional assistance, but is able to care for most of his/her needs. |
|                               |                                                                                                                                                                                       | 50                          | Requires considerable assistance and frequent medical care.                    |
| 3                             | In bed >50% of the time. Capable of only limited self-care, confined to bed or chair more than 50% of waking hours.                                                                   | 40                          | Disabled, requires special care and assistance.                                |
|                               |                                                                                                                                                                                       | 30                          | Severely disabled, hospitalization indicated. Death not imminent.              |
| 4                             | 100% bedridden. Completely disabled. Cannot carry on any self-care. Totally confined to bed or chair.                                                                                 | 20                          | Very sick, hospitalization indicated. Death not imminent.                      |
|                               |                                                                                                                                                                                       | 10                          | Moribund, fatal processes progressing rapidly.                                 |
| 5                             | Dead.                                                                                                                                                                                 | 0                           | Dead.                                                                          |

5  
6  
7

**CHILDREN**

Lansky Score

|    |     |                                                                                                                 |
|----|-----|-----------------------------------------------------------------------------------------------------------------|
| 10 | 100 | fully active, normal                                                                                            |
| 11 | 90  | minor restrictions in strenuous physical activity                                                               |
| 12 | 80  | active, but tired more quickly                                                                                  |
| 13 | 70  | greater restriction of play and less time spent in play activity                                                |
| 14 | 60  | up and around, but active play minimal; keeps busy by being involved in quieter activities                      |
| 15 | 50  | lying around much of the day, but gets dressed; no active playing participates in all quiet play and activities |
| 16 |     |                                                                                                                 |
| 17 |     |                                                                                                                 |

|   |    |                                                                     |
|---|----|---------------------------------------------------------------------|
| 1 | 40 | mainly in bed; participates in quiet activities                     |
| 2 | 30 | bedbound; needing assistance even for quiet play                    |
| 3 | 20 | sleeping often; play entirely limited to very passive activities 10 |
| 4 | 10 | doesn't play; does not get out of bed                               |
| 5 | 0  | unresponsive                                                        |

1  
2  
3 APPENDIX B: CTEP Multicenter Guidelines  
4

5 If an institution wishes to collaborate with other participating institutions in performing a  
6 CTEP sponsored research protocol, then the following guidelines must be followed.  
7

8 Responsibility of the Protocol Chair

- 9
- 10 • The Protocol Chair will be the single liaison with the CTEP Protocol and Information  
11 Office (PIO). The Protocol Chair is responsible for the coordination, development,  
12 submission, and approval of the protocol as well as its subsequent amendments. The  
13 protocol must not be rewritten or modified by anyone other than the Protocol Chair.  
14 There will be only one version of the protocol, and each participating institution will use  
15 that document. The Protocol Chair is responsible for assuring that all participating  
16 institutions are using the correct version of the protocol.
  - 17 • The Protocol Chair is responsible for the overall conduct of the study at all participating  
18 institutions and for monitoring its progress. All reporting requirements to CTEP are the  
19 responsibility of the Protocol Chair.
  - 20 • The Protocol Chair is responsible for the timely review of Adverse Events (AE) to assure  
21 safety of the patients.
  - 22 • The Protocol Chair will be responsible for the review of and timely submission of data  
23 for study analysis.

24 Responsibilities of the Coordinating Center

- 25
- 26 • Each participating institution will have an appropriate assurance on file with the Office  
27 for Human Research Protection (OHRP), NIH. The Coordinating Center is responsible  
28 for assuring that each participating institution has an OHRP assurance and must maintain  
29 copies of IRB approvals from each participating site.
  - 30 • Prior to the activation of the protocol at each participating institution, an OHRP form  
31 310 (documentation of IRB approval) must be submitted to the CTEP PIO.
  - 32 • The Coordinating Center is responsible for central patient registration. The Coordinating  
33 Center is responsible for assuring that IRB approval has been obtained at each  
34 participating site prior to the first patient registration from that site.
  - 35 • The Coordinating Center is responsible for the preparation of all submitted data for  
36 review by the Protocol Chair.
  - 37 • The Coordinating Center will maintain documentation of AE reports. There are two  
38 options for AE reporting: (1) participating institutions may report directly to CTEP with a  
39 copy to the Coordinating Center, or (2) participating institutions report to the  
40 Coordinating Center who in turn report to CTEP. The Coordinating Center will submit  
41 AE reports to the Protocol Chair for timely review.
- 42  
43  
44  
45

1  
2  
3  
4  
5  
6  
7  
8  
9  
10  
11  
12  
13  
14  
15  
16  
17  
18  
19  
20  
21  
22  
23  
24  
25  
26  
27  
28  
29  
30  
31  
32  
33  
34  
35  
36  
37

- Audits may be accomplished in one of two ways: (1) source documents and research records for selected patients are brought from participating sites to the Coordinating Center for audit, or (2) selected patient records may be audited on-site at participating sites. If the NCI chooses to have an audit at the Coordinating Center, then the Coordinating Center is responsible for having all source documents, research records, all IRB approval documents, NCI Drug Accountability Record forms, patient registration lists, response assessments scans, x-rays, etc. available for the audit.

Inclusion of Multicenter Guidelines in the Protocol

- The protocol must include the following minimum information:
  - The title page must include the name and address of each participating institution and the name, telephone number and e-mail address of the responsible investigator at each participating institution.
  - The Coordinating Center must be designated on the title page.
  - Central registration of patients is required. The procedures for registration must be stated in the protocol.
  - Data collection forms should be of a common format. Sample forms should be submitted with the protocol. The frequency and timing of data submission forms to the Coordinating Center should be stated.
  - Describe how AEs will be reported from the participating institutions, either directly to CTEP or through the Coordinating Center.
  - Describe how Safety Reports and Action Letters from CTEP will be distributed to participating institutions.

Agent Ordering

- Except in very unusual circumstances, each participating institution will order DCTD-supplied agents directly from CTEP. Agents may be ordered by a participating site only after the initial IRB approval for the site has been forwarded by the Coordinating Center to the CTEP PIO.

1  
2  
3  
4  
5  
6  
7

APPENDIX C: Hearing Response Guidelines

Clinical criteria for definition of hearing response based on a 100-word hearing test. Upper and lower limits for the 95% critical differences for percentage scores are adapted from Thornton (8).

| Clinical Criteria for Definition of Hearing Response<br>Based On a 100-Word Hearing Test |                                |                                        |                                |
|------------------------------------------------------------------------------------------|--------------------------------|----------------------------------------|--------------------------------|
| Baseline Word<br>Recognition Score (%)                                                   | 95% Critical Difference<br>(%) | Baseline Word<br>Recognition Score (%) | 95% Critical Difference<br>(%) |
| 0                                                                                        | 0-3                            | 50                                     | 37-63                          |
| 1                                                                                        | 0-6                            | 51                                     | 38-64                          |
| 2                                                                                        | 0-8                            | 52                                     | 39-65                          |
| 3                                                                                        | 0-9                            | 53                                     | 40-66                          |
| 4                                                                                        | 1-11                           | 54                                     | 41-67                          |
| 5                                                                                        | 1-12                           | 55                                     | 42-68                          |
| 6                                                                                        | 1-14                           | 56                                     | 43-69                          |
| 7                                                                                        | 2-15                           | 57                                     | 44-70                          |
| 8                                                                                        | 2-17                           | 58                                     | 45-71                          |
| 9                                                                                        | 3-18                           | 59                                     | 46-72                          |
| 10                                                                                       | 4-19                           | 60                                     | 47-73                          |
| 11                                                                                       | 4-21                           | 61                                     | 48-74                          |
| 12                                                                                       | 5-22                           | 62                                     | 49-74                          |
| 13                                                                                       | 6-23                           | 63                                     | 50-75                          |
| 14                                                                                       | 6-25                           | 64                                     | 51-76                          |
| 15                                                                                       | 7-26                           | 65                                     | 52-77                          |
| 16                                                                                       | 8-27                           | 66                                     | 53-78                          |
| 17                                                                                       | 8-28                           | 67                                     | 54-79                          |
| 18                                                                                       | 9-29                           | 68                                     | 55-80                          |
| 19                                                                                       | 10-31                          | 69                                     | 56-81                          |
| 20                                                                                       | 11-32                          | 70                                     | 57-81                          |
| 21                                                                                       | 11-33                          | 71                                     | 58-82                          |
| 22                                                                                       | 12-34                          | 72                                     | 59-83                          |
| 23                                                                                       | 13-35                          | 73                                     | 60-84                          |
| 24                                                                                       | 14-36                          | 74                                     | 61-85                          |
| 25                                                                                       | 14-37                          | 75                                     | 63-86                          |
| 26                                                                                       | 15-39                          | 76                                     | 64-86                          |
| 27                                                                                       | 16-40                          | 77                                     | 65-87                          |
| 28                                                                                       | 17-41                          | 78                                     | 66-88                          |
| 29                                                                                       | 18-42                          | 79                                     | 67-89                          |
| 30                                                                                       | 19-43                          | 80                                     | 68-89                          |
| 31                                                                                       | 19-44                          | 81                                     | 69-90                          |
| 32                                                                                       | 20-45                          | 82                                     | 71-91                          |
| 33                                                                                       | 21-46                          | 83                                     | 72-92                          |

|    |       |     |        |
|----|-------|-----|--------|
| 34 | 22-47 | 84  | 73-92  |
| 35 | 23-48 | 85  | 74-93  |
| 36 | 24-49 | 86  | 75-94  |
| 37 | 25-50 | 87  | 77-94  |
| 38 | 26-51 | 88  | 78-95  |
| 39 | 26-52 | 89  | 79-96  |
| 40 | 27-53 | 90  | 81-96  |
| 41 | 28-54 | 91  | 82-97  |
| 42 | 29-55 | 92  | 83-98  |
| 43 | 30-56 | 93  | 85-98  |
| 44 | 31-57 | 94  | 86-99  |
| 45 | 32-58 | 95  | 88-99  |
| 46 | 33-59 | 96  | 89-99  |
| 47 | 34-60 | 97  | 91-100 |
| 48 | 35-61 | 98  | 92-100 |
| 49 | 36-62 | 99  | 94-100 |
|    |       | 100 | 97-100 |

- 1
- 2
- 3
- 4
- 5

1  
2  
3 APPENDIX D: Audiology Procedures  
4

5 A. AUDIOLOGY PERSONNEL

6 The primary source of reliability and validity will be the qualifications of the clinical  
7 audiologists performing the tests, and their adherence to standard practices. These practices  
8 will be specified in this section. Study Audiologists will compile information assuring  
9 standard calibration, installation of reference-calibrated equipment, etc. (107).

10 a. Lead Audiologist

11 Each Clinical Site will designate a Lead Audiologist who will be the contact for  
12 study-related issues with the Senior Study Audiologist. This audiologist will  
13 oversee local audiology operations and also communicate with the site PI and  
14 CRC. The lead audiologist may train other audiologists at the site for testing.

15 b. Qualifications

16 Each evaluation will be performed by a fully qualified audiologist. The precise  
17 definition of qualification can vary from state to state depending on licensure  
18 laws, etc. For the purposes of this study, full qualification is defined as the  
19 highest local level of qualification, certification or licensure. Each of these  
20 requires a Master's Degree (or higher) and completion of a clinical fellowship or  
21 equivalent. Basic requirements for Lead Audiologist will be no different, but only  
22 one audiologist per center will be designated for this duty.

23 c. Training

24 Each site's Lead Audiologist will be responsible for local training of any  
25 audiologist actually testing. This training will be based on this Appendix, and the  
26 Appendix will remain available to all trained audiologists as a resource. The  
27 procedures can be refined and changed to better accommodate the needs of the  
28 local audiologists for precise guidance. All Lead Audiologists will be contacted in  
29 advance of the initiation of participant enrollment at the site, and the Senior Study  
30 Audiologist will discuss and demonstrate the procedures contained in this  
31 Appendix. These will include personnel, test protocols, data cross checking,  
32 procedures for correcting or completing evaluations, and reporting results.

33  
34 B. CONTACTS

35 A system of regular contact between the Senior Study Audiologist and each Lead  
36 Audiologist will be initiated before any participant's enrollment. This will take place  
37 primarily by e-mail, with documents faxed as necessary. As audiologic issues arise, the local  
38 audiologists will be asked to contact the Lead Audiologist, who will act as liaison with the  
39 Senior Study Audiologist. Other local issues are expected to be addressed by contact  
40 between the Clinical Site PIs, their Lead Audiologists, and the CRCs.



## 1 C. AUDIOLOGY TESTING PROTOCOL OVERVIEW

2 Participants will be referred for each evaluation by the Clinical Site's PI or CRC, who will  
3 determine the timing of return visits. When the participant arrives for each test, the  
4 audiologist will greet the participant and accompanying persons and briefly and privately  
5 discuss progress if the participant wishes. If the participant requires language interpretation,  
6 this will be provided in the customary manner in place at each site. Only minimal history  
7 taking (i.e. otalgia) is required of the audiologist, and, as much as possible, study questions  
8 should be referred to the PI or CRC. Audiologists will not be formally blinded to any aspect  
9 of the study, but no effort will be made to specify the participant's status to the audiologist,  
10 and the previous evaluations will not be reviewed in advance.

11 The audiologist will seat the participant in a sound-treated room (108). No more than one  
12 person will be allowed to accompany the participant and this person will not be allowed to  
13 sit in the booth or to be in the line of sight of the participant. As much as possible, light  
14 levels in the participant and the tester sides will be adjusted to provide a good view of the  
15 participant and a poorer view of the audiologist (i.e. participant side bright, tester side dark).  
16 The participant should be seated perpendicular to the audiologist to minimize cues. The  
17 room door will be fully closed. The participant will be asked to respond by hand raise or by  
18 button push, whichever is customary at the Clinical Site.

19 The Lead Audiologist at each site will ensure that threshold tests are performed in the  
20 standard manner (108) . This includes the Hughson-Westlake bracketing procedure (109,  
21 110) . A 200 ms. ON versus 200 ms. OFF duty cycle for tone presentation is recommended  
22 with an opportunity to appreciate 3-4 tones per trial. Narrow band noises or FM modulated  
23 tones will not be substituted for standard pure tones. Thresholds will be transcribed on the  
24 Clinical Site's standard audiogram, using standard symbols (111) At the conclusion of the  
25 evaluation, the audiologist may briefly discuss the result with the participant and  
26 accompanying persons, again referring most study questions to the PI or CRC where  
27 possible. Discussion of helpful strategies and devices as indicated by the case is expected.

28  
29 Word recognition scores: Patients will be presented a list of 50 words at a level determined  
30 to yield the maximum score. NF2 patients may exhibit "rollover" where the score decreases  
31 at a fully audible level so we will do a full 50 word list at the fully audible (high) level, and  
32 one additional 50 word list at a level 10-15dB below that level (the low level). An additional  
33 50 words will be added at the level of the highest score; the total of this list and the list on  
34 which the patient initially scored highest will generate a 100 word list which will be used  
35 and compared across visits. This study will use monosyllable lists and standardized  
36 recordings (CID W-22; QMAS V. I).  
37

## 38 D. AUDIOLOGY DATA FORM

39 The study uses repeated audiologic measures designed to capture changes with treatment and  
40 with time. Therefore, the NF 2 Audiology Data form is designed as a uniform data entry form  
41 for every test. This form will be filled out for each eligibility screening, and for participants at  
42 each designated evaluation point. The NF 2 Audiology Data form will be filled out during or  
43 immediately after each evaluation by the testing audiologist.

1 a. Header Section

2 The top line of the form is devoted to identification of the site, the participant, the  
3 study visit number and the date. The participant's ID number and participant's  
4 initials as used in the study will be made available by the local CRC. The CRC  
5 will also specify the visit #, indicating the progress of each participant through the  
6 study. The date field will be filled out to reflect the date of the evaluation, even if  
7 some items result from a subsequent review.

8 b. Data Section

9 The date field will be filled out to reflect the date of the evaluation, even if some  
10 items result from a subsequent review. The following fields reflect the target ear  
11 data. Word recognition will reflect the results of tests described above and will  
12 always be an integer from 0-100%. Tests where no speech percept was found will  
13 be coded as "0%". PTA4 will reflect the average of the thresholds of the target ear  
14 for 500, 1000, 2000 and 4000 Hz divided by 4. Any threshold where there was no  
15 response at the limits of the audiometer will be coded as being one (5dB)  
16 audiometric step above that level, and entered in to the average. DPOAE will be  
17 recorded as present (Y) vs. not present (N). All items will be entered in the same  
18 manner for the contralateral ear.

19 E. DATA CROSS CHECKS

20 This section will describe data cross check activities performed by the testing audiologist  
21 and the Lead Audiologist, as well as the mechanism for reporting unforeseen problems or  
22 concerns.

23 a. Testing Audiologist

24 The primary data cross checks will be the responsibility of the testing audiologist.  
25 Specifically, equipment and training will be maintained which will allow such  
26 procedures as masking plateau verification, tympanometry, SRT, Stenger's test, etc.  
27 These tests will be applied at the discretion of the testing audiologist to verify  
28 results and to rule out functional or retrocochlear hearing loss. None of these tests  
29 will be used as data, but will be noted on the NF 2 Audiometry Worksheet and  
30 attached to that worksheet.

31 b. Lead Audiologist

32 The testing audiologist will complete the NF 2 Audiology Data form, with the  
33 exception of the section for Lead Audiologist Review and Comments. The form  
34 will then be given to the Lead Audiologist or placed in the file section for data  
35 awaiting review. The Lead Audiologist will verify the audiologic aspects of the  
36 data. The Lead Audiologist will verify validity and completeness, or will contact  
37 the CRC for rescheduling for other testing if necessary. The completed form will  
38 be given to the local CRC for transmission to the Data Management Center.

39 c. Problems and Concerns

40 The Senior Study Audiologist will be responsible for resolution of problems in  
41 audiology data interpretation. If these arise at the office of the PI, they will be  
42 communicated to the Senior Study Audiologist (i.e. not the local Lead Audiologist

1 directly), who will have discretion as to resolution study-wide or site-specific. If  
2 problems arise at an individual site, they will be communicated by the local Lead  
3 Audiologist to the Senior Study Audiologist, who will again be responsible for  
4 resolution either study-wide or site-specific. The anticipated mechanism for  
5 resolution of study-wide issues will be communication with all local Lead  
6 Audiologists and changes or additions to this Appendix. The Senior Study  
7 Audiologist will be responsible for informing and receiving advice and approval  
8 from the Study Chair as appropriate.

## 10 F. EQUIPMENT

11 The following section contains specifications for equipment used in this study.

### 12 a. Sound-treated E nclosure

13 A single- or double-walled sound-treated enclosure that meets American National  
14 Standard Criteria for Maximum Permissible Ambient Noise Levels for Audiometric  
15 Test Rooms shall be used to conduct pure tone air and bone conduction thresholds  
16 and word recognition testing.

17 An illuminated otoscope is used to examine a participant's ear canals. If any  
18 possible contraindications to audiometric testing (such as excess cerumen, eardrum  
19 abnormalities, etc.) are detected, the participant must be referred for medical  
20 evaluation before audiometric testing can proceed.

### 21 b. Acoustic I mmittance E quipment

22 An immittance device that meets the American National Standard Specifications for  
23 Instruments to Measure Aural Acoustic Impedance and Admittance is used to  
24 conduct tympanometry and acoustic reflex threshold testing. Test results will be  
25 printed directly from the immittance device or recorded manually at the conclusion  
26 of testing on each ear. Probe tips must be appropriate in size to seal the  
27 participant's ear canal tightly during tympanometry and acoustic reflex testing.  
28 Clinical centers must have an adequate variety of sizes of probe tips to  
29 accommodate ear canals of varying dimensions.

### 30 c. Audiometer

31 Audiometers that meet the American National Standard Specifications for  
32 Audiometers [1] and have two channels are used to conduct pure tone air and bone  
33 conduction threshold, SRT and word recognition testing. One channel of the  
34 audiometer generates and delivers the test signals, either pure-tones or prerecorded  
35 speech. The second channel delivers narrow-band or speech-band masking noise  
36 simultaneously with the test signal, but to the non-test ear whenever necessary. The  
37 audiometer must have an input jack for external equipment such as a compact disc  
38 player or tape player, which will be used to present speech stimuli for word  
39 recognition testing.

### 40 d. Audiometer T ransducers

41 Earphones mounted in supra-aural cushions and calibrated according to the

1 American National Standard Specification for Audiometers (96) are used to deliver  
2 the test material from the audiometer to the participant. The earphones are  
3 designated as “right” and “left” and will be placed comfortably over the  
4 participant’s right and left ears, respectively. Bone vibrators calibrated according to  
5 the same standards are used to obtain bone conduction thresholds. During the  
6 testing, the bone vibrator is positioned over the mastoid area of the participant’s test  
7 ear, taking care that it is not in contact with the posterior part of the pinna.

8 e. Compact Disc Player

9 A compact disc player must be used to deliver pre-recorded speech material to the  
10 audiometer and subsequently to the transducers positioned over the participant’s  
11 ears. A cable extends between the output jack of the compact disc player and the  
12 input jack of the audiometer.

13 f. Distortion Product Otoacoustic Emissions System

14 There are no standards for DPOAE equipment. Each study site will use their  
15 clinical DPOAE system to accomplish testing as specified in the protocol.

16 g. Maintenance

17 Each clinical center is responsible for the proper operation and maintenance of its  
18 audiometric equipment. Responsibility for proper maintenance is assumed by the  
19 Lead Audiologist, and all staff are instructed to report promptly any real or  
20 suspected equipment problems to that person. All checks, inspections, and repairs  
21 are documented and recorded by date in a permanent log. The Study Chair and  
22 Study Senior Audiologist may review this log at periodic site visits. All study test  
23 equipment including audiometers and acoustic immittance devices must be  
24 calibrated according to the American National Standards Institute. Listening checks  
25 may help to identify problems that could influence participants’ test behavior and  
26 audiometric results in between scheduled physical calibrations. Study audiologists  
27 should perform a listening check on any day when a participant enrolled in the  
28 protocol will be tested.  
29  
30

1  
2  
3 APPENDIX E: MRI Protocols

4  
5 BRAIN MRI

6  
7 Image Acquisition

8 Each patient will be scanned on the same 3 Tesla MRI system. Each scanning session will consist of the  
9 following sequences:

- 10 1) Scout sequence  
11 2) T2-weighted imaging  
12 3) Fluid-attenuated inversion recovery (FLAIR) imaging  
13 4) T1-weighted pre-contrast imaging  
14 5) Blood oxygenation level dependent (BOLD) and arterial spin labeling (ASL) imaging  
15 6) Dynamic contrast-enhanced imaging  
16 7) Diffusion tensor imaging  
17 8) Dynamic susceptibility contrast imaging  
18 9) Post-contrast T1-weighted imaging  
19

20 The post-contrast T1 weighted imaging with fine cuts through the internal auditory canal (3 mm slices, no  
21 skip) and volumetric analysis will be used to assess the endpoint of radiographic response (defined as  $\geq$   
22 20% decrease in tumor volume by MRI scan). The total scan time for the required images for the primary  
23 endpoint is roughly 10 minutes. The remaining sequences will be assessed as secondary corollary  
24 endpoints to evaluate the mechanism by which bevacizumab may affect VS biology. The total scan time  
25 for all sequences is roughly 45 minutes.  
26

27 The details of the imaging sequences to be performed are:

- 28 I. Scout. The “AutoAlign” method of producing scout images is used to improve scan-to-scan  
29 reproducibility. Briefly, this method acquires two low-resolution whole-head scans (2.5 mm isotropic  
30 voxels) at different flip angles within 46 s, and uses a computer algorithm to compare the current  
31 location of the head with a predefined atlas. This localization is then used to ensure that the slice  
32 prescriptions are identical between scan sessions, even across many months (131, 132). Imaging  
33 time: 46 seconds.  
34 II. T2-weighted imaging. A single-slab, three-dimensional, T2- weighted turbo-spin-echo sequence with  
35 high sampling efficiency (“SPACE”) is used at high resolution. Specific imaging parameters: 0.9  
36 mm isotropic, 192 slices,  $256 \times 256$  matrix, 24 cm FOV, TR 3200 ms, effective TE 494 ms. Imaging  
37 time: 4:30 (min:sec).  
38 III. Fluid-attenuated inversion recovery (FLAIR) imaging. Axial FLAIR images are acquired with TR  
39 10,000 ms, TE 70 ms, and 5 mm slice thickness, 1 mm interslice gap, and  $0.6 \text{ mm} \times 0.45 \text{ mm}$  in-  
40 plane resolution; 23 slices,  $384 \times 512$  matrix. Imaging time: 3:02 (min:sec).  
41 · T1-weighted pre-contrast imaging. Axial T1-weighted images are obtained prior to the injection of  
42 contrast. TR 600 ms, TE 12 ms, 5mm slice thickness, 1 mm interslice gap,  $0.6 \text{ mm} \times 0.45 \text{ mm}$  in-  
43 plane resolution; 23 slices,  $384 \times 512$  matrix. Imaging time: 1:59 (min:sec).  
44 IV. Blood oxygenation level dependent (BOLD) and arterial spin labeling (ASL) imaging. This is  
45 performed with the total 10 min sequential supply (the baseline 2 min of room air, 4 min of 100%  
46 pure oxygen, and then 4 min of room air), and BOLD /ASL images are acquired through EPI readout.  
47 Voxel size:  $3.4 \times 3.4 \times 6.0 \text{ mm}$ , TR 2000 ms, TE 19 ms. Delay in TR: 284 ms. Imaging time: 10:06  
48 (min:sec).

- 1 V. Dynamic contrast-enhanced imaging. This is a series of acquisitions of a 50.6 mm thick slab  
2 consisting of 20 slices. All scans are 2.9 mm × 2.0 mm resolution, with a 2.1 mm slice thickness, 0.4  
3 mm interslice gap, using a fast gradient echo technique (TR 5.7 ms, TE 2.73 ms). Data to allow  
4 computation of a T1 map of the tissue of interest are initially created using five different flip angles  
5 (2°, 5°, 10°, 15°, 30°). Then, the same slab of tissue is sampled with a 10 flip angle every 5.04 s for  
6 252 s (50 time points), and 0.05 - 0.1 mmol/kg of Gd-DTPA is injected 52 s after the beginning of the  
7 acquisition at 5 cc/s. Imaging time: 4:12 (min:sec).
- 8 VI. Diffusion tensor imaging. 35 slices of twice-refocused echo-planar diffusion-weighted images are  
9 acquired with TR 4430 ms, TE 87 ms, and a b-value of 700 s/mm<sup>2</sup> in 90 directions as well as 10 low  
10 b-value images (b ~0 s/mm<sup>2</sup>) to allow reconstruction of the diffusion tensor at each voxel. Resolution  
11 is 1.2 mm isotropic, with a 160 × 160 matrix. Imaging time: 7:45 (min:sec).
- 12 VII. Dynamic susceptibility contrast imaging. A 40 mm slab of tissue is imaged using a dual-  
13 echo, combined gradient-echo, and spin-echo echo planar sequence to enable relative vessel size  
14 mapping. This sequence acquires two images after each 90 RF excitation: a gradient echo image (TE  
15 31 ms) and a spin echo image (TE 96 ms); each image had 1.2 mm in-plane resolution and 2 mm  
16 through-plane resolution (160 × 160 matrix). There is a 0 mm interslice gap and 10 slices. 100 blocks  
17 of images are acquired. 0.1 - 0.2 mmol/kg of Gd-DTPA is injected at 5 cc/s after 54 s of imaging.  
18 Imaging time: 2:14 (min:sec).
- 19 VIII. Post-contrast T1-weighted imaging. Axial T1-weighted images are acquired exactly as pre-  
20 contrast, as described above. Moreover, axial and coronal images for internal auditory canal with fat-  
21 suppression are acquired respectively with TR 750 ms, 9.8 ms, and 3 mm slice thickness, 0 mm  
22 interslice gap, and 0.56 mm in-plane resolution; 11 slices, 320 × 320 matrix. Imaging time: 3:56  
23 (min:sec). In addition, a 3D multi-echo magnetization prepared rapid gradient echo (MPRAGE)  
24 volumetric acquisition is performed, with 1 mm isotropic voxels, TR 2530 ms, TE 1.64 ms, 3.5 ms,  
25 5.36 ms, 7.22 ms, 256 × 256 matrix, 176 slices. Imaging time: 6:03 (min:sec).

## 26 27 Image Analysis

- 28 I. Volumetrics. Enhancing lesions will be quantitatively analyzed by an experienced  
29 neuroradiologist blinded to the order of the scans, patient identity and treatment status of the  
30 patients. Bi-dimensional diameters will be created and outlined using electronic calipers in  
31 accordance with the Macdonald criteria. The lesions will also be outlined using a volumetric  
32 approach described previously that includes outlining each enhancing voxel on post-contrast  
33 scans and then summing the voxels to calculate an overall lesion volume. All scans on this trial  
34 will be sent to the laboratory of Dr. Gregory Sorensen at MGH for central analysis of tumor  
35 volume. A report will be generated and then sent to the principal investigators at each study sites  
36 and to the study PI.
- 37 II. Map Synthesis. Blood volume, blood flow, and vessel size maps. Relative cerebral blood volume  
38 of larger vessels (gradient echo images) and smaller vessels (spin echo images) as well as  
39 cerebral blood flow will be calculated using a standard deconvolution technique (133) with blood  
40 volume corrected for leakage of the contrast agent across the blood brain barrier (134). Vessel  
41 size maps will be created using the ratio of delta-R2\* to delta-R2, according to published  
42 approaches (135-137).
- 43 III. Apparent diffusion coefficient (ADC) maps. Maps of ADC will be created from the low and high  
44 b value images using custom-written software implementing the standard Steskjal-Tanner  
45 diffusion approximation.
- 46 IV. Permeability maps. Dynamic contrast enhanced MRI data will be processed using custom-made  
47 software written in Matlab (The MathWorks, Natick, Massachusetts), following standard

1 published approaches, including maps of Ktrans (corresponding roughly to wash-in rates of the  
2 contrast agent) (138) and Ve (extracellular-extravascular volume fraction).

3 V. Simultaneous BOLD and flow maps. Both BOLD and flow response maps to 100% pure oxygen  
4 will be created using Neurolens (MGH, Massachusetts, and Neurovascular Imaging Lab, UNF  
5 Montréal) software. After the processes of motion correction and spatial smoothing, current  
6 oxygen block paradigm is applied to linear modeling process.

7 VI. Synthetic Map Analysis. The tumor will be outlined on the synthesized maps and median values  
8 across the entire lesion will be computed. As all of the values other than ADC will be considered  
9 relative, rather than absolute, maps will be normalized to each other using an unaffected area of  
10 gray and white matter, typically located distantly, such as in the contralateral hemisphere.

## 11 WHOLE BODY MRI

12 A 3-T MR imager with an integrated body coil will be used to acquire whole-body MR images. No  
13 intravenous contrast material is required. The MR unit will be calibrated according to standard  
14 operational procedures for a clinical MR system. No special calibration is required.

15 Each subject will be examined from head to toe in the supine position. The entire body will be examined  
16 with a coronal short inversion time inversion- recovery (STIR) sequence: repetition time msec/echo time  
17 msec/inversion time msec, 4190/111/150; 10-mm section thickness; no intersection gap; 500-mm field of  
18 view; echo train length, 25; 320 240 matrix; and five imaging stations providing craniocaudal coverage  
19 with an overlap of at least 40 mm between two adjacent stations.

20 To optimize consistency between examinations, the initial imaging station will be centered on the  
21 patient's chin, and the initial coronal section will be positioned at the level of the table top.

22 These two steps eliminated the need to perform localizer sequences, reducing imaging time. Total  
23 imaging time for the five STIR sequences is estimated at 15 minutes.

24 Images from the five acquisitions will be saved in the Digital Imaging and Communications in Medicine  
25 format. Images will then be fused into a single whole-body series by using software available on the MR  
26 workstation (for example, Siemens Syngo, version MR B13 4VB13A; Siemens Medical Solutions).

## 27 SENDING IMAGES BETWEEN INSTITUTIONS

28 If images are to be analyzed at a site other than the site obtaining the imaging, all images are to be loaded  
29 onto a disk and labeled with the subject ID number only. Complete the case report form for submitting  
30 images; fax a copy to the Central Study Office, keep the original and include a copy of this form with the  
31 disk. Ship via courier to the address in the protocol that corresponds with the scan that is being shipped.  
32

33

1  
2  
3  
4  
5  
6  
7  
8

APPENDIX F: Grading and management of hypertension and of bony toxicity with volumetric MRI of the growth plates in children 12 through 17 years old.

Grading of hypertension

Diastolic blood pressure levels for BOYS aged 12-17 years

|             | 1                   | 2                         | 3                                | 4                            |
|-------------|---------------------|---------------------------|----------------------------------|------------------------------|
| Age (years) | ULN*<br>DBP<br>mmHg | DBP ≤10 mmHg<br>above ULN | DBP >10 or ≤25<br>mmHg above ULN | DBP >25<br>mmHg above<br>ULN |
| 12          | 80                  | 81-90                     | 91-105                           | 106                          |
| 13          | 82                  | 83-92                     | 93-107                           | 108                          |
| 14          | 83                  | 84-93                     | 94-108                           | 109                          |
| 15          | 83                  | 84-93                     | 94-108                           | 109                          |
| 16          | 84                  | 85-94                     | 95-109                           | 110                          |
| 17          | 84                  | 85-94                     | 95-109                           | 110                          |

9  
10  
11  
12  
13  
14

\* ≤95<sup>th</sup> percentile for age and 50% height percentile

Diastolic blood pressure levels for GIRLS aged 12-17 years

|             | 1                   | 2                         | 3                                | 4                            |
|-------------|---------------------|---------------------------|----------------------------------|------------------------------|
| Age (years) | ULN*<br>DBP<br>mmHg | DBP ≤10 mmHg<br>above ULN | DBP >10 or ≤25<br>mmHg above ULN | DBP >25<br>mmHg above<br>ULN |
| 12          | 81                  | 82-91                     | 92-106                           | 107                          |
| 13          | 82                  | 83-92                     | 93-107                           | 108                          |
| 14          | 82                  | 83-92                     | 93-107                           | 108                          |
| 15          | 83                  | 84-93                     | 94-108                           | 109                          |
| 16          | 85                  | 86-95                     | 96-110                           | 111                          |
| 17          | 87                  | 88-97                     | 98-112                           | 113                          |

15  
16  
17  
18  
19  
20

\* ≤95<sup>th</sup> percentile for age and 50% height percentile

These Charts list DBP levels within the ULN (1), within 10 mmHg above the ULN (2), within



1 11-25 mmHg above the ULN (3), and >25 mmHg above the ULN (4).

2 Instructions for using this BP Chart:

- 3 1. Measure the patient's blood pressure using an appropriate size cuff.
- 4 2. Select appropriate chart for a female or male patient. Age should be rounded to the
- 5 nearest year.
- 6 3. Using the "age" row determine if the DBP is within the ULN (1) or elevated (2, 3, 4).
- 7 4. See Section 6 for definition of dose limiting hypertension.

8

### 9 Management of Bevacizumab related Hypertension

10

11 The algorithm outline below will be used to grade and manage bevacizumab-related  
12 hypertension. A diastolic blood pressure (DBP) equal to the 95<sup>th</sup> % for age and gender will be  
13 defined as the upper limit of normal (ULN).

14

15 Patients with elevated DBP at any time should have blood pressure measurements performed  
16 twice weekly until DBP is within the ULN.

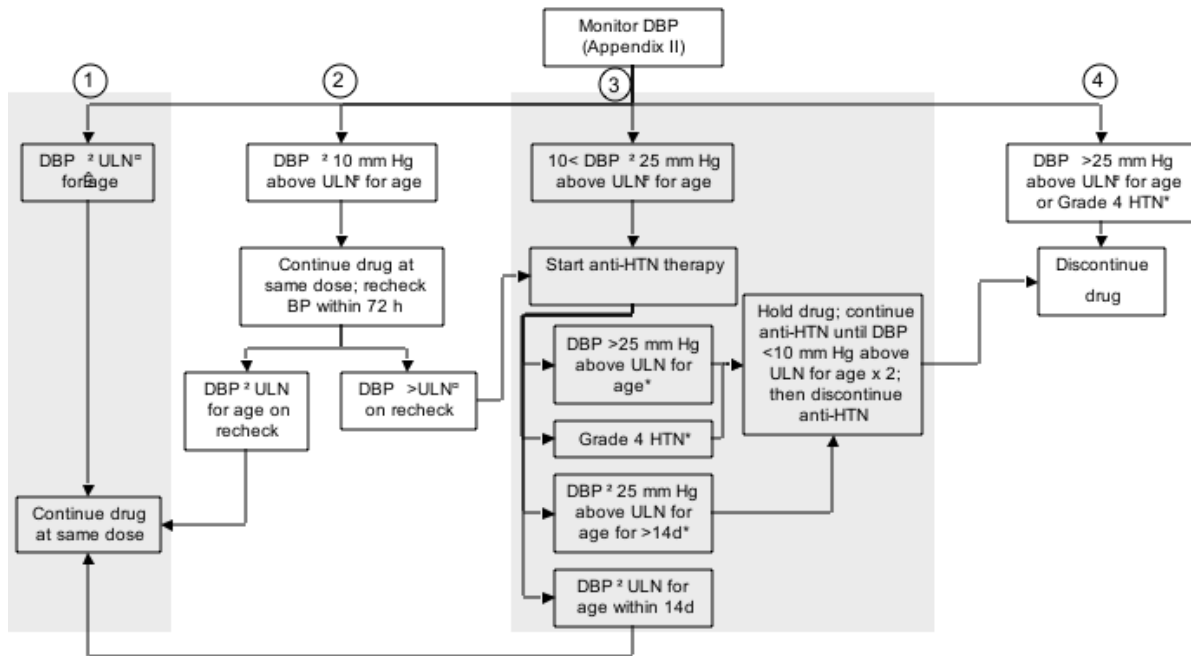

Elevated diastolic blood pressure (DBP) measurements should be repeated on the same day to confirm the elevation

° ULN (Upper Limit of Normal) is a DBP<sup>°</sup> the 95<sup>th</sup> percentile from age and gender-appropriate normal values (Appendix G)

\* If DBP > 25 mm Hg above ULN for age (verified) or grade 4 HTN at any time, discontinue drug. Antihypertensive agents can be used to control hypertension as clinically indicated after study drug is discontinued.

17

18 Arm 1 of algorithm:

19 VII.If DBP ≤ 95% for age and gender, continue bevacizumab at the same dose.

20 Arm 2 of algorithm:

21 5. If DBP ≤ 10 mm Hg above the ULN for age and gender, continue bevacizumab at same  
22 dose.

23 a. If the DBP ≤ 95% for age and gender on recheck, continue bevacizumab at same dose.

- 1        b. If the DBP remains above the ULN for age and gender on recheck, then start single agent  
2        antihypertensive therapy (consider a calcium channel blocker such as amlodipine or  
3        nifedipine) and follow arm 3 of the algorithm from the point that anti-hypertensive  
4        therapy is started.

5    Arm 3 of algorithm:

6        VIII.If DBP is 11 to 25 mm Hg above the 95% for age and gender on  $\geq 2$  of 3 measurements,  
7        start single agent anti-hypertension therapy (consider a calcium channel blocker such as  
8        amlodipine or nifedipine), continue bevacizumab at the same dose and monitor blood  
9        pressure at least every 3 days.

- 10        a . If the DBP remains elevated  $\leq 25$  mm Hg above 95% for age and gender for more  
11        than 14 days after the institution of single agent anti-hypertensive therapy,  
12        discontinue bevacizumab, but continue the antihypertensive agent until the DBP  
13        is  $\leq 10$  mm Hg above the 95% for age and gender on 2 measurements at least 3  
14        days apart.
- 15        o If the DBP increases to  $\geq 25$  mm Hg above the 95% for age and gender despite  
16        antihypertensive therapy or the participant develops grade 4 hypertension  
17        (CTCAE ), discontinue bevacizumab permanently, but continue the  
18        antihypertensive agent until the DBP is  $\leq 10$  mm Hg above the 95% for age and  
19        gender on 2 measurements at least 3 days apart.

20    Arm 4 of algorithm:

- 21        • If DBP is  $>25$  mm Hg above the 95% for age and gender or the participant develops a  
22        grade 4 hypertension (CTCAE), discontinue bevacizumab permanently and monitor  
23        blood pressure at least every 3 days. Antihypertensive agents can be used until the DBP  
24        is  $<10$  mm Hg above the 95% for age and gender on 2 measurements at least 3 days  
25        apart.
- 26        • The cycle remains 42 consecutive days in patients who have dose interruptions.

1  
2  
3  
4  
5  
6  
7  
8  
9  
10  
11

Protocol for required MRI studies of K nee

Unilateral knee MRI. Right knee preferred over left unless prohibited by contractures, lesions, pain, or hypertrophy. This is done to examine the femoral and tibial growth plates. Only the series outlined below are required for the knee MRI for evaluation of femoral and tibial growth plates and must be performed within protocol specifications as indicated below. Additional series may be obtained as indicated per institutional PI.

| T 1 Weighted Sagittal | Protocol Specifications | Actual Specifications | Reason For Change |
|-----------------------|-------------------------|-----------------------|-------------------|
| Echo Train Length     | 72                      |                       |                   |
| TR                    | 500-600                 |                       |                   |
| TE                    | min full                |                       |                   |
| Slice Thickness       | 3                       |                       |                   |
| Bandwidth             | 20 kHz                  |                       |                   |
| GAP                   | 1.5mm                   |                       |                   |
| FOV                   | 18                      |                       |                   |
| FREQ                  | 512                     |                       |                   |
| Phase                 | 256                     |                       |                   |
| NEX                   | 1                       |                       |                   |
| PHFVO                 | Full                    |                       |                   |
| Saturation            | no FS                   |                       |                   |
| OPTIONS               | Fast                    |                       |                   |

12  
13  
14  
15  
16  
17  
18  
19  
20  
21  
22  
23  
24  
25  
26

Knee MRI studies requested per protocol will be submitted to the NCI POB within 2 weeks of acquisition for volume analysis. The studies have to be sent on CD in uncompressed DICOM format. For technical support, please contact: Eva Dombi, M.D. (phone 301-451-7023, e-mail: dombie@mail.nih.gov).

Send knee MRI studies to:  
Brigitte Widemann, M.D.  
NCI, POB  
10 Center Drive, Building 10, CRC, Room 1-5750  
Bethesda, MD 20892-1101  
Phone: 301-496-7387, fax: 301-480-8872, e-mail: [widemanb@mail.nih.gov](mailto:widemanb@mail.nih.gov)

1  
2 The growth plate volume will be analyzed at the Pediatric Oncology Branch of the NCI. The  
3 NCI Pediatric Oncology Branch will inform participating investigators about the results of the  
4 MRI study by written report.  
5

1  
2  
3 Management of bone related toxicity  
4

5 Potential bone related toxicity is of great concern for this study based on pre-clinical data and  
6 because bevacizumab will be used in a pediatric population (aged 12-17 years). Therefore, we  
7 will carefully monitor for it, utilizing multiple serial measurements of height and weight,  
8 measurements of serum calcium, phosphorus, PTH, vitamin D levels, osteocalcin, bone specific  
9 alkaline phosphatase, lower extremity scanogram, knee MRI for evaluation of femoral and tibial  
10 growth plates, and DEXA scans.

11  
12 Based on experience gained from a previous study of tenofovir and impact on bone mineral  
13 density (BMD) in HIV-infected children, (83, 84) the following parameters will be used for  
14 management of decreases in lumbar spine BMD based on DEXA scan:

- 15 4 Patients with <6% BMD decrease relative to baseline from interval  
16 measurement will remain on treatment, and continue follow up as  
17 described in section 10.
- 18 5 Patients with a confirmed >6% BMD decrease relative to baseline, but  
19 BMD Z score >-2.5, will remain on treatment; however, follow up DEXA  
20 scan will occur on an every 3 month schedule.
- 21 6 Patients with a confirmed >6% BMD decrease relative to baseline and  
22 who have a BMD Z score <-2.5 will discontinue bevacizumab.

23  
24 Growth plate volume: Patients with femoral growth plate expansion 2 times the volume from  
25 baseline measurements will be taken off bevacizumab.

26  
27 For patients with open growth plates, measurements of stature (height) will be measured prior to  
28 week 12, 24, 36, and 48.

29 Bevacizumab will be discontinued if:

- 30 · <1 cm growth is noted prior to week 24
- 31 · <2.5 cm growth is noted prior to week 48
- 32 · Subsequently, <2cm/year annualized growth velocity noted every six months for patients  
33 with open growth plates only

34  
35 If there are any gross discrepancies between measurements or difficulty obtaining accurate  
36 measurements, lower extremity scanograms will be obtained as an objective measure to compare  
37 to baseline scans when clinically indicated.  
38  
39  
40

1  
2  
3 APPENDIX G: Data Safety and Monitoring Plan  
4

5 The JHCNFC and Drs. Blakeley, Plotkin and Widemann are committed to ensuring the safety  
6 of patients who participate in this clinical research. The procedures outlined below dealing with  
7 the approval of the research protocol, safety evaluation, protocol specific guidelines, data  
8 monitoring, audits, and reporting adverse events are the result of review of many clinical  
9 research programs including the Adult Brain Tumor Consortium and the Sidney Kimmel  
10 Comprehensive Cancer Center. We feel the final plan reflects a comprehensive safety  
11 monitoring plan combining the best of previously applied procedures for phase I-II trials for  
12 investigative agents. The individuals responsible for designing and implementing the protocol  
13 and the safety monitoring plans (Drs. Blakeley, Plotkin and Widemann) will be responsible for  
14 safety monitoring for this trial.  
15

16 Research Protocols: Before the research protocol is opened for accrual, the full document  
17 (including monitoring plans and informed consent documents) must be reviewed and approved  
18 by the NCI/CTEP Protocol Review Committee. Once this is completed, it must be submitted  
19 and approved by the investigational review board (IRB) of each institution that plans to open the  
20 clinical trial. IRB approvals and consents from each site must be submitted to the JHCNFC  
21 Central Operations Office for regulatory review where it will be kept on file. A site may not  
22 enroll a patient until proper IRB documentation is reviewed and approved by the JHCNFC.  
23 Additionally each participating centers' IRBs OPRR assurance numbers will have to be  
24 confirmed to be on file with the JHCNFC.  
25

26 Regulatory Documents: The JHCNFC will keep a regulatory file on each site which includes; a  
27 copy of each investigators' required CTEP/NCI 1572, their investigator number, investigator(s)  
28 CV, medical licenses', site laboratory normal's, site laboratory certificates, and site IRB roster,  
29 which will be updated regularly.  
30

31 Safety evaluations: All patients receiving investigational agents will be evaluated for safety.  
32 The safety parameters include all laboratory tests and hematological abnormalities, CNS  
33 observations, physical examination findings, and solicited reports of adverse events and  
34 spontaneous reports of adverse events reported to the investigator by patients. All toxicities  
35 encountered during the study will be evaluated according to the active version of the NCI  
36 Common Toxicity Criteria and recorded prior to each course of therapy. Life-threatening  
37 toxicities will be reported immediately to Dr. Blakeley, the local Institutional Review Board  
38 (IRB), CTEP and the FDA. Additional safety assessments and toxicity monitoring are outlined  
39 in the protocol (sections 5 and 6). Dr. Blakeley will evaluate all adverse events weekly and all  
40 SAEs within 24 hours.  
41

42 The data for this protocol will be monitored for safety and toxicity on a week-to-week basis, by  
43 the JHCNFC and this will be reported to the internal DSMC (see below).  
44

45 Data Safety Monitoring Committees: The Data Safety and Monitoring Plan includes both an  
46 Internal and an External Data Safety Monitoring Committee (DSMC).  
47

1 The Internal DSMC (I-DMSC) is made up of Drs. Blakeley, Plotkin, Widemann and the  
2 assigned CTEP monitor. Dr. Blakeley will review the submitted adverse event reports weekly  
3 and will report any serious adverse events as detailed in section 7. The I-DMSC will be the  
4 primary team making critical decisions regarding the ongoing conduct of the trial. However,  
5 decisions by this group must be unanimously agreed to by all members reviewing the data and  
6 at least three of the four members being present for the review. However, The CTEP Monitor  
7 will not have voting power; s/he will only make recommendations to the group. If all present  
8 members do not agree, the relevant materials are forwarded by the JHCNFC to the Data Safety  
9 Monitoring Committee through the Central Research Office of the Sidney Kimmel  
10 Comprehensive Cancer Center which will make a final decision. The DSMC will meet formally  
11 after the first 3, 7, 11 and 14 patients are enrolled for a complete review all AEs generated in  
12 this study as well as safety reports provided by CTEP. At that time critical appraisal will be  
13 made to determine if there are any findings that warrant change to the protocol or to the consent  
14 and to ensure that regulatory procedures have been followed appropriately.

15  
16 The primary goals of the DSMCs are to: 1) ensure that all patients enrolled on this trial receive  
17 optimal protection against research risks, and 2) ensure that patients' interests are not made  
18 secondary to the interests of the scientific investigation.

19  
20 Their responsibilities to accomplish these above objectives include:

- 21 a) To review interim analyses of outcome data (prepared by the Biostatistician or other  
22 responsible person at the time points defined in the protocols approved by the  
23 Institutional Review Board) and to recommend, if necessary, whether the study needs  
24 to be changed or terminated based on these analyses;
- 25 b) To determine whether and to whom outcome results should be released prior to the  
26 reporting of study results from this trial at the time specified in the protocol;
- 27 c) To review interim toxicity data of all phase II studies, and to review efficacy of  
28 treatment data at the completion of each study.
- 29 d) To communicate information and recommendations and propose effective resolutions  
30 for educational purposes and improved patient care and risk prevention.

31  
32  
33 **JHCNFC Monitoring:** The JHCNFC monitors the accrual and immediately suspends a study  
34 once the study has reached its enrollment goal. The Data Coordinator, Ms. Bergner, and team  
35 monitor toxicities and other events in real time and may temporarily suspend enrollment if  
36 unexpected events occur. These events are then reviewed with the I-DMSC to determine if the  
37 study may continue. If this team cannot determine a decision the external DSMC may be  
38 invoked.

39  
40 The JHCNFC and Dr. Blakeley will meet weekly to review safety data and other issues that  
41 have occurred during the week. This meeting is formally held in the JHCNFC office at Hopkins  
42 but members from other institutions may be included by teleconference. Reports are run on the  
43 study database, regarding accrual and safety issues and distributed to the team for discussion  
44 and management, with specific detail to serious adverse events, i.e. AdEERS, DLTs etc.

45  
46 **Audits:** All Consortium Trials are also monitored by the Clinical Data Update System (CDUS)

1 version 1.9. Cumulative CDUS data is submitted quarterly to CTEP by electronic means.  
 2 Reports are due January 31, April 30, July 31, and October 31. In addition, the JHCNFC will  
 3 maintain all study related documents including the current IRB approved protocol, IRB approval  
 4 from each site, case report forms and source data and be available for audit should the NCI  
 5 request this.

6  
 7 Reporting Adverse Events: Guidelines for reporting Adverse Events are clearly outlined in  
 8 section 7. This protocol has adopted and implemented the AdEERS system. All expedited  
 9 events will be phoned to the JHCNFC at the time the event is known. Dr. Blakeley and Ms.  
 10 Bergner have 24/7 beepers for this purpose. The JHCNFC will receive copies of all AdEERS  
 11 and we remind the site at the time the event is discussed with us, that the event must be sent to  
 12 their IRB according to their local IRB's policies and procedures. A copy of this submission is  
 13 also on file with the JHCNFC.

14  
 15 Guidelines for Reporting Serious Adverse Events to CTEP:

16 Investigators are to report toxicities occurring on NCI sponsored protocols according to the  
 17 guidelines provided by the National Cancer Institute on the web site at  
 18 <http://ctep.info.nih.gov/AdEERS>. Serious Adverse Events occurring on CTEP Sponsored studies  
 19 will be reported via the NCI's electronic Adverse Event Expedited Reporting System (AdEERS)  
 20 at <http://ctep.info.nih.gov/AdEERS>. When reporting via AdEERS online, it is mandatory to  
 21 include the e-mail address of protocol managers at the ABTC Data Management Center in  
 22 addition to the study chair/PI. Serious Adverse Events (SAE's) are handled according to: 1)  
 23 whether the toxicities are known or unknown, and 2) the grade of toxicity. The list of known  
 24 toxicities and specific reporting requirements are included in each protocol. If in doubt,  
 25 consider the toxicity unknown.

26  
 27 Phase 1 Trials Utilizing an Agent under a CTEP IND: AdEERS Reporting Requirements for Adverse Events That Occur Within 30  
 28 Days<sup>1</sup> of the Last Dose of the Investigational Agent  
 29

|                                                                                                                                                                                                                                                                                                                                                                                                                                                                                                                                                 | Grade 1                 | Grade 2          | Grade 2      | Grade 3                         |                          | Grade 3                       |                         | Grades 4 & 5 <sup>2</sup> |
|-------------------------------------------------------------------------------------------------------------------------------------------------------------------------------------------------------------------------------------------------------------------------------------------------------------------------------------------------------------------------------------------------------------------------------------------------------------------------------------------------------------------------------------------------|-------------------------|------------------|--------------|---------------------------------|--------------------------|-------------------------------|-------------------------|---------------------------|
|                                                                                                                                                                                                                                                                                                                                                                                                                                                                                                                                                 | Unexpected and Expected | Unexpected       | Expected     | Unexpected with Hospitalization | without Hospitalization  | Expected with Hospitalization | without Hospitalization | Unexpected and Expected   |
| Unrelated Unlikely                                                                                                                                                                                                                                                                                                                                                                                                                                                                                                                              | Not Required            | Not Required     | Not Required | 10 Calendar Days                | Not Required             | 10 Calendar Days              | Not Required            | 24-Hour; 5 Calendar Days  |
| Possible Probable Definite                                                                                                                                                                                                                                                                                                                                                                                                                                                                                                                      | Not Required            | 10 Calendar Days | Not Required | 24-Hour; 5 Calendar Days        | 24-Hour; 5 Calendar Days | 10 Calendar Days              | Not Required            | 24-Hour; 5 Calendar Days  |
| <sup>1</sup> Adverse events with attribution of possible, probable, or definite that occur <u>greater</u> than 30 days after the last dose of treatment with an agent under a CTEP IND require reporting as follows:<br>AdEERS 24-hour notification followed by complete report within 5 calendar days for: <ul style="list-style-type: none"> <li>• Grade 3 unexpected events with hospitalization or prolongation of hospitalization</li> <li>• Grade 4 unexpected events</li> <li>• Grade 5 expected events and unexpected events</li> </ul> |                         |                  |              |                                 |                          |                               |                         |                           |
| <sup>2</sup> Although an AdEERS 24-hour notification is not required for death clearly related to progressive disease, a full report is required as outlined in the table.<br>December 15, 2004                                                                                                                                                                                                                                                                                                                                                 |                         |                  |              |                                 |                          |                               |                         |                           |



Note: All deaths on study must be reported using expedited reporting regardless of causality. Attribution to treatment or other cause should be provided.

- Expedited AE reporting timelines defined:
  - “24 hours; 5 calendar days” – The investigator must initially report the AE via AdEERS within 24 hours of learning of the event followed by a complete AdEERS report within 5 calendar days of the initial 24-hour report.
  - “10 calendar days” - A complete AdEERS report on the AE must be submitted within 10 calendar days of the investigator learning of the event.
- Any medical event equivalent to CTCAE grade 3, 4, or 5 that precipitates hospitalization (or prolongation of existing hospitalization) must be reported regardless of attribution and designation as expected or unexpected with the exception of any events identified as protocol-specific expedited adverse event reporting exclusions.
- Any event that results in persistent or significant disabilities/incapacities, congenital anomalies, or birth defects must be reported via AdEERS if the event occurs following treatment with an agent under a CTEP IND.
- Use the NCI protocol number and the protocol-specific patient ID provided during trial registration on all reports.
- A list of agent specific expected adverse events can be found in the protocol.

Phase 2 and 3 Trials Utilizing an Agent under a CTEP IND: AdEERS Reporting Requirements for Adverse Events That Occur Within 30 Days<sup>1</sup> of the Last Dose of the Investigational Agent

|                            | Grade 1                 | Grade 2          | Grade 2      | Grade 3                         |                                    | Grade 3                       |                                  | Grades 4 & 5 <sup>2</sup> | Grades 4 & 5 <sup>2</sup> |
|----------------------------|-------------------------|------------------|--------------|---------------------------------|------------------------------------|-------------------------------|----------------------------------|---------------------------|---------------------------|
|                            | Unexpected and Expected | Unexpected       | Expected     | Unexpected with Hospitalization | Unexpected without Hospitalization | Expected with Hospitalization | Expected without Hospitalization | Unexpected                | Expected                  |
| Unrelated Unlikely         | Not Required            | Not Required     | Not Required | 10 Calendar Days                | Not Required                       | 10 Calendar Days              | Not Required                     | 10 Calendar Days          | 10 Calendar Days          |
| Possible Probable Definite | Not Required            | 10 Calendar Days | Not Required | 10 Calendar Days                | 10 Calendar Days                   | 10 Calendar Days              | Not Required                     | 24-Hour; 5 Calendar Days  | 10 Calendar Days          |

<sup>1</sup> Adverse events with attribution of possible, probable, or definite that occur greater than 30 days after the last dose of treatment with an agent under a CTEP IND require reporting as follows:  
 AdEERS 24-hour notification followed by complete report within 5 calendar days for:

- Grade 4 and Grade 5 unexpected events

AdEERS 10 calendar day report:

- Grade 3 unexpected events with hospitalization or prolongation of hospitalization
- Grade 5 expected events

<sup>2</sup> Although an AdEERS 24-hour notification is not required for death clearly related to progressive disease, a full report is required as outlined in the table.

December 15, 2004

30  
31  
32  
33

1 Note: All deaths on study must be reported using expedited reporting regardless of  
2 causality. Attribution to treatment or other cause should be provided.

- 3
- 4 • Expedited AE reporting timelines defined:
  - 5 ➤ “24 hours; 5 calendar days” – The investigator must initially report the AE via
  - 6 AdeERS within 24 hours of learning of the event followed by a complete AdeERS
  - 7 report within 5 calendar days of the initial 24-hour report.
  - 8 ➤ “10 calendar days” - A complete AdeERS report on the AE must be submitted within
  - 9 10 calendar days of the investigator learning of the event.
- 10
- 11 • Any medical event equivalent to CTCAE grade 3, 4, or 5 that precipitates hospitalization
- 12 (or prolongation of existing hospitalization) must be reported regardless of
- 13 attribution and designation as expected or unexpected with the exception of any
- 14 events identified as protocol-specific expedited adverse event reporting exclusions.
- 15
- 16 • Any event that results in persistent or significant disabilities/incapacities, congenital
- 17 anomalies, or birth defects must be reported via AdeERS if the event occurs following
- 18 treatment with an agent under a CTEP IND.
- 19
- 20 • Use the NCI protocol number and the protocol-specific patient ID provided during trial
- 21 registration on all reports.
- 22
- 23 • A list of agent specific expected adverse events can be found in the protocol.
- 24

25 IND Safety Reports: The Consortium takes direction from CTEP for CTEP distributed agents  
26 with regards to FDA submission of adverse events. The CTEP monitor is required to review  
27 events and determine if it requires FDA submission. Safety Reports are generated by CTEP and  
28 sent to the JHCNFC. An email will be sent to alert each site to share any IND Safety Letters and  
29 will instruct investigators to file a copy with their protocol file and send a copy to their IRB  
30 according to their local IRB’s policies and procedures. Only if the Safety Report changes the  
31 consent will accrual be stopped for a safety report. If the consent must be amended to include  
32 this event, an email will be sent alerting the sites that accrual is suspended for a protocol due to  
33 an IND Safety Report and the need to revise the consent. A site may not begin accruing to that  
34 protocol until a revised IRB approved consent is received in the JHCNFC.

35

36 AdeERS and all other “serious” toxicities will be discussed at our weekly meetings. Weekly meetings  
37 are attended by the all members of the JHCNFC and all participants in this trial will be invited to call in  
38 as well.

39

# 1 APPENDIX H: Short Form Health Survey-36

## SF-36(tm) Health Survey

Instructions for completing the questionnaire: Please answer every question. Some questions may look like others, but each one is different. Please take the time to read and answer each question carefully by filling in the bubble that best represents your response.

Patient Name: \_\_\_\_\_

SSN#: \_\_\_\_\_ Date: \_\_\_\_\_

Person helping to complete this form: \_\_\_\_\_

1. In general, would you say your health is:

- Excellent
- Very good
- Good
- Fair
- Poor

2. Compared to one year ago, how would you rate your health in general now?

- Much better now than a year ago
- Somewhat better now than a year ago
- About the same as one year ago
- Somewhat worse now than one year ago
- Much worse now than one year ago

3. The following items are about activities you might do during a typical day. Does your health now limit you in these activities? If so, how much?

a. Vigorous activities, such as running, lifting heavy objects, participating in strenuous sports.

- Yes, limited a lot.
- Yes, limited a little.
- No, not limited at all.

b. Moderate activities, such as moving a table, pushing a vacuum cleaner, bowling, or playing golf?

- Yes, limited a lot.
- Yes, limited a little.
- No, not limited at all.

c. Lifting or carrying groceries.

- Yes, limited a lot.
- Yes, limited a little.
- No, not limited at all.

d. Climbing several flights of stairs.

- Yes, limited a lot.
- Yes, limited a little.
- No, not limited at all.

e. Climbing one flight of stairs.

- Yes, limited a lot.
- Yes, limited a little.
- No, not limited at all.

f. Bending, kneeling or stooping.

- Yes, limited a lot.
- Yes, limited a little.
- No, not limited at all.

- g. Walking more than one mile.
  - Yes, limited a lot.
  - Yes, limited a little.
  - No, not limited at all.
- h. Walking several blocks.
  - Yes, limited a lot.
  - Yes, limited a little.
  - No, not limited at all.
- i. Walking one block.
  - Yes, limited a lot.
  - Yes, limited a little.
  - No, not limited at all.
- j. Bathing or dressing yourself.
  - Yes, limited a lot.
  - Yes, limited a little.
  - No, not limited at all.

4. During the past 4 weeks, have you had any of the following problems with your work or other regular daily activities as a result of your physical health?

- a. Cut down the amount of time you spent on work or other activities?
  - Yes
  - No
- b. Accomplished less than you would like?
  - Yes
  - No
- c. Were limited in the kind of work or other activities
  - Yes
  - No
- d. Had difficulty performing the work or other activities (for example, it took extra time)
  - Yes
  - No

5. During the past 4 weeks, have you had any of the following problems with your work or other regular daily activities as a result of any emotional problems (such as feeling depressed or anxious)?

- a. Cut down the amount of time you spent on work or other activities?
  - Yes
  - No
- b. Accomplished less than you would like
  - Yes
  - No
- c. Didn't do work or other activities as carefully as usual
  - Yes
  - No

6. During the past 4 weeks, to what extent has your physical health or emotional problems interfered with your normal social activities with family, friends, neighbors, or groups?

- Not at all
- Slightly
- Moderately
- Quite a bit
- Extremely

7. How much bodily pain have you had during the past 4 weeks?

- Not at all
- Slightly
- Moderately
- Quite a bit
- Extremely

8. During the past 4 weeks, how much did pain interfere with your normal work (including both work outside the home and housework)?

- Not at all
- Slightly
- Moderately
- Quite a bit
- Extremely

9. These questions are about how you feel and how things have been with you during the past 4 weeks. For each question, please give the one answer that comes closest to the way you have been feeling. How much of the time during the past 4 weeks.

a. did you feel full of pep?

- All of the time
- Most of the time
- A good bit of the time
- Some of the time
- A little of the time
- None of the time

b. have you been a very nervous person?

- All of the time
- Most of the time
- A good bit of the time
- Some of the time
- A little of the time
- None of the time

c. have you felt so down in the dumps nothing could cheer you up?

- All of the time
- Most of the time
- A good bit of the time
- Some of the time
- A little of the time
- None of the time

d. have you felt calm and peaceful?

- All of the time
- Most of the time
- A good bit of the time
- Some of the time
- A little of the time
- None of the time

e. did you have a lot of energy?

- All of the time
- Most of the time
- A good bit of the time
- Some of the time
- A little of the time
- None of the time

f. have you felt downhearted and blue?

- All of the time
- Most of the time
- A good bit of the time
- Some of the time
- A little of the time
- None of the time

- g. did you feel worn out?
- All of the time
  - Most of the time
  - A good bit of the time
  - Some of the time
  - A little of the time
  - None of the time

- h. have you been a happy person?
- All of the time
  - Most of the time
  - A good bit of the time
  - Some of the time
  - A little of the time
  - None of the time

- i. did you feel tired?
- All of the time
  - Most of the time
  - A good bit of the time
  - Some of the time
  - A little of the time
  - None of the time

10. During the past 4 weeks, how much of the time has your physical health or emotional problems interfered with your social activities (like visiting friends, relatives, etc.)?

- All of the time
- Most of the time
- Some of the time
- A little of the time
- None of the time

11. How TRUE or FALSE is each of the following statements for you?

- a. I seem to get sick a little easier than other people
- Definitely true
  - Mostly true
  - Don't know
  - Mostly false
  - Definitely false

- b. I am as healthy as anybody I know
- Definitely true
  - Mostly true
  - Don't know
  - Mostly false
  - Definitely false

- c. I expect my health to get worse
- Definitely true
  - Mostly true
  - Don't know
  - Mostly false
  - Definitely false

- d. My health is excellent
- Definitely true
  - Mostly true
  - Don't know
  - Mostly false
  - Definitely false

1  
2  
3  
4  
5  
6  
7

APPENDIX I: Speech, Spatial and Qualities of Hearing Scale

Please see attached PDF.

1  
2  
3  
4

APPENDIX J: Tinnitus Reaction Questionnaire (TRQ)<sup>a</sup>

The study team member administering the TRQ tool to subjects must review responses at the time that the tool is completed. If items numbered 8, 19, 22, and/or 24 are endorsed with a 3 or 4, the local PI should be immediately notified and a psychologist, social worker or psychiatry provider from the hospital should come to talk to the subject prior to them leaving the clinical setting that day.

| Number | Item                                                       | Scores <sup>b</sup> |   |   |   |   |
|--------|------------------------------------------------------------|---------------------|---|---|---|---|
|        |                                                            | 0                   | 1 | 2 | 3 | 4 |
| 1      | My tinnitus has made me unhappy.                           | 0                   | 1 | 2 | 3 | 4 |
| 2      | My tinnitus has made me feel tense.                        | 0                   | 1 | 2 | 3 | 4 |
| 3      | My tinnitus has made me feel irritable.                    | 0                   | 1 | 2 | 3 | 4 |
| 4      | My tinnitus has made me feel angry.                        | 0                   | 1 | 2 | 3 | 4 |
| 5      | My tinnitus has led me to cry.                             | 0                   | 1 | 2 | 3 | 4 |
| 6      | My tinnitus has led me to avoid quiet situations.          | 0                   | 1 | 2 | 3 | 4 |
| 7      | My tinnitus has made me feel less interested in going out. | 0                   | 1 | 2 | 3 | 4 |
| 8      | My tinnitus has made me feel depressed.                    | 0                   | 1 | 2 | 3 | 4 |
| 9      | My tinnitus has made me feel annoyed.                      | 0                   | 1 | 2 | 3 | 4 |
| 10     | My tinnitus has made me feel confused.                     | 0                   | 1 | 2 | 3 | 4 |
| 11     | My tinnitus “driven me crazy”.                             | 0                   | 1 | 2 | 3 | 4 |
| 12     | My tinnitus interfered with my enjoyment of life.          | 0                   | 1 | 2 | 3 | 4 |
| 13     | My tinnitus made it hard for me to concentrate.            | 0                   | 1 | 2 | 3 | 4 |
| 14     | My tinnitus has made it hard for me to relax.              | 0                   | 1 | 2 | 3 | 4 |
| 15     | My tinnitus has made me feel distressed.                   | 0                   | 1 | 2 | 3 | 4 |
| 16     | My tinnitus has made me feel helpless.                     | 0                   | 1 | 2 | 3 | 4 |



|    |                                                                                                                              |   |   |   |   |   |
|----|------------------------------------------------------------------------------------------------------------------------------|---|---|---|---|---|
| 17 | My tinnitus has made me feel frustrated with things.                                                                         | 0 | 1 | 2 | 3 | 4 |
| 18 | My tinnitus has interfered with my ability to work.                                                                          | 0 | 1 | 2 | 3 | 4 |
| 19 | My tinnitus has led me to despair.                                                                                           | 0 | 1 | 2 | 3 | 4 |
| 20 | My tinnitus has led me to avoid noisy situations.                                                                            | 0 | 1 | 2 | 3 | 4 |
| 21 | My tinnitus has led me to avoid social situations.                                                                           | 0 | 1 | 2 | 3 | 4 |
| 22 | My tinnitus has made me feel hopeless about the future.                                                                      | 0 | 1 | 2 | 3 | 4 |
| 23 | My tinnitus has interfered with my sleep.                                                                                    | 0 | 1 | 2 | 3 | 4 |
| 24 | My tinnitus led me to think about suicide.                                                                                   | 0 | 1 | 2 | 3 | 4 |
| 25 | My tinnitus has made me feel panicky.                                                                                        | 0 | 1 | 2 | 3 | 4 |
| 26 | My tinnitus has made me feel tormented.                                                                                      | 0 | 1 | 2 | 3 | 4 |
| a  | From Wilson et al, 1991                                                                                                      |   |   |   |   |   |
| b  | 0 = not at all, 1 = a little of the time, 2 = some of the time, 3 = a good deal of the time, and 4 = almost all of the time. |   |   |   |   |   |

- 1
- 2
- 3
- 4

1  
2  
3 APPENDIX K: Evaluation of Vestibular Function (for Subjects Enrolled at NCI only)  
4

5         Subjects enrolled at the NCI will be evaluated for effects of bevacizumab on vestibular  
6 function. As most NF2 VS originate from the vestibular nerve, it is possible that treatment with  
7 bevacizumab will result in a change and possibly in improvement of vestibular function. This  
8 would be of clinical significance since, until now, loss of vestibular function has been largely left  
9 untreated and undermanaged in patients with NF2. Similar to a loss of hearing, a loss of  
10 vestibular function can significantly compound a patient's ability to adequately function in daily  
11 life, leading to social isolation and underemployment.  
12

13 Vestibular Research in NF2: Etiology of Vestibular Schwannomas  
14

15         Most studies investigating the audiological effects of NF2 tumors have focused on  
16 hearing sensitivity rather than vestibular function. To date, only a few studies have attempted to  
17 characterize the NF2 vestibular phenotype. Sporadic acoustic neuromas are thought to most  
18 often originate from the inferior branch of the vestibular nerve (IBVN) rather than the superior  
19 branch (SBVN). In contrast, the affinity of vestibular schwannomas associated with NF2 to one  
20 particular nerve branch is essentially unknown. Wang et al (2005) provide evidence that the  
21 origin of most NF2-related VSs is the SBVN. This finding has been supported by Slattery et al  
22 (1998) who documented a 19% occurrence rate for VSs originating from the IBVN in a series of  
23 patients who underwent surgical resection of the tumor. Wang et al (2005) proposed that tests  
24 dependent upon superior branch vestibular nerve function, such as the caloric test, were often  
25 significantly impacted when tumor size was medium or larger (>1cm). However, vestibular tests  
26 dependent upon IBVN function were only impacted when tumor size was large (>3cm) and may  
27 be able to serve as an indicator of the degree of NF2 infiltration without surgical examination. In  
28 light of this data supporting an affinity for NF2 tumors to originate from the SBVN, combined  
29 with better clinical data being derived from the IBVN, a combined approach evaluating both  
30 branches of the vestibular nerve is warranted.  
31

32 Vestibular Tests of Inferior Vestibular Nerve Branch Function

1  
2  
3  
4  
5  
6  
7  
8  
9  
10  
11  
12  
13  
14  
15  
16  
17  
18  
19  
20  
21  
22  
23  
24  
25  
26  
27  
28  
29  
30  
31

Vestibular tests investigating the IBVN are somewhat uncommon and not regularly performed in the clinical setting. The IBVN primarily innervates the posterior semicircular canal and the saccular end organs of the peripheral vestibular system on each side. Until recently, there was not any direct means by which these end organs and the IBVN could effectively and individually be stimulated and subsequently evaluated. The vestibular evoked myogenic potential (VEMP) is an inhibitory sacculocollic reflex recorded from the ipsilateral sternocleidomastoid muscle in response to acoustic stimulation of the saccule (Timmer et al, 2006). Strong evidence supports a saccular stimulation resulting in subsequent IBVN activation during this test. Studies within the past decade have proven the VEMP to be a reliable and effective measure of both saccular and IBVN integrity.

**Vestibular Tests of Superior Vestibular Nerve Branch Function**

Vestibular tests investigating the SBVN are far more common and regularly performed on a routine basis. In particular, computerized controlled rotational testing primarily investigates the physiologic response of the horizontal semicircular canal and indirectly, the SBVN. In addition, caloric irrigations during videonystagmography also indirectly investigate the SBVN by directly stimulating the horizontal semicircular canal. Between these two measures, caloric testing exhibits significantly less intertest reliability and subsequently is a less desirable measure during repeated study designs. On the other hand, rotational testing offers a high degree of reliability and repeatability, which makes it an excellent test to monitor vestibular function over a period of time.

**Purpose of the Study and Research Question**

**Purpose of the Study**

The purpose of the study is to determine whether or not a change in vestibular function is observed in patients with NF2 over the course of treatment with bevacizumab. Vestibular function will be assessed at baseline using measures sensitive to IVBN and SBVN function.

1 These same measures will be repeated during the course of bevacizumab treatment at the same  
2 time as hearing is evaluated (Section 10, study calendar).

3  
4

5 Vestibular function will be evaluated using the following procedures:

6

7 Rotational Vestibular Testing. Eye movements will be recorded during rotational testing in a  
8 lightproof enclosure via binocular infrared video goggles. The patient will be seated in the  
9 rotational chair and belted securely in place using a three-point harness. Audio communication  
10 between the patient and the tester will occur during the entire test through a two way head set  
11 and a video camera will allow the examiner to view the patient throughout the test. Eye  
12 movements will be observed and recorded during sinusoidal harmonic acceleration (SHA) of the  
13 rotary chair at the following speeds: 0.01, 0.02, 0.04, 0.08, 0.16, 0.32, 0.64, 1.28, and 2.0  
14 Hz. Eye movements will also be observed and recorded during velocity step testing (VST) in  
15 which the rotary chair accelerates to a sustained velocity rotation in both the clockwise and  
16 counter-clockwise directions at 240 degrees per second. During both SHA and VST testing, eye  
17 movements will be recorded in response to the various rotational accelerations of the chair.

18 Vestibular evoked myogenic potentials (VEMP). VEMP waveforms will be recorded via  
19 surface electrodes placed on the sternocleidomastoid (SCM) muscle, sternum, and mastoid.  
20 Low frequency, short duration tone bursts at 500 Hz will be delivered to the ear via insert  
21 earphones to elicit a vestibular response. Signal levels will not exceed those used in standard  
22 audiometric testing and will range from 85-107 dB HL. During signal delivery, patients are  
23 instructed to maintain SCM muscle contraction by holding the head slightly elevated from a  
24 supine or semi-recumbent position for 1-3 minutes. The level of SCM contraction will be  
25 monitored by an EMG monitoring system during administration of the test, providing  
26 patients with feedback that will allow them to adjust the amount of contraction to achieve  
27 muscle tension within an optimal EMG range. The delivery of the acoustic stimulus and the  
28 EMG monitoring of the SCM muscles using surface electrodes adds no additional risk to the  
29 patient with the exception of possible slight physical fatigue of the neck muscles while  
30 maintaining contraction of the SCM muscle.

31

1 Test Protocol

2 In addition to all hearing measures, vestibular assessment using SHA, VST and VEMP will  
3 be conducted on the same day as, and to follow each scheduled follow-up audiology  
4 appointment. Furthermore, SHA, VST and VEMP testing will be conducted on two  
5 concurrent occasions during the initial appointment (week 0 baseline), mid-study  
6 appointment (week 24) and final appointment (48 week) in order to document intrasubject  
7 variability of each test.

8

9

10

1  
2  
3 APPENDIX L: Patient Experience in an Experimental Therapeutic Clinical Trial  
4

5 To explore how patient involvement in an experimental therapeutic clinical trial might be  
6 impacting perceived quality of life, and vice versa, we will pose three open-ended questions to  
7 all subjects enrolled in this trial following enrollment and seven open-ended questions after  
8 completing 49 weeks of treatment. If the subject is between the ages of 12 and 17 years, the  
9 questions will also be posed to one of the parents/guardians of the subject enrolled.

10  
11 The first set of questions will be asked of participants between the date that they formally  
12 consent to participate in the trial and the first pre-study brain MRI (4 days prior to beginning  
13 on trial). The second set of questions will be asked of participants between the date of their 49  
14 week visit and the date of their off-study visit. All subjects will be interviewed by the same  
15 examiner. Questions will be posed by phone for all participants not available to meet in person  
16 with the examiner.

17  
18 All responses will be taped, transcribed and analyzed for thematic content. The first set of  
19 questions are listed here:

- 20  
21 1. Why are you participating in this trial?  
22  
23 2. If you were to make a prediction, do you think that you will have a positive response to  
24 bevacizumab? Why or why not?  
25  
26 3. How would you describe the impact that NF2 has had on your life so far?  
27

28 The second set of questions are listed here:

- 29  
30 1. Do you feel that you had improvement in your symptoms with bevacizumab? If so,  
31 please describe the improvements and the impact of any improvements on your daily  
32 life.  
33 2. Did you have any side effects while getting bevacizumab? If so, please describe what  
34 side effects you experienced and how troubling they were to you? Did they continue for  
35 the length of the study?  
36 3. Did you ever consider not continuing to take bevacizumab because of side effects?  
37 Why or why not?  
38 4. Now knowing what it is like to receive bevacizumab every three weeks along with the  
39 monitoring studies, would you choose to do it again? Why or why not?  
40 5. What are the most important factors in that decision?  
41 6. How would you describe the amount of time, energy and money that being in this study  
42 required from you?  
43 7. Did you experience any times during the trial when you didn't want to continue taking  
44 bevacizumab? Why or why not?  
45  
46

1  
2 APPENDIX M: Patient Eligibility Checklist

3  
4 **PATIENT ELIGIBILITY CHECKLIST**

5 Patient Name \_\_\_\_\_ DOB \_\_\_\_\_

6  
7 Medical Record # \_\_\_\_\_ Site (circle one) JHU MGH NCI

8  
9 Date eligibility screened: \_\_\_\_\_ By whom?  
10 \_\_\_\_\_

11

|        | American Indian or Alaskan Native | Asian or Pacific Islander | Black, not of Hispanic Origin | Hispanic | White, Not of Hispanic Origin | Other or Unknown |
|--------|-----------------------------------|---------------------------|-------------------------------|----------|-------------------------------|------------------|
| Male   |                                   |                           |                               |          |                               |                  |
| Female |                                   |                           |                               |          |                               |                  |

12  
13  
14  
15  
16  
17 Please ask each question to the patient being screened and circle the answer given. If the answer indicates  
18 that the patient is not eligible, you may suspend screening at that point in the questionnaire.

19  
20 1. Is this patient 12 years of age or older?

21 YES (continue) NO (not eligible)

22  
23 2. By which mechanism does this patient meet criteria for NF2?

24 Germline mutation (continue)  
25 NIH criteria (continue)  
26 Manchester criteria (continue)  
27 Does not meet criteria for NF2 (not eligible)  
28

29 3. Does this patient have at least one vestibular schwannoma (VS) that is  $\geq 1.5$  cm (on longest  
30 diameter) on a contrast-enhanced cranial MRI scan with fine cuts through the internal auditory  
31 canal (3 mm slices, no skip)?

32 YES (continue) NO (not eligible)

33  
34 4. Does this patient have a history of progressive hearing loss over the past 24 months?

35 YES (continue) NO (not eligible)

36  
37 5. Is this patient currently pregnant or breast-feeding?

38 YES (not eligible) NO (continue)  
39  
40

- 1 6.Can this patient provide written informed consent (age 18 or older) or assent (age 12-17) with a  
2 parent/guardian willing and able to give written consent?  
3 YES (continue) NO (not eligible)  
4
- 5 7. Has this patient ever been treated with bevacizumab or other VEGF targeting therapies?  
6 YES (not eligible) NO (continue)  
7
- 8 8.Does this patient have a life expectancy of 6 months or greater?  
9 YES (continue) NO (not eligible)  
10
- 11 9.Has this patient had a discussion of all available treatment options, including risks and benefits,  
12 for their VS including surgery, radiation therapy, observation, and other clinical trials?  
13 YES (continue) NO (not eligible)  
14
- 15 10. Is this patient's VS not amenable to surgery or has this patient refused surgery for their  
16 VS?  
17 YES (continue) NO (not eligible)  
18
- 19 11. Is this patient currently in need of radiation therapy, surgery or medical treatment for any  
20 other NF2-associated tumors (i.e. ependymoma, non-vestibular schwannoma, meningioma)?  
21  
22 YES (not eligible) NO (continue)  
23
- 24 12. Does this patient have clinically significant cardiovascular disease, such as:  
25 7 Inadequately controlled hypertension Inadequately controlled HTN (adult subjects: SBP > 160  
26 mmHg and/or DBP > 90 mmHg despite antihypertensive medication, pediatric subjects:  
27 Requirement for antihypertensive treatment prior to enrollment, or diastolic blood pressure  
28 >95<sup>th</sup> percentile for age –Appendix G))  
29 8 History of CVA within 12 months  
30 9 Myocardial infarction or unstable angina within 12 months  
31 10New York heart association grade II or greater congestive heart failure  
32 11 Serious and inadequately controlled cardiac arrhythmia  
33 12Significant vascular disease (e.g. aortic aneurysm, history of aortic dissection)  
34 13Clinically significant peripheral vascular disease  
35 YES (not eligible) NO (continue)  
36
- 37 13. Does this patient have any uncontrolled intercurrent illness, including but not limited to,  
38 ongoing or active infection, or psychiatric illness/social situations that would limit  
39 compliance with study requirements?  
40 YES (not eligible) NO (continue)  
41
- 42 14. Does this patient currently take anti-coagulant drugs (not including prophylactic doses)?  
43 YES (not eligible) NO (continue)  
44
- 45 15. Does this patient have a personal history of coagulopathy (i.e. ITP or other autoimmune  
46 hematologic condition) or current evidence of bleeding diathesis or coagulopathy?  
47 YES (not eligible) NO (continue)



- 1  
2  
3 16. Does this patient have a history of spontaneous or symptomatic intracranial hemorrhage?  
4 YES (not eligible) NO (continue)  
5  
6 17. Does this patient have any newly identified hemorrhage within the past 6 months?  
7 YES (not eligible) NO (continue)  
8  
9  
10 18. Does this patient have a serious or non-healing wound, ulcer, or bone fracture?  
11 YES (not eligible) NO (continue)  
12  
13 19. Does this patient have a history of abdominal fistula, gastrointestinal perforation or intra-  
14 abdominal abscess within the past 6 months?  
15 YES (not eligible) NO (continue)  
16  
17 20. Has this patient had an invasive procedure, including surgery, biopsy, or intra-arterial  
18 procedure, within the past 28 days?  
19 YES (not eligible) NO (continue)  
20  
21 21. Has this patient stopped all chemotherapy and anti-cancer therapy for at least 4 weeks?  
22 YES (continue) NO (not eligible)  
23  
24 22. Is this patient taking any other investigational agents currently?  
25 YES (not eligible) NO (continue)  
26  
27 23. Has this patient taken any nitrosoureas or mitomycin C within the past 6 weeks?  
28 YES (not eligible) NO (continue)  
29  
30 24. Does this patient have known sensitivity to Chinese hamster ovary cell products, other  
31 recombinant human antibodies, or compounds of similar chemical or biologic composition to  
32 bevacizumab?  
33 YES (not eligible) NO (continue)  
34  
35 25. Is this patient able to tolerate periodic MRI scans and gadolinium contrast without the need  
36 for general anesthesia?  
37 YES (continue) No (not eligible)  
38  
39 26. Is this patient of childbearing potential?  
40 YES (continue to question 27) NO (continue to question 28)  
41  
42 27. Has this patient agreed to use birth control/contraception for the length of this trial?  
43 YES, method \_\_\_\_\_ (continue) NO (not eligible)  
44  
45

**\*Note: you must submit a copy of the source documents to verify each of the following results\***

28. Does this patient have a word recognition score of less than 90% in the target ear related to their VS (i.e. not due to prior interventions such as surgery and radiation) as assessed by an audiologist associated with this study?

YES (continue)                      NO (not eligible)

29. Does this patient have a Karnofsky or Lansky performance status of  $\geq 60\%$  (i.e. can the patient care for himself/herself with occasional help from others)?

YES (continue)                      NO (not eligible)

30. Please provide documentation of the following (if any of these lab results cannot be documented, the patient is not eligible for this study):

1. absolute neutrophil count  $\geq 1,500/\text{mcL}$
2. platelet count  $\geq 100,000/\text{mcL}$
3. leukocytes  $\geq 3,000/\text{mcL}$
4. urine protein creatinine (UPC) ratio  $< 0.5$  OR urine dipstick protein  $< 2+$
5. total bilirubin  $\leq$  twice the upper limit of institutional normal
6. AST (SGOT)/ALT (SGPT)  $\leq 2.5$  times ULN
7. creatinine clearance or radioisotope GFR  $\geq 60\text{ml}/\text{min}/1.73\text{ m}^2$  OR a normal serum creatinine based on age described in the table below:

| Age (years)               | Maximum Serum Creatinine (mg/dL) |
|---------------------------|----------------------------------|
| $\leq 5$                  | 0.8                              |
| $5 < \text{age} \leq 10$  | 1.0                              |
| $10 < \text{age} \leq 15$ | 1.2                              |
| $> 15$                    | 1.5                              |

31. Does this patient have any collision tumors that make volumetric measurement of the target VS not possible to perform?

YES (not eligible)                      No (continue)

32. Does this patient have a documented negative pregnancy test?

NOT APPLICABLE (patient is male OR not of childbearing potential)  
 YES (eligible)  
 NO (not eligible)

Eligibility screened by: \_\_\_\_\_ Date: \_\_\_\_\_

\_\_\_\_\_  
 (signature of person completing screening)

If question 32 indicates that this patient is eligible for the study, please see the Study Manual for directions on registering this patient on the study.

1  
2  
3  
4  
5  
6  
7  
8  
9  
10  
11  
12  
13  
14  
15  
16  
17  
18  
19  
20  
21  
22  
23  
24  
25

References

1. CBTRUS. Statistical report: Primary brain tumors in the united states, 1998-2002. Published by the Central Brain Tumor Registry of the United States. 2005.
2. Otsuka G, Saito K, Nagatani T, Yoshida J. Age at symptom onset and long-term survival in patients with neurofibromatosis type 2. *J Neurosurg* 2003;99:480-483.
3. Badie B, Pyle GM, Nguyen PH, Hadar EJ. Elevation of internal auditory canal pressure by vestibular schwannomas. *Otol Neurotol* 2001;22:696-700.
4. Evans DGR, Birch JM, Ramsden RT, Sharif S, Baser ME. Malignant transformation and new primary tumours after therapeutic radiation for benign disease: Substantial risks in certain tumour prone syndromes. *J Med Genet* 2006;43:289-294.
5. Mathieu D, Kondziolka D, Flickinger JC, et al. Stereotactic radiosurgery for vestibular schwannomas in patients with neurofibromatosis type 2: An analysis of tumor control, complications, and hearing preservation rates. *Neurosurgery* 2007;60:460-468.
6. Plotkin SR, Stemmer-Rachamimov AO, Barker FG, 2nd, et al. Hearing improvement after bevacizumab in patients with neurofibromatosis type 2. *N Engl J Med* 2009;361:358-367.
7. Mahmud MR, Khan AM, Nadol JB J. Histopathology of the inner ear in unoperated acoustic neuroma. *Ann Otol Rhinol Laryngol* 2003;112:979-986.
8. Thornton AR, Raffin MJ. Speech-discrimination scores modeled as a binomial variable. *J Speech Hear Res* 1978;21:507-518.
9. Halpin C, Rauch SD. Using audiometric thresholds and word recognition in a treatment study. *Otol Neurotol* 2006;27:110-116.

- 1 10. American Academy of Otolaryngology-Head and Neck Surgery Foundation, INC.  
2 Committee on hearing and equilibrium guidelines for the evaluation of hearing preservation in  
3 acoustic neuroma (vestibular schwannoma). *Otolaryngol Head Neck Surg* 1995;113:179-180.
- 4 11. Harris GJ, Plotkin SR, Maccollin M, et al. Three-dimensional volumetrics for tracking  
5 vestibular schwannoma growth in neurofibromatosis type II. *Neurosurgery* 2008;62:1314-9;  
6 discussion 1319-20.
- 7 12. Solomon J, Warren K, Dombi E, Patronas N, Widemann B. Automated detection and  
8 volume measurement of plexiform neurofibromas in neurofibromatosis 1 using magnetic  
9 resonance imaging. *Comput Med Imaging Graph* 2004;28:257-265.
- 10 13. Babovic-Vuksanovic D, Ballman K, Michels V, et al. Phase II trial of pirfenidone in adults  
11 with neurofibromatosis type 1 *Neurology* 2006;67:1860-1862.
- 12 14. Dombi E, Solomon J, Gillespie AJ, et al. NF1 plexiform neurofibroma growth rate by  
13 volumetric MRI: Relationship to age and body weight *Neurology* 2007;68:643-647.
- 14 15. Jackson A, Kassner A, Zhu XP, Li KL. Reproducibility of T2\* blood volume and vascular  
15 tortuosity maps in cerebral gliomas *J Magn Reson Imaging* 2001;14:510-516.
- 16 16. Zhu XP, Li KL, Kamaly-Asl ID, et al. Quantification of endothelial permeability, leakage  
17 space, and blood volume in brain tumors using combined T1 and T2\* contrast-enhanced  
18 dynamic MR imaging. *J Magn Reson Imaging* 2000;11:575-585.
- 19 17. Medved M, Karczmar G, Yang C, et al. Semiquantitative analysis of dynamic contrast  
20 enhanced MRI in cancer patients: Variability and changes in tumor tissue over time. *J Magn*  
21 *Reson Imaging* 2004;20:122-128.
- 22 18. Akella NS, Twieg DB, Mikkelsen T, et al. Assessment of brain tumor angiogenesis  
23 inhibitors using perfusion magnetic resonance imaging: Quality and analysis results of a phase

- 1 I trial J Magn Reson Imaging 2004;20:913-922.
- 2 19. Batchelor TT, Sorensen AG, di Tomaso E, et al. AZD2171, a pan-VEGF receptor tyrosine  
3 kinase inhibitor, normalizes tumor vasculature and alleviates edema in glioblastoma patients  
4 Cancer Cell 2007;11:83-95.
- 5 20. Willett CG, Boucher Y, di Tomaso E, et al. Direct evidence that the VEGF-specific  
6 antibody bevacizumab has antivasular effects in human rectal cancer Nat Med 2004;10:145-  
7 147.
- 8 21. Willett CG, Boucher Y, Duda DG, et al. Surrogate markers for antiangiogenic therapy and  
9 dose-limiting toxicities for bevacizumab with radiation and chemotherapy: Continued  
10 experience of a phase I trial in rectal cancer patients J Clin Oncol 2005;23:8136-8139.
- 11 22. Zhu AX, Sahani DV, di Tomaso E, et al. Sunitinib monotherapy in patients with advanced  
12 hepatocellular carcinoma (HCC): Insights from a multidisciplinary phase II study Journal of  
13 Clinical Oncology 2008;26:218s. Abstract.
- 14 23. Duda DG, Cohen KS, Ancukiewicz M, et al. A comparative study of circulating endothelial  
15 cells (CECs) and circulating progenitor cells (CPCs) kinetics in four multidisciplinary phase II  
16 studies of antiangiogenic agents. Journal of Clinical Oncology 2008;26:164s. Abstract.
- 17 24. Dorrell MI, Aguilar E, Schepke L, Barnett FH, Friedlander M. Combination angiostatic  
18 therapy completely inhibits ocular and tumor angiogenesis. Proc Natl Acad Sci U S A  
19 2007;104:967-972.
- 20 25. Ferrara N, Damico L, Shams N, Lowman H, Kim R. Development of ranibizumab, an anti-  
21 vascular endothelial growth factor antigen binding fragment, as therapy for neovascular age-  
22 related macular degeneration. Retina 2006;26:859-870.
- 23 26. Cai W, Kassarian A, Bredella MA, et al. Tumor burden in patients with neurofibromatosis

1 types 1 and 2 and schwannomatosis: Determination on whole-body MR images. *Radiology*  
2 2009;250:665-673.

3 27. Baser ME, Kuramoto L, Joe H, et al. Genotype-phenotype correlations for nervous system  
4 tumors in neurofibromatosis 2: A population-based study *Am J Hum Genet* 2004;75:231-239.

5 28. Dalgorf DM, Rowsell C, Bilbao JM, Chen JM. Immunohistochemical investigation of  
6 hormone receptors and vascular endothelial growth factor concentration in vestibular  
7 schwannoma. *Skull Base* 2008;18:377-384.

8 29. Koutsimpelas D, Stripf T, Heinrich UR, Mann WJ, Brieger J. Expression of vascular  
9 endothelial growth factor and basic fibroblast growth factor in sporadic vestibular  
10 schwannomas correlates to growth characteristics. *Otol Neurotol* 2007;28:1094-1099.

11 30. Caye-Thomasen P, Baandrup L, Jacobsen GK, Thomsen J, Stangerup SE.  
12 Immunohistochemical demonstration of vascular endothelial growth factor in vestibular  
13 schwannomas correlates to tumor growth rate. *Laryngoscope* 2003;113:2129-2134.

14 31. Wasa J, Nishida Y, Suzuki Y, et al. Differential expression of angiogenic factors in  
15 peripheral nerve sheath tumors. *Clin Exp Metastasis* 2008;25:819-825.

16 32. Nakayama T, Cho YC, Mine Y, et al. Expression of vascular endothelial growth factor and  
17 its receptors VEGFR-1 and 2 in gastrointestinal stromal tumors, leiomyomas and  
18 schwannomas *World J Gastroenterol* 2006;12:6182-6187.

19 33. Saito K, Kato M, Susaki N, Nagatani T, Nagasaka T, Yoshida J. Expression of ki-67  
20 antigen and vascular endothelial growth factor in sporadic and neurofibromatosis type 2-  
21 associated schwannomas. *Clin Neuropathol* 2003;22:30-34.

22 34. Evans DG, Baser ME, O'Reilly B, et al. Management of the patient and family with  
23 neurofibromatosis 2: A consensus conference statement. *Br J Neurosurg* 2005;19:5-12.

- 1 35. Slattery WH,3rd, Fisher LM, Iqbal Z, Oppenheimer M. Vestibular schwannoma growth  
2 rates in neurofibromatosis type 2 natural history consortium subjects. *Otol Neurotol*  
3 2004;25:811-817.
- 4 36. Mosges R, Koberlein J, Erdtracht B, Klingel R, RHEO-ISHL Study Group. Quality of life  
5 in patients with idiopathic sudden hearing loss: Comparison of different therapies using the  
6 medical outcome short form (36) health survey questionnaire. *Otol Neurotol* 2008;29:769-775.
- 7 37. Poissant SF, Beaudoin F, Huang J, Brodsky J, Lee DJ. Impact of cochlear implantation on  
8 speech understanding, depression, and loneliness in the elderly. *J Otolaryngol Head Neck Surg*  
9 2008;37:488-494.
- 10 38. Zhao F, Bai Z, Stephens D. The relationship between changes in self-rated quality of life  
11 after cochlear implantation and changes in individual complaints. *Clin Otolaryngol*  
12 2008;33:427-434.
- 13 39. Godefroy WP, Kaptein AA, Vogel JJ, van der Mey AG. Conservative treatment of  
14 vestibular schwannoma: A follow-up study on clinical and quality-of-life outcome. *Otol*  
15 *Neurotol* 2009.
- 16 40. Presta LG, Chen H, O'Connor SJ, et al. Humanization of an anti-vascular endothelial  
17 growth factor monoclonal antibody for the therapy of solid tumors and other disorders *Cancer*  
18 *Res* 1997;57:4593-4599.
- 19 41. Avastin™ (bevacizumab) investigator's brochure. 2007.
- 20 42. Kim KJ, Li B, Winer J, et al. Inhibition of vascular endothelial growth factor-induced  
21 angiogenesis suppresses tumour growth in vivo *Nature* 1993;362:841-844.
- 22 43. Yuan F, Chen Y, Dellian M, Safabakhsh N, Ferrara N, Jain RK. Time-dependent vascular  
23 regression and permeability changes in established human tumor xenografts induced by an

1 anti-vascular endothelial growth factor/vascular permeability factor antibody. Proc Natl Acad  
2 Sci U S A 1996;93:14765-14770.

3 44. Borgstrom P, Gold DP, Hillan KJ, Ferrara N. Importance of VEGF for breast cancer  
4 angiogenesis in vivo: Implications from intravital microscopy of combination treatments with  
5 an anti-VEGF neutralizing monoclonal antibody and doxorubicin Anticancer Res  
6 1999;19:4203-4214.

7 45. Kabbinavar F, Wong JT, Ayala RE. The effect of antibody to vascular endothelial growth  
8 factor and cisplatin on the growth of lung tumors in nude mice Proc Am Assoc Cancer Res  
9 1995;36:488. Abstract.

10 46. Bergers G, Song S, Meyer-Morse N, Bergsland E, Hanahan D. Benefits of targeting both  
11 pericytes and endothelial cells in the tumor vasculature with kinase inhibitors J Clin Invest  
12 2003;111:1287-1295.

13 47. Shaheen RM, Ahmad SA, Liu W, et al. Inhibited growth of colon cancer carcinomatosis by  
14 antibodies to vascular endothelial and epidermal growth factor receptors Br J Cancer  
15 2001;85:584-589.

16 48. Cobleigh MA, Langmuir VK, Sledge GW, et al. A phase I/II dose-escalation trial of  
17 bevacizumab in previously treated metastatic breast cancer. Semin Oncol 2003;30:117-124.

18 49. Hurwitz H, Fehrenbacher L, Novotny W, et al. Bevacizumab plus irinotecan, fluorouracil,  
19 and leucovorin for metastatic colorectal cancer N Engl J Med 2004;350:2335-2342.

20 50. Giantonio BJ, Catalano PJ, Meropol NJ, et al. Bevacizumab in combination with  
21 oxaliplatin, fluorouracil, and leucovorin (FOLFOX4) for previously treated metastatic  
22 colorectal cancer: Results from the eastern cooperative oncology group study E3200 J Clin  
23 Oncol 2007;25:1539-1544.



- 1 51. Miller KD, Wang M, Gralow J, Dickler M. E2100: A randomized phase III trial of  
2 paclitaxel versus paclitaxel plus bevacizumab as first-line therapy for locally recurrent or  
3 metastatic breast cancer. *Journal of Clinical Oncology* 2005;23Abstract.
- 4 52. Kindler HL, Niedzwiecki D, Hollis D. A double-blind, placebo-controlled, randomized  
5 phase III trial of gemcitabine (G) plus bevacizumab (B) versus gemcitabine plus placebo (P) in  
6 patients (pts) with advanced pancreatic cancer (PC): A preliminary analysis of cancer and  
7 leukemia group B (CALGB) 80303 *Proc Gastrointestinal Cancer Symp* 2007;A:108. Abstract.
- 8 53. Yang JC, Haworth L, Sherry RM, et al. A randomized trial of bevacizumab, an anti-  
9 vascular endothelial growth factor antibody, for metastatic renal cancer *N Engl J Med*  
10 2003;349:427-434.
- 11 54. Bender JL, Adamson PC, Reid JM, et al. Phase I trial and pharmacokinetic study of  
12 bevacizumab in pediatric patients with refractory solid tumors: A children's oncology group  
13 study *J Clin Oncol* 2008;26:399-405.
- 14 55. Chobanian AV, Bakris GL, Black HR, et al. The seventh report of the joint national  
15 committee on prevention, detection, evaluation, and treatment of high blood pressure: The JNC  
16 7 report *JAMA* 2003;289:2560-2572.
- 17 56. Johnson DH, Fehrenbacher L, Novotny WF, et al. Randomized phase II trial comparing  
18 bevacizumab plus carboplatin and paclitaxel  
19 with carboplatin and paclitaxel alone in previously untreated locally advanced or  
20 metastatic non-small-cell lung cancer. *J Clin Oncol* 2004;22:2184-2191.
- 21 57. Skillings JR, Johnson DH, Miller K. Arterial thromboembolic events (ATEs) in a pooled  
22 analysis of 5 randomized, controlled trials (RCTs) of bevacizumab (BV) with chemotherapy  
23 *Proc ASCO* 2005;24:3019. Abstract.

- 1 58. Scappaticci FA, Fehrenbacher L, Cartwright T, et al. Surgical wound healing complications  
2 in metastatic colorectal cancer patients treated with bevacizumab *J Surg Oncol* 2005;91:173-  
3 180.
- 4 59. Wedam SB, Low JA, Yang SX, et al. Antiangiogenic and antitumor effects of bevacizumab  
5 in patients with inflammatory and locally advanced breast cancer *J Clin Oncol* 2006;24:769-  
6 777.
- 7 60. DAdamo DR, Anderson SE, Albritton K, et al. Phase II study of doxorubicin and  
8 bevacizumab for patients with metastatic soft-tissue sarcomas. *J Clin Oncol* 2005;23:7135-  
9 7142.
- 10 61. Glusker P, Recht L, Lane B. Reversible posterior leukoencephalopathy syndrome and  
11 bevacizumab *N Engl J Med* 2006;354:980-982.
- 12 62. Ozcan C, Wong SJ, Hari P. Reversible posterior leukoencephalopathy syndrome and  
13 bevacizumab. *N Engl J Med* 2006;354:980-982.
- 14 63. Sandler A, Gray R, Perry MC, et al. Paclitaxel-carboplatin alone or with bevacizumab for  
15 non-small-cell lung cancer *N Engl J Med* 2006;355:2542-2550.
- 16 64. Hicklin DJ, Ellis LM. Role of the vascular endothelial growth factor pathway in tumor  
17 growth and angiogenesis *J Clin Oncol* 2005;23:1011-1027.
- 18 65. di Tomaso E, Stemmer-Rachamimov A, Drottar M, Jain RK, Plotkin S. Angiogenic profile  
19 in sporadic and NF2-related schwannomas Children's Tumor Foundation Neurofibromatosis  
20 Conference 2007Abstract.
- 21 66. di Tomaso E, Stemmer-Rachamimov A, Potts A, Drottar M, Jain RK, Plotkin SR.  
22 Correlation between VEGF expression and MVD in sporadic and NF2-related schwannomas  
23 *Journal of Clinical Oncology* 2007;25:95a. Abstract.

- 1 67. Jain RK. Normalization of tumor vasculature: An emerging concept in antiangiogenic  
2 therapy. *Science* 2005;307:58-62.
- 3 68. Pope WB, Lai A, Nghiemphu P, Mischel P, Cloughesy TF. MRI in patients with high-  
4 grade gliomas treated with bevacizumab and chemotherapy *Neurology* 2006;66:1258-1260.
- 5 69. di Tomaso E, Stemmer-Rachamimov A, Padera TP, Jain RK, Plotkin SR. Preliminary  
6 success with antiangiogenic therapy in NF2-related tumors *Children's Tumor Foundation*  
7 *Neurofibromatosis Conference 2008* Abstract.
- 8 70. Kunkel P, Ulbricht U, Bohlen P, et al. Inhibition of glioma angiogenesis and growth in vivo  
9 by systemic treatment with a monoclonal antibody against vascular endothelial growth factor  
10 receptor-2. *Cancer Res* 2001;61:6624-6628.
- 11 71. Rafii S, Lyden D, Benezra R, Hattori K, Heissig B. Vascular and haematopoietic stem  
12 cells: Novel targets for anti-angiogenesis therapy? *Nat Rev Cancer* 2002;2:826-835.
- 13 72. Duda DG, Fukumura D, Jain RK. Role of eNOS in neovascularization: NO for endothelial  
14 progenitor cells *Trends Mol Med* 2004;10:143-145.
- 15 73. Brower V. Evidence of efficacy: Researchers investigating markers for angiogenesis  
16 inhibitors. *J Natl Cancer Inst* 2003;95:1425-1427.
- 17 74. Willett CG, Duda DG, Xu L, et al. Correlation of blood and physiologic markers with  
18 effect of bevacizumab (BV) with chemoradiation therapy in rectal cancer (RC) *Journal of*  
19 *Clinical Oncology* 2008;26:202s. Abstract.
- 20 75. Barck KH, Willis B, Ross J, French DM, Filvaroff EH, Carano RA. Viable tumor tissue  
21 detection in murine metastatic breast cancer by whole-body MRI and multispectral analysis.  
22 *Magn Reson Med* 2009.
- 23 76. Potthast S, Schulte A, Kos S, Aschwanden M, Bilecen D. Blood oxygenation level-

1 dependent MRI of the skeletal muscle during ischemia in patients with peripheral arterial  
2 occlusive disease. *Rofo* 2009.

3 77. Ludescher B, Machann J, Eschweiler GW, et al. Correlation of fat distribution in whole  
4 body MRI with generally used anthropometric data. *Invest Radiol* 2009;44:712-719.

5 78. Gerber HP, Ferrara N. Angiogenesis and bone growth. *Trends in cardiovascular medicine*  
6 2000;10:223-228.

7 79. Genentech I. Investigator brochure bevacizumab  
8 . 2002.

9 80. Gerber HP, Vu TH, Ryan AM, Kowalski J, Werb Z, Ferrara N. VEGF couples  
10 hypertrophic cartilage remodeling, ossification and angiogenesis during endochondral bone  
11 formation *Nature Medicine* 1999;5:623-628.

12 81. Bayer PC. Investigator's brochure BAY 43-9006. 2003.

13 82. Baser ME, Friedman JM, Wallace AJ, Ramsden RT, Joe H, Evans DG. Evaluation of  
14 clinical diagnostic criteria for neurofibromatosis 2 *Neurology* 2002;59:1759-1765.

15 83. Hazra R, Gafni RI, Maldarelli F, et al. Tenofovir disoproxil fumarate and an optimized  
16 background regimen of antiretroviral agents as salvage therapy for pediatric HIV infection  
17 *Pediatrics* 2005;116:e846-e854.

18 84. Gafni RI, Hazra R, Reynolds JC, et al. Tenofovir disoproxil fumarate and an optimized  
19 background regimen of antiretroviral agents as salvage therapy: Impact on bone mineral  
20 density in HIV-infected children. *Pediatrics* 2006;118:e711-e718.

21 85. Mancuso P, Burlini A, Pruneri G, Goldhirsch A, Martinelli G, Bertolini F. Resting and  
22 activated endothelial cells are increased in the peripheral blood of cancer patients. *Blood*  
23 2001;97:3658-3661.

- 1 86. Therasse P, Arbuck SG, Eisenhauer EA, et al. New guidelines to evaluate the response to  
2 treatment in solid tumors. european organization for research and treatment of cancer, national  
3 cancer institute of the united states, national cancer institute of canada J Natl Cancer Inst  
4 2000;92:205-216.
- 5 87. Macdonald DR, Cascino TL, Schold SC J, Cairncross JG. Response criteria for phase II  
6 studies of supratentorial malignant glioma J Clin Oncol 1990;8:1277-1280.
- 7 88. van der Kouwe AJ, Benner T, Fischl B, et al. On-line automatic slice positioning for brain  
8 MR imaging Neuroimage 2005;27:222-230.
- 9 89. Benner T, Wisco JJ, van der Kouwe AJ, et al. Comparison of manual and automatic section  
10 positioning of brain MR images Radiology 2006;239:246-254.
- 11 90. Ostergaard L, Sorensen AG, Kwong KK, Weisskoff RM, Gyldensted C, Rosen BR. High  
12 resolution measurement of cerebral blood flow using intravascular tracer bolus passages. part  
13 II: Experimental comparison and preliminary results Magn Reson Med 1996;36:726-736.
- 14 91. Boxerman JL, Schmainda KM, Weisskoff RM. Relative cerebral blood volume maps  
15 corrected for contrast agent extravasation significantly correlate with glioma tumor grade,  
16 whereas uncorrected maps do not. AJNR Am J Neuroradiol 2006;27:859-867.
- 17 92. Dennie J, Mandeville JB, Boxerman JL, Packard SD, Rosen BR, Weisskoff RM. NMR  
18 imaging of changes in vascular morphology due to tumor angiogenesis Magn Reson Med  
19 1998;40:793-799.
- 20 93. Pathak AP, Schmainda KM, Ward BD, Linderman JR, Rebro KJ, Greene AS. MR-derived  
21 cerebral blood volume maps: Issues regarding histological validation and assessment of tumor  
22 angiogenesis. Magn Reson Med 2001;46:735-747.
- 23 94. Schmainda KM, Rand SD, Joseph AM, et al. Characterization of a first-pass gradient-echo

- 1 spin-echo method to predict brain tumor grade and angiogenesis *Am J Neuroradiol*  
2 2004;25:1524-1532.
- 3 95. Tofts PS, Brix G, Buckley DL, et al. Estimating kinetic parameters from dynamic contrast-  
4 enhanced T(1)-weighted MRI of a diffusable tracer: Standardized quantities and symbols *J*  
5 *Magn Reson Imaging* 1999;10:223-232.
- 6 96. American National Standards Institute. National standard specification for audiometers  
7 1996;S3.6.
- 8 97. American National Standards Institute. Criteria for permissible ambient noise during  
9 audiometric testing 1991;S3.1.
- 10 98. Hughson W, Westlake H. Manual for program outline for rehabilitation of aural casualties  
11 both military and civilian *Trans Am Acad Ophthalmol Otolaryngol* 1944;48:1-15.
- 12 99. Carhart R, Jerger J. Preferred method for clinical determination of pure tone thresholds *J*  
13 *Speech Hear Disord* 1959;24:330-345.
- 14 100. American Speech-Language-Hearing Association. Guidelines for audiometric symbols  
15 ASHA 1990;2:25-30.
- 16 101. Studebaker GA. Clinical masking of the nontest ear *J Speech Hear Disord* 1967;32:360-  
17 371.
- 18 102. Hood JD. The principles and practice of bone conduction audiometry: A review of the  
19 present position *Laryngoscope* 1960;70:1211-1228.
- 20 103. Frank T, Vavrek MJ. Reference threshold levels for an ER-3A insert earphone. *J Am*  
21 *Acad Audiol* 1992;3:51-59.
- 22 104. Hirsh IJ, Davis H, Silveman SR, Reynolds EG, Eldert E, Benson RW. Development of  
23 materials for speech audiometry *J Speech Hear Disord* 1952;17:321-337.

- 1 105. Halpin C, Thornton AR. Q/MASS volume 2: Recording of speech audiometry materials.  
2 1991.
- 3 106. Fletcher H. A method of calculating hearing loss for speech from an audiogram. *Acta*  
4 *Otolaryngol Suppl* 1950;90:26-37.
- 5 107. Halpin C, Thornton A, Hou Z. The articulation index in clinical diagnosis and hearing  
6 aids. *Curr Opin Otolaryngol* 1996;4:325-334.
- 7 108. Humes LE, Riker S. Evaluation of two clinical versions of the articulation index *Ear Hear*  
8 1992;13:406-409.
- 9 109. The Harvard Audiometry Operating System. Palo Alto, CA: Applitech, Inc., 1994.
- 10 110. Fletcher H. *Speech and Hearing*. New York: Van Nostrand-Reinhold, 1929.
- 11 111. ONeil E, Hou Z, Thornton A. The articulation index and word recognition in hearing  
12 impaired participants. *ASHA* 1993;35:222.
- 13 112. Fletcher H. *Speech and Hearing in Communication*. Princeton, NJ: Van Nostrand, 1953.
- 14 113. Moore BCJ. *Cochlear Hearing Loss*. London: Whurr, 1998.
- 15 114. Konkle D, Berry G. *Masking in Speech Audiometry*. Baltimore: University Park Press,  
16 1983.
- 17 115. Han Y, Thornton A, Halpin C. Expert-system decision support for clinical pure tone  
18 masking. *ASHA* 1994;36:106.
- 19 116. American National Standards Institute. *Methods for manual pure tone threshold*  
20 *audiometry*. 1978;S3.21.
- 21 117. International Organization for Standardization. *Acoustics-reference zero for calibration of*  
22 *audiometric equipment-part2: Reference equivalent threshold sound for pure tones and insert*  
23 *earphones* 1994;ISO 389-2.

1 118. Carhart R. Speech audiometry in clinical evaluation Acta Otolaryngol 1952;41:18-48.

2 119. Altshuler MW. The stenger phenomenon. Journal of Communication Disorders

3 1970;3:89-105.

4 Walter J, Kuhn SA, Brodhun M, Reichart R, Kalff R. Pulmonary meningioma and  
5 neurinoma associated with multiple CNS tumours in a patient with  
6 neurofibromatosis type 2. Clin Neurol Neurosurg. 2009 Jun;111(5):454-9.

7  
8 Harada H, Kumon Y, Hatta N, Sakaki S, Ohta S. Neurofibromatosis type 2 with  
9 multiple primary brain tumors in monozygotic twins. Surg Neurol. 1999  
10 May;51(5):528-35.

11

12 Nunes F, MacCollin M. Neurofibromatosis 2 in the pediatric population. J Child

13 Neurol. 2003 Oct;18(10):718-24.

14

15

16

#### References

17 1. CBTRUS.

18 Statistical report: Primary brain tumors in the united states, 1998-2002. Published by the

19 Central Brain Tumor Registry of the United States. 2005.

20 2. Otsuka G, Saito K, Nagatani T, Yoshida J. Age at symptom onset and long-term survival in  
21 patients with neurofibromatosis type 2. J Neurosurg 2003;99:480-483.

22 3. Badie B, Pyle GM, Nguyen PH, Hadar EJ. Elevation of internal auditory canal pressure by  
23 vestibular schwannomas. Otol Neurotol 2001;22:696-700.

24 4. Driscoll CL, Jackler RK, Pitts LH, Brackmann DE. Lesions of the internal auditory canal  
25 and cerebellopontine angle in an only hearing ear: Is surgery ever advisable? Am J Otol  
26 2000;21:573-581.

27 5. Evans DGR, Birch JM, Ramsden RT, Sharif S, Baser ME. Malignant transformation and

28 new primary tumours after therapeutic radiation for benign disease: Substantial risks in certain



- 1 tumour prone syndromes. *J Med Genet* 2006;43:289-294.
- 2 6. Baser ME, Evans DG, Jackler RK, Sujansky E, Rubenstein A. Neurofibromatosis 2,  
3 radiosurgery and malignant nervous system tumours. *Br J Cancer* 2000;82:998.
- 4 7. Carlson ML, Babovic-Vuksanovic D, Messiaen L, Scheithauer BW, Neff BA, Link MJ.  
5 Radiation-induced rhabdomyosarcoma of the brainstem in a patient with neurofibromatosis  
6 type 2. *J Neurosurg* 2010;112:81-87.
- 7 8. Bari ME, Forster DM, Kemeny AA, Walton L, Hardy D, Anderson JR. Malignancy in a  
8 vestibular schwannoma. report of a case with central neurofibromatosis, treated by both  
9 stereotactic radiosurgery and surgical excision, with a review of the literature. *Br J Neurosurg*  
10 2002;16:284-289.
- 11 9. Thomsen J, Mirz F, Wetke R, Astrup J, Bojsen-Møller M, Nielsen E. Intracranial sarcoma in  
12 a patient with neurofibromatosis type 2 treated with gamma knife radiosurgery for vestibular  
13 schwannoma. *Am J Otol* 2000;21:364-370.
- 14 10. Shamisa A, Bance M, Nag S, et al. Glioblastoma multiforme occurring in a patient treated  
15 with gamma knife surgery. case report and review of the literature. *J Neurosurg* 2001;94:816-  
16 821.
- 17 11. Ho SY, Kveton JF.  
18 Rapid growth of acoustic neuromas after stereotactic radiotherapy in type 2 neurofibromatosis.  
19 *Ear Nose Throat J* 2002;81:831-833.
- 20 12. Balasubramaniam A, Shannon P, Hodaie M, Laperriere N, Michaels H, Guha A.  
21 Glioblastoma multiforme after stereotactic radiotherapy for acoustic neuroma: Case report and  
22 review of the literature. *Neuro Oncol* 2007;9:447-453.
- 23 13. Mathieu D, Kondziolka D, Flickinger JC, et al. Stereotactic radiosurgery for vestibular

1 schwannomas in patients with neurofibromatosis type 2: An analysis of tumor control,  
2 complications, and hearing preservation rates. *Neurosurgery* 2007;60:460-468.

3 14. Plotkin SR, Stemmer-Rachamimov AO, Barker FG, 2nd, et al. Hearing improvement after  
4 bevacizumab in patients with neurofibromatosis type 2. *N Engl J Med* 2009;361:358-367.

5 15. Evans DGR, Birch JM, Ramsden RT. Paediatric presentation of type 2 neurofibromatosis.  
6 *Arch Dis Child* 1999;81:496-499.

7 16. Evans DG. Neurofibromatosis type 2 (NF2): A clinical and molecular review. *Orphanet J*  
8 *Rare Dis* 2009;4:16.

9 17. Mautner VF, Tatagiba M, Guthoff R, Samii M, Pulst SM. Neurofibromatosis 2 in the  
10 pediatric age group. *Neurosurgery* 1993;33:92-96.

11 18. Ruggieri M, Iannetti P, Polizzi A, et al. Earliest clinical manifestations and natural history  
12 of neurofibromatosis type 2 (NF2) in childhood: A study of 24 patients. *Neuropediatrics*  
13 2005;36:21-34.

14 19. Walter J, Kuhn SA, Brodhun M, Reichart R, Kalff R. Pulmonary meningioma and  
15 neurinoma associated with multiple CNS tumours in a patient with neurofibromatosis type 2.  
16 *Clin Neurol Neurosurg* 2009;111:454-459.

17 20. Harada H, Kumon Y, Hatta N, Sakaki S, Ohta S. Neurofibromatosis type 2 with multiple  
18 primary brain tumors in monozygotic twins. *Surg Neurol* 2000;53:95-96.

19 21. Nunes F, MacCollin M. Neurofibromatosis 2 in the pediatric population. *J Child Neurol*  
20 2003;18:718-724.

21 22. Mahmud MR, Khan AM, Nadol JB J. Histopathology of the inner ear in unoperated  
22 acoustic neuroma. *Ann Otol Rhinol Laryngol* 2003;112:979-986.

23 23. Thornton AR, Raffin MJ. Speech-discrimination scores modeled as a binomial variable. *J*

- 1 Speech Hear Res 1978;21:507-518.
- 2 24. Halpin C, Rauch SD. Using audiometric thresholds and word recognition in a treatment  
3 study. *Otol Neurotol* 2006;27:110-116.
- 4 25. American Academy of Otolaryngology-Head and Neck Surgery Foundation, INC.  
5 Committee on hearing and equilibrium guidelines for the evaluation of hearing preservation in  
6 acoustic neuroma (vestibular schwannoma). *Otolaryngol Head Neck Surg* 1995;113:179-180.
- 7 26. Harris GJ, Plotkin SR, Maccollin M, et al. Three-dimensional volumetrics for tracking  
8 vestibular schwannoma growth in neurofibromatosis type II. *Neurosurgery* 2008;62:1314-9;  
9 discussion 1319-20.
- 10 27. Solomon J, Warren K, Dombi E, Patronas N, Widemann B. Automated detection and  
11 volume measurement of plexiform neurofibromas in neurofibromatosis 1 using magnetic  
12 resonance imaging. *Comput Med Imaging Graph* 2004;28:257-265.
- 13 28. Babovic-Vuksanovic D, Ballman K, Michels V, et al. Phase II trial of pirfenidone in adults  
14 with neurofibromatosis type 1 *Neurology* 2006;67:1860-1862.
- 15 29. Dombi E, Solomon J, Gillespie AJ, et al. NF1 plexiform neurofibroma growth rate by  
16 volumetric MRI: Relationship to age and body weight *Neurology* 2007;68:643-647.
- 17 30. Jackson A, Kassner A, Zhu XP, Li KL. Reproducibility of T2\* blood volume and vascular  
18 tortuosity maps in cerebral gliomas *J Magn Reson Imaging* 2001;14:510-516.
- 19 31. Zhu XP, Li KL, Kamaly-Asl ID, et al. Quantification of endothelial permeability, leakage  
20 space, and blood volume in brain tumors using combined T1 and T2\* contrast-enhanced  
21 dynamic MR imaging. *J Magn Reson Imaging* 2000;11:575-585.
- 22 32. Medved M, Karczmar G, Yang C, et al. Semiquantitative analysis of dynamic contrast  
23 enhanced MRI in cancer patients: Variability and changes in tumor tissue over time. *J Magn*

- 1 Reson Imaging 2004;20:122-128.
- 2 33. Akella NS, Twieg DB, Mikkelsen T, et al. Assessment of brain tumor angiogenesis  
3 inhibitors using perfusion magnetic resonance imaging: Quality and analysis results of a phase  
4 I trial. J Magn Reson Imaging 2004;20:913-922.
- 5 34. Batchelor TT, Sorensen AG, di Tomaso E, et al. AZD2171, a pan-VEGF receptor tyrosine  
6 kinase inhibitor, normalizes tumor vasculature and alleviates edema in glioblastoma patients.  
7 Cancer Cell 2007;11:83-95.
- 8 35. Willett CG, Boucher Y, di Tomaso E, et al. Direct evidence that the VEGF-specific  
9 antibody bevacizumab has antivasculature effects in human rectal cancer Nat Med 2004;10:145-  
10 147.
- 11 36. Willett CG, Boucher Y, Duda DG, et al. Surrogate markers for antiangiogenic therapy and  
12 dose-limiting toxicities for bevacizumab with radiation and chemotherapy: Continued  
13 experience of a phase I trial in rectal cancer patients J Clin Oncol 2005;23:8136-8139.
- 14 37. Zhu AX, Sahani DV, di Tomaso E, et al. Sunitinib monotherapy in patients with advanced  
15 hepatocellular carcinoma (HCC): Insights from a multidisciplinary phase II study Journal of  
16 Clinical Oncology 2008;26:218s. Abstract.
- 17 38. Duda DG, Cohen KS, Ancukiewicz M, et al. A comparative study of circulating endothelial  
18 cells (CECs) and circulating progenitor cells (CPCs) kinetics in four multidisciplinary phase II  
19 studies of antiangiogenic agents. Journal of Clinical Oncology 2008;26:164s. Abstract.
- 20 39. Dorrell MI, Aguilar E, Schepke L, Barnett FH, Friedlander M. Combination angiostatic  
21 therapy completely inhibits ocular and tumor angiogenesis. Proc Natl Acad Sci U S A  
22 2007;104:967-972.
- 23 40. Ferrara N, Damico L, Shams N, Lowman H, Kim R. Development of ranibizumab, an anti-

1 vascular endothelial growth factor antigen binding fragment, as therapy for neovascular age-  
2 related macular degeneration. *Retina* 2006;26:859-870.

3 41. Cai W, Kassarian A, Bredella MA, et al. Tumor burden in patients with neurofibromatosis  
4 types 1 and 2 and schwannomatosis: Determination on whole-body MR images. *Radiology*  
5 2009;250:665-673.

6 42. Baser ME, Kuramoto L, Joe H, et al. Genotype-phenotype correlations for nervous system  
7 tumors in neurofibromatosis 2: A population-based study *Am J Hum Genet* 2004;75:231-239.

8 43. Dalgorf DM, Rowsell C, Bilbao JM, Chen JM. Immunohistochemical investigation of  
9 hormone receptors and vascular endothelial growth factor concentration in vestibular  
10 schwannoma. *Skull Base* 2008;18:377-384.

11 44. Koutsimpelas D, Stripf T, Heinrich UR, Mann WJ, Brieger J. Expression of vascular  
12 endothelial growth factor and basic fibroblast growth factor in sporadic vestibular  
13 schwannomas correlates to growth characteristics. *Otol Neurotol* 2007;28:1094-1099.

14 45. Caye-Thomasen P, Baandrup L, Jacobsen GK, Thomsen J, Stangerup SE.  
15 Immunohistochemical demonstration of vascular endothelial growth factor in vestibular  
16 schwannomas correlates to tumor growth rate. *Laryngoscope* 2003;113:2129-2134.

17 46. Wasa J, Nishida Y, Suzuki Y, et al. Differential expression of angiogenic factors in  
18 peripheral nerve sheath tumors. *Clin Exp Metastasis* 2008;25:819-825.

19 47. Nakayama T, Cho YC, Mine Y, et al. Expression of vascular endothelial growth factor and  
20 its receptors VEGFR-1 and 2 in gastrointestinal stromal tumors, leiomyomas and  
21 schwannomas *World J Gastroenterol* 2006;12:6182-6187.

22 48. Saito K, Kato M, Susaki N, Nagatani T, Nagasaka T, Yoshida J. Expression of ki-67  
23 antigen and vascular endothelial growth factor in sporadic and neurofibromatosis type 2-

1 associated schwannomas. *Clin Neuropathol* 2003;22:30-34.

2 49. Evans DG, Baser ME, O'Reilly B, et al. Management of the patient and family with  
3 neurofibromatosis 2: A consensus conference statement. *Br J Neurosurg* 2005;19:5-12.

4 50. Slattery WH,3rd, Fisher LM, Iqbal Z, Oppenhiemer M. Vestibular schwannoma growth  
5 rates in neurofibromatosis type 2 natural history consortium subjects. *Otol Neurotol*  
6 2004;25:811-817.

7 51. Mosges R, Koberlein J, Erdtracht B, Klingel R, RHEO-ISHL Study Group. Quality of life  
8 in patients with idiopathic sudden hearing loss: Comparison of different therapies using the  
9 medical outcome short form (36) health survey questionnaire. *Otol Neurotol* 2008;29:769-775.

10 52. Poissant SF, Beaudoin F, Huang J, Brodsky J, Lee DJ. Impact of cochlear implantation on  
11 speech understanding, depression, and loneliness in the elderly. *J Otolaryngol Head Neck Surg*  
12 2008;37:488-494.

13 53. Zhao F, Bai Z, Stephens D. The relationship between changes in self-rated quality of life  
14 after cochlear implantation and changes in individual complaints. *Clin Otolaryngol*  
15 2008;33:427-434.

16 54. Godefroy WP, Kaptein AA, Vogel JJ, van der Mey AG. Conservative treatment of  
17 vestibular schwannoma: A follow-up study on clinical and quality-of-life outcome. *Otol*  
18 *Neurotol* 2009.

19 55. Presta LG, Chen H, O'Connor SJ, et al. Humanization of an anti-vascular endothelial  
20 growth factor monoclonal antibody for the therapy of solid tumors and other disorders *Cancer*  
21 *Res* 1997;57:4593-4599.

22 56. Kim KJ, Li B, Winer J, et al. Inhibition of vascular endothelial growth factor-induced  
23 angiogenesis suppresses tumour growth in vivo *Nature* 1993;362:841-844.

- 1 57. Avastin™ (bevacizumab) investigator's brochure. 2007.
- 2 58. Yuan F, Chen Y, Dellian M, Safabakhsh N, Ferrara N, Jain RK. Time-dependent vascular  
3 regression and permeability changes in established human tumor xenografts induced by an  
4 anti-vascular endothelial growth factor/vascular permeability factor antibody. Proc Natl Acad  
5 Sci U S A 1996;93:14765-14770.
- 6 59. Borgstrom P, Gold DP, Hillan KJ, Ferrara N. Importance of VEGF for breast cancer  
7 angiogenesis in vivo: Implications from intravital microscopy of combination treatments with  
8 an anti-VEGF neutralizing monoclonal antibody and doxorubicin Anticancer Res  
9 1999;19:4203-4214.
- 10 60. Kabbinavar F, Wong JT, Ayala RE. The effect of antibody to vascular endothelial growth  
11 factor and cisplatin on the growth of lung tumors in nude mice Proc Am Assoc Cancer Res  
12 1995;36:488. Abstract.
- 13 61. Bergers G, Song S, Meyer-Morse N, Bergsland E, Hanahan D. Benefits of targeting both  
14 pericytes and endothelial cells in the tumor vasculature with kinase inhibitors J Clin Invest  
15 2003;111:1287-1295.
- 16 62. Shaheen RM, Ahmad SA, Liu W, et al. Inhibited growth of colon cancer carcinomatosis by  
17 antibodies to vascular endothelial and epidermal growth factor receptors Br J Cancer  
18 2001;85:584-589.
- 19 63. Cobleigh MA, Langmuir VK, Sledge GW, et al. A phase I/II dose-escalation trial of  
20 bevacizumab in previously treated metastatic breast cancer. Semin Oncol 2003;30:117-124.
- 21 64. Hurwitz H, Fehrenbacher L, Novotny W, et al. Bevacizumab plus irinotecan, fluorouracil,  
22 and leucovorin for metastatic colorectal cancer N Engl J Med 2004;350:2335-2342.
- 23 65. Giantonio BJ, Catalano PJ, Meropol NJ, et al. Bevacizumab in combination with

1 oxaliplatin, fluorouracil, and leucovorin (FOLFOX4) for previously treated metastatic  
2 colorectal cancer: Results from the eastern cooperative oncology group study E3200 J Clin  
3 Oncol 2007;25:1539-1544.

4 66. Miller KD, Wang M, Gralow J, Dickler M. E2100: A randomized phase III trial of  
5 paclitaxel versus paclitaxel plus bevacizumab as first-line therapy for locally recurrent or  
6 metastatic breast cancer. Journal of Clinical Oncology 2005;23Abstract.

7 67. Kindler HL, Niedzwiecki D, Hollis D. A double-blind, placebo-controlled, randomized  
8 phase III trial of gemcitabine (G) plus bevacizumab (B) versus gemcitabine plus placebo (P) in  
9 patients (pts) with advanced pancreatic cancer (PC): A preliminary analysis of cancer and  
10 leukemia group B (CALGB) 80303 Proc Gastrointestinal Cancer Symp 2007;A:108. Abstract.

11 68. Yang JC, Haworth L, Sherry RM, et al. A randomized trial of bevacizumab, an anti-  
12 vascular endothelial growth factor antibody, for metastatic renal cancer N Engl J Med  
13 2003;349:427-434.

14 69. Glade Bender JL, Adamson PC, Reid JM, et al. Phase I trial and pharmacokinetic study of  
15 bevacizumab in pediatric patients with refractory solid tumors: A children's oncology group  
16 study. J Clin Oncol 2008;26:399-405.

17 70. Benesch M, Windelberg M, Sauseng W, et al. Compassionate use of bevacizumab (avastin)  
18 in children and young adults with refractory or recurrent solid tumors. Ann Oncol  
19 2008;19:807-813.

20 71. Packer RJ, Jakacki R, Horn M, et al. Objective response of multiply recurrent low-grade  
21 gliomas to bevacizumab and irinotecan. Pediatr Blood Cancer 2009;52:791-795.

22 72. Modak S, Cheung NK. Neuroblastoma: Therapeutic strategies for a clinical enigma. Cancer  
23 Treat Rev 2010;Mar 11.



- 1 73. Liu AK, Macy ME, Foreman NK. Bevacizumab as therapy for radiation necrosis in four  
2 children with pontine gliomas. *Int J Radiat Oncol Biol Phys* 2009;75:1148-1154.
- 3 74. Chobanian AV, Bakris GL, Black HR, et al. The seventh report of the joint national  
4 committee on prevention, detection, evaluation, and treatment of high blood pressure: The JNC  
5 7 report *JAMA* 2003;289:2560-2572.
- 6 75. Johnson DH, Fehrenbacher L, Novotny WF, et al. Randomized phase II trial comparing  
7 bevacizumab plus carboplatin and paclitaxel  
8 with carboplatin and paclitaxel alone in previously untreated locally advanced or  
9 metastatic non-small-cell lung cancer. *J Clin Oncol* 2004;22:2184-2191.
- 10 76. Skillings JR, Johnson DH, Miller K. Arterial thromboembolic events (ATEs) in a pooled  
11 analysis of 5 randomized, controlled trials (RCTs) of bevacizumab (BV) with chemotherapy  
12 *Proc ASCO* 2005;24:3019. Abstract.
- 13 77. Scappaticci FA, Fehrenbacher L, Cartwright T, et al. Surgical wound healing complications  
14 in metastatic colorectal cancer patients treated with bevacizumab *J Surg Oncol* 2005;91:173-  
15 180.
- 16 78. Wedam SB, Low JA, Yang SX, et al. Antiangiogenic and antitumor effects of bevacizumab  
17 in patients with inflammatory and locally advanced breast cancer *J Clin Oncol* 2006;24:769-  
18 777.
- 19 79. DAdamo DR, Anderson SE, Albritton K, et al. Phase II study of doxorubicin and  
20 bevacizumab for patients with metastatic soft-tissue sarcomas. *J Clin Oncol* 2005;23:7135-  
21 7142.
- 22 80. Glusker P, Recht L, Lane B. Reversible posterior leukoencephalopathy syndrome and  
23 bevacizumab *N Engl J Med* 2006;354:980-982.

- 1 81. Ozcan C, Wong SJ, Hari P. Reversible posterior leukoencephalopathy syndrome and  
2 bevacizumab. *N Engl J Med* 2006;354:980-982.
- 3 82. Sandler A, Gray R, Perry MC, et al. Paclitaxel-carboplatin alone or with bevacizumab for  
4 non-small-cell lung cancer *N Engl J Med* 2006;355:2542-2550.
- 5 83. Hicklin DJ, Ellis LM. Role of the vascular endothelial growth factor pathway in tumor  
6 growth and angiogenesis *J Clin Oncol* 2005;23:1011-1027.
- 7 84. di Tomaso E, Stemmer-Rachamimov A, Drottar M, Jain RK, Plotkin S. Angiogenic profile  
8 in sporadic and NF2-related schwannomas Children's Tumor Foundation Neurofibromatosis  
9 Conference 2007Abstract.
- 10 85. di Tomaso E, Stemmer-Rachamimov A, Potts A, Drottar M, Jain RK, Plotkin SR.  
11 Correlation between VEGF expression and MVD in sporadic and NF2-related schwannomas  
12 *Journal of Clinical Oncology* 2007;25:95a. Abstract.
- 13 86. Jain RK. Normalization of tumor vasculature: An emerging concept in antiangiogenic  
14 therapy. *Science* 2005;307:58-62.
- 15 87. Pope WB, Lai A, Nghiemphu P, Mischel P, Cloughesy TF. MRI in patients with high-  
16 grade gliomas treated with bevacizumab and chemotherapy. *Neurology* 2006;66:1258-1260.
- 17 88. di Tomaso E, Stemmer-Rachamimov A, Padera TP, Jain RK, Plotkin SR. Preliminary  
18 success with antiangiogenic therapy in NF2-related tumors Children's Tumor Foundation  
19 Neurofibromatosis Conference 2008Abstract.
- 20 89. Kunkel P, Ulbricht U, Bohlen P, et al. Inhibition of glioma angiogenesis and growth in vivo  
21 by systemic treatment with a monoclonal antibody against vascular endothelial growth factor  
22 receptor-2. *Cancer Res* 2001;61:6624-6628.
- 23 90. Rafii S, Lyden D, Benezra R, Hattori K, Heissig B. Vascular and haematopoietic stem

1 cells: Novel targets for anti-angiogenesis therapy? Nat Rev Cancer 2002;2:826-835.

2 91. Duda DG, Fukumura D, Jain RK. Role of eNOS in neovascularization: NO for endothelial  
3 progenitor cells Trends Mol Med 2004;10:143-145.

4 92. Brower V. Evidence of efficacy: Researchers investigating markers for angiogenesis  
5 inhibitors. J Natl Cancer Inst 2003;95:1425-1427.

6 93. Willett CG, Duda DG, Xu L, et al. Correlation of blood and physiologic markers with  
7 effect of bevacizumab (BV) with chemoradiation therapy in rectal cancer (RC) Journal of  
8 Clinical Oncology 2008;26:202s. Abstract.

9 94. Barck KH, Willis B, Ross J, French DM, Filvaroff EH, Carano RA. Viable tumor tissue  
10 detection in murine metastatic breast cancer by whole-body MRI and multispectral analysis.  
11 Magn Reson Med 2009.

12 95. Potthast S, Schulte A, Kos S, Aschwanden M, Bilecen D. Blood oxygenation level-  
13 dependent MRI of the skeletal muscle during ischemia in patients with peripheral arterial  
14 occlusive disease. Rofo 2009.

15 96. Ludescher B, Machann J, Eschweiler GW, et al. Correlation of fat distribution in whole  
16 body MRI with generally used anthropometric data. Invest Radiol 2009;44:712-719.

17 97. Gerber HP, Ferrara N. Angiogenesis and bone growth. Trends in cardiovascular medicine  
18 2000;10:223-228.

19 98. Genentech I. Investigator brochure bevacizumab  
20 . 2002.

21 99. Gerber HP, Vu TH, Ryan AM, Kowalski J, Werb Z, Ferrara N. VEGF couples  
22 hypertrophic cartilage remodeling, ossification and angiogenesis during endochondral bone  
23 formation Nature Medicine 1999;5:623-628.

- 1 100. Bayer PC. Investigator's brochure BAY 43-9006. 2003.
- 2 101. Baser ME, Friedman JM, Wallace AJ, Ramsden RT, Joe H, Evans DG. Evaluation of  
3 clinical diagnostic criteria for neurofibromatosis 2 *Neurology* 2002;59:1759-1765.
- 4 102. Hazra R, Gafni RI, Maldarelli F, et al. Tenofovir disoproxil fumarate and an optimized  
5 background regimen of antiretroviral agents as salvage therapy for pediatric HIV infection  
6 *Pediatrics* 2005;116:e846-e854.
- 7 103. Gafni RI, Hazra R, Reynolds JC, et al. Tenofovir disoproxil fumarate and an optimized  
8 background regimen of antiretroviral agents as salvage therapy: Impact on bone mineral  
9 density in HIV-infected children. *Pediatrics* 2006;118:e711-e718.
- 10 104. Mancuso P, Burlini A, Pruneri G, Goldhirsch A, Martinelli G, Bertolini F. Resting and  
11 activated endothelial cells are increased in the peripheral blood of cancer patients. *Blood*  
12 2001;97:3658-3661.
- 13 105. Therasse P, Arbuck SG, Eisenhauer EA, et al. New guidelines to evaluate the response to  
14 treatment in solid tumors. european organization for research and treatment of cancer, national  
15 cancer institute of the united states, national cancer institute of canada *J Natl Cancer Inst*  
16 2000;92:205-216.
- 17 106. Macdonald DR, Cascino TL, Schold SC, Jr, Cairncross JG. Response criteria for phase II  
18 studies of supratentorial malignant glioma. *J Clin Oncol* 1990;8:1277-1280.
- 19 107. American National Standards Institute. National standard specification for audiometers  
20 1996;S3.6.
- 21 108. American National Standards Institute. Criteria for permissible ambient noise during  
22 audiometric testing 1991;S3.1.
- 23 109. Hughson W, Westlake H. Manual for program outline for rehabilitation of aural casualties

- 1 both military and civilian *Trans Am Acad Ophthalmol Otolaryngol* 1944;48:1-15.
- 2 110. Carhart R, Jerger J. Preferred method for clinical determination of pure tone thresholds *J*  
3 *Speech Hear Disord* 1959;24:330-345.
- 4 111. American Speech-Language-Hearing Association. Guidelines for audiometric symbols  
5 *ASHA* 1990;2:25-30.
- 6 112. Studebaker GA. Clinical masking of the nontest ear *J Speech Hear Disord* 1967;32:360-  
7 371.
- 8 113. Hood JD. The principles and practice of bone conduction audiometry: A review of the  
9 present position *Laryngoscope* 1960;70:1211-1228.
- 10 114. Frank T, Vavrek MJ. Reference threshold levels for an ER-3A insert earphone. *J Am*  
11 *Acad Audiol* 1992;3:51-59.
- 12 115. Hirsh IJ, Davis H, Silveman SR, Reynolds EG, Eldert E, Benson RW. Development of  
13 materials for speech audiometry *J Speech Hear Disord* 1952;17:321-337.
- 14 116. Halpin C, Thornton AR. *Q/MASS volume 2: Recording of speech audiometry materials.*  
15 1991.
- 16 117. Fletcher H. A method of calculating hearing loss for speech from an audiogram. *Acta*  
17 *Otolaryngol Suppl* 1950;90:26-37.
- 18 118. Halpin C, Thornton A, Hou Z. The articulation index in clinical diagnosis and hearing  
19 aids. *Curr Opin Otolaryngol* 1996;4:325-334.
- 20 119. Humes LE, Riker S. Evaluation of two clinical versions of the articulation index *Ear Hear*  
21 1992;13:406-409.
- 22 120. *The Harvard Audiometry Operating System.* Palo Alto, CA: Applitech, Inc., 1994.
- 23 121. Fletcher H. *Speech and Hearing.* New York: Van Nostrand-Reinhold, 1929.

- 1 122. ONeil E, Hou Z, Thornton A. The articulation index and word recognition in hearing  
2 impaired participants. ASHA 1993;35:222.
- 3 123. Fletcher H. Speech and Hearing in Communication. Princeton, NJ: Van Nostrand, 1953.
- 4 124. Moore BCJ. Cochlear Hearing Loss. London: Whurr, 1998.
- 5 125. Konkle D, Berry G. Masking in Speech Audiometry. Baltimore: University Park Press,  
6 1983.
- 7 126. Han Y, Thornton A, Halpin C. Expert-system decision support for clinical pure tone  
8 masking. ASHA 1994;36:106.
- 9 127. American National Standards Institute. Methods for manual pure tone threshold  
10 audiometry. 1978;S3.21.
- 11 128. International Organization for Standardization. Acoustics-reference zero for calibration of  
12 audiometric equipment-part2: Reference equivalent threshold sound for pure tones and insert  
13 earphones 1994;ISO 389-2.
- 14 129. Carhart R. Speech audiometry in clinical evaluation Acta Otolaryngol 1952;41:18-48.
- 15 130. Altshuler MW. The stenger phenomenon. Journal of Communication Disorders  
16 1970;3:89-105.
- 17 131. van der Kouwe AJ, Benner T, Fischl B, et al. On-line automatic slice positioning for brain  
18 MR imaging Neuroimage 2005;27:222-230.
- 19 132. Benner T, Wisco JJ, van der Kouwe AJ, et al. Comparison of manual and automatic  
20 section positioning of brain MR images Radiology 2006;239:246-254.
- 21 133. Ostergaard L, Sorensen AG, Kwong KK, Weisskoff RM, Gyldensted C, Rosen BR. High  
22 resolution measurement of cerebral blood flow using intravascular tracer bolus passages. part  
23 II: Experimental comparison and preliminary results Magn Reson Med 1996;36:726-736.

- 1 134. Boxerman JL, Schmainda KM, Weisskoff RM. Relative cerebral blood volume maps  
2 corrected for contrast agent extravasation significantly correlate with glioma tumor grade,  
3 whereas uncorrected maps do not. *AJNR Am J Neuroradiol* 2006;27:859-867.
- 4 135. Dennie J, Mandeville JB, Boxerman JL, Packard SD, Rosen BR, Weisskoff RM. NMR  
5 imaging of changes in vascular morphology due to tumor angiogenesis *Magn Reson Med*  
6 1998;40:793-799.
- 7 136. Pathak AP, Schmainda KM, Ward BD, Linderman JR, Rebro KJ, Greene AS. MR-derived  
8 cerebral blood volume maps: Issues regarding histological validation and assessment of tumor  
9 angiogenesis. *Magn Reson Med* 2001;46:735-747.
- 10 137. Schmainda KM, Rand SD, Joseph AM, et al. Characterization of a first-pass gradient-  
11 echo spin-echo method to predict brain tumor grade and angiogenesis *Am J Neuroradiol*  
12 2004;25:1524-1532.
- 13 138. Tofts PS, Brix G, Buckley DL, et al. Estimating kinetic parameters from dynamic  
14 contrast-enhanced T(1)-weighted MRI of a diffusible tracer: Standardized quantities and  
15 symbols *J Magn Reson Imaging* 1999;10:223-232.
- 16  
17
